# Supplementary material for: False-negative RT-PCR for COVID-19 and a diagnostic risk score: a retrospective cohort study among patients admitted to hospital
Source: PubMed Central journal article supplement — BMJ Open. 2021 Feb 9;11(2):e047110. doi: 10.1136/bmjopen-2020-047110 (PMC7874904; doi:10.1136/bmjopen-2020-047110), 2021-02-09
Supplement: bmjopen-2020-047110.draft_revisions.pdf [file bmjopen-2020-047110.draft_revisions.pdf]

# BMJ Open

BMJ Open is committed to open peer review. As part of this commitment we make the peer review history of every article we publish publicly available.

When an article is published we post the peer reviewers' comments and the authors' responses online. We also post the versions of the paper that were used during peer review. These are the versions that the peer review comments apply to.

The versions of the paper that follow are the versions that were submitted during the peer review process. They are not the versions of record or the final published versions. They should not be cited or distributed as the published version of this manuscript.

BMJ Open is an open access journal and the full, final, typeset and author-corrected version of record of the manuscript is available on our site with no access controls, subscription charges or pay-per-view fees (<http://bmjopen.bmj.com>).

If you have any questions on BMJ Open's open peer review process please email [info.bmjopen@bmj.com](mailto:info.bmjopen@bmj.com)

# BMJ Open

## False-negative RT-PCR for COVID-19 and a diagnostic risk score: a retrospective cohort study among patients admitted to hospital

|                               |                                                                                                                                                                                                                                                                                                                                                                                                                                                                                                                                                                                                                                                                                                                                                                                                                                                                                                                                                                                                                                                                                                                                                                                                                                                                                                                                                                                                                                                                                                                           |
|-------------------------------|---------------------------------------------------------------------------------------------------------------------------------------------------------------------------------------------------------------------------------------------------------------------------------------------------------------------------------------------------------------------------------------------------------------------------------------------------------------------------------------------------------------------------------------------------------------------------------------------------------------------------------------------------------------------------------------------------------------------------------------------------------------------------------------------------------------------------------------------------------------------------------------------------------------------------------------------------------------------------------------------------------------------------------------------------------------------------------------------------------------------------------------------------------------------------------------------------------------------------------------------------------------------------------------------------------------------------------------------------------------------------------------------------------------------------------------------------------------------------------------------------------------------------|
| Journal:                      | <i>BMJ Open</i>                                                                                                                                                                                                                                                                                                                                                                                                                                                                                                                                                                                                                                                                                                                                                                                                                                                                                                                                                                                                                                                                                                                                                                                                                                                                                                                                                                                                                                                                                                           |
| Manuscript ID                 | bmjopen-2020-047110                                                                                                                                                                                                                                                                                                                                                                                                                                                                                                                                                                                                                                                                                                                                                                                                                                                                                                                                                                                                                                                                                                                                                                                                                                                                                                                                                                                                                                                                                                       |
| Article Type:                 | Original research                                                                                                                                                                                                                                                                                                                                                                                                                                                                                                                                                                                                                                                                                                                                                                                                                                                                                                                                                                                                                                                                                                                                                                                                                                                                                                                                                                                                                                                                                                         |
| Date Submitted by the Author: | 19-Nov-2020                                                                                                                                                                                                                                                                                                                                                                                                                                                                                                                                                                                                                                                                                                                                                                                                                                                                                                                                                                                                                                                                                                                                                                                                                                                                                                                                                                                                                                                                                                               |
| Complete List of Authors:     | Gupta-Wright, Ankur; University College London, Institute for Global Health; London School of Hygiene and Tropical Medicine Faculty of Infectious and Tropical Diseases, Clinical Research Department<br>Macleod, Colin; London North West University Healthcare NHS Trust; London School of Hygiene and Tropical Medicine Faculty of Infectious and Tropical Diseases, Clinical Research Department<br>Barrett, Jessica; London North West University Healthcare NHS Trust<br>Filson, Sarah; London North West University Healthcare NHS Trust<br>Corrah, Tumena; London North West University Healthcare NHS Trust<br>Parris, Victoria; London North West University Healthcare NHS Trust<br>Sandhu, Gurjinder; London North West University Healthcare NHS Trust<br>Harris, Miriam; London North West Healthcare NHS Trust, Microbiology<br>Tennant, Rachel; London North West University Healthcare NHS Trust<br>Vaid, Nidhi; London North West University Healthcare NHS Trust<br>Takata, Junko; London North West University Healthcare NHS Trust<br>Duraisingham, Sai; London North West University Healthcare NHS Trust<br>Gandy, Nemi; London North West University Healthcare NHS Trust<br>Chana, Harmeet; London North West University Healthcare NHS Trust<br>Whittington, Ashley; London North West University Healthcare NHS Trust<br>McGregor, Alastair; London North West University Healthcare NHS Trust<br>Papineni, Padmasayee; London North West University Healthcare NHS Trust, Infectious Diseases |
| Keywords:                     | COVID-19, Molecular diagnostics < INFECTIOUS DISEASES, Epidemiology < INFECTIOUS DISEASES                                                                                                                                                                                                                                                                                                                                                                                                                                                                                                                                                                                                                                                                                                                                                                                                                                                                                                                                                                                                                                                                                                                                                                                                                                                                                                                                                                                                                                 |
|                               |                                                                                                                                                                                                                                                                                                                                                                                                                                                                                                                                                                                                                                                                                                                                                                                                                                                                                                                                                                                                                                                                                                                                                                                                                                                                                                                                                                                                                                                                                                                           |

SCHOLARONE™  
Manuscripts

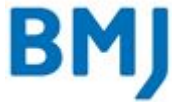

I, the Submitting Author has the right to grant and does grant on behalf of all authors of the Work (as defined in the below author licence), an exclusive licence and/or a non-exclusive licence for contributions from authors who are: i) UK Crown employees; ii) where BMJ has agreed a CC-BY licence shall apply, and/or iii) in accordance with the terms applicable for US Federal Government officers or employees acting as part of their official duties; on a worldwide, perpetual, irrevocable, royalty-free basis to BMJ Publishing Group Ltd ("BMJ") its licensees and where the relevant Journal is co-owned by BMJ to the co-owners of the Journal, to publish the Work in this journal and any other BMJ products and to exploit all rights, as set out in our [licence](#).

The Submitting Author accepts and understands that any supply made under these terms is made by BMJ to the Submitting Author unless you are acting as an employee on behalf of your employer or a postgraduate student of an affiliated institution which is paying any applicable article publishing charge ("APC") for Open Access articles. Where the Submitting Author wishes to make the Work available on an Open Access basis (and intends to pay the relevant APC), the terms of reuse of such Open Access shall be governed by a Creative Commons licence – details of these licences and which [Creative Commons](#) licence will apply to this Work are set out in our licence referred to above.

Other than as permitted in any relevant BMJ Author's Self Archiving Policies, I confirm this Work has not been accepted for publication elsewhere, is not being considered for publication elsewhere and does not duplicate material already published. I confirm all authors consent to publication of this Work and authorise the granting of this licence.

1  
2  
3 **BMJ Open: Original Research Article**  
4  
5  
6  
7

8 **Title:**  
9

10 False-negative RT-PCR for COVID-19 and a diagnostic risk score: a retrospective cohort study  
11  
12 among patients admitted to hospital  
13  
14  
15  
16

17  
18 **Authors:**  
19

20 Ankur Gupta-Wright (1,2,3)\*, Colin Kenneth Macleod (2,3)\*, Jessica Barrett (3), Sarah Ann  
21  
22 Filson (3), Tumena Corrah (3), Victoria Parris (3), Gurjinder Sandhu (3), Miriam Harris (3),  
23  
24 Rachel Tennant (3), Nidhi Vaid (3), Junko Takata (3), Sai Duraisingham (3), Nemi Gandy (3),  
25  
26 Harmeet Chana (3), Ashley Whittington (3), Alastair McGregor (3), Padmasayee Papineni (3)  
27  
28

29 \*Contributed equally  
30  
31  
32  
33  
34

35 **Author affiliations**  
36

- 37 1. Institute for Global Health, University College London, London UK  
38  
39 2. Clinical Research Department, London School of Hygiene & Tropical Medicine, London UK  
40  
41 3. London North West University Healthcare NHS Trust, London, United Kingdom  
42  
43  
44  
45

46 **Corresponding author:**  
47

48 Ankur Gupta-Wright  
49

50  
51 Institute for Global Health

52  
53 University College London

54  
55 Mortimer Market, off Caper Street

56  
57  
58 London WC1E 6JB  
59  
60

1  
2  
3  
4  
5  
6  
7  
8  
9  
10  
11  
12  
13  
14  
15  
16  
17  
18  
19  
20  
21  
22  
23  
24  
25  
26  
27  
28  
29  
30  
31  
32  
33  
34  
35  
36  
37  
38  
39  
40  
41  
42  
43  
44  
45  
46  
47  
48  
49  
50  
51  
52  
53  
54  
55  
56  
57  
58  
59  
60

[ankurgw@outlook.com](mailto:ankurgw@outlook.com)

+44 (0) 7764607560

Word Count: 3,759 (abstract 266)

Keywords: COVID-19, diagnosis, risk score, hospital

For peer review only

## **ABSTRACT**

Objective: To describe the characteristics and outcomes of patients with a clinical diagnosis of COVID-19 and false negative SARS-CoV-2 RT-PCR, and develop and internally validate a diagnostic risk score to predict risk of COVID-19 (including RT-PCR negative COVID-19) amongst medical admissions

Design: Retrospective cohort study

Setting: Two hospitals within an acute NHS trust in London, UK

Participants: All patients admitted to medical wards between 2<sup>nd</sup> March and 3<sup>rd</sup> May 2020.

Outcomes: Main outcomes were diagnosis of COVID-19, SARS-CoV-2 RT-PCR results, sensitivity of SARS-CoV-2 RT-PCR and mortality during hospital admission. For the diagnostic risk score, we report discrimination, calibration and diagnostic accuracy of the model and simplified risk score, and internal validation.

Results: 4008 patients were admitted between 2<sup>nd</sup> March and 3<sup>rd</sup> May 2020. 1792 patients (44.8%) were diagnosed with COVID-19, of whom 1391 were SARS-CoV-2 RT-PCR positive, and 283 had only negative RT-PCRs. Compared to a clinical reference standard, sensitivity of RT-PCR in hospital patients was 83.1% (95% CI 81.2-84.8%). Broadly, patients with false-negative RT-PCR COVID-19 and those confirmed by positive PCR had similar demographic and clinical characteristics, but lower risk of ITU admission and lower in-hospital mortality (adjusted odds ratio 0.41, 95% CI 0.27-0.61). A simple diagnostic risk score comprising of age,

1  
2  
3 sex, ethnicity, cough, fever or shortness of breath, National Early Warning Score (NEWS2), C-  
4  
5  
6 Reactive Protein, and chest radiograph appearance had moderate discrimination (area under  
7  
8 the receiver-operator-curve 0.83, 95% CI 0.82-0.85), good calibration and was internally  
9  
10 validated.  
11  
12  
13  
14

15 Conclusion: RT-PCR negative COVID-19 is common and is associated with lower mortality  
16  
17 despite similar presentation. Diagnostic risk scores could potentially help triage patients  
18  
19 requiring admission, but need external validation.  
20  
21  
22  
23  
24  
25  
26  
27  
28  
29  
30  
31  
32  
33  
34  
35  
36  
37  
38  
39  
40  
41  
42  
43  
44  
45  
46  
47  
48  
49  
50  
51  
52  
53  
54  
55  
56  
57  
58  
59  
60

### STRENGTHS AND LIMITATIONS OF THIS STUDY

- Large cohort of consecutive acute medical admissions in two hospitals covering a diverse population in London, UK, during first COVID-19 'peak'
- Assessment of 'real world' performance of SARS CoV-2 RT-PCR from nasopharyngeal swabs for diagnosis of COVID-19
- Inherent limitations of retrospective cohort study design, including some missing data
- Not all patients had SARS-CoV-2 RT-PCR testing



## INTRODUCTION

The coronavirus disease 2019 (COVID-19) global pandemic, caused by infection with the severe acute respiratory syndrome coronavirus 2 (SARS-CoV-2), has led to unprecedented numbers of unwell and infectious patients requiring admission to hospital. The symptoms of COVID-19 can be non-specific, so diagnostic confirmation in hospital is often sought by detection of SARS-CoV-2 ribonucleic acid (RNA) sequences by reverse transcription-polymerase chain reaction (RT-PCR) from a clinical specimen.

Since the beginning of the pandemic, the standard sample for PCR testing has been a nasopharyngeal swab (NPS) or aspirate, but there are concerns that a significant proportion of cases test negative on initial RT-PCR of an NPS sample, with many patients having repeated sampling to confirm the diagnosis.<sup>1</sup> A systematic review of real-world diagnostic sensitivity of SARS-CoV-2 RT-PCR reports that up to 33% of patients with COVID-19 may have an initial false negative NPS result despite a compatible clinical illness, consistent thoracic imaging and/or subsequent positive antibodies to COVID-19.<sup>2-5</sup> False negative RT-PCR may result from inadequate nasopharyngeal sampling technique, delayed time to analysis, ineffective sample storage, variable gene targets in RT-PCR assays leading to imperfect analytic sensitivity, or if a patient is tested at a point when viral throat carriage is absent or below the detectable threshold (either too early or too late).<sup>6,7</sup> This high false negative rate complicates both hospital infection control and clinical decision making. Being able to identify patients with a high probability of COVID-19 despite a negative RT-PCR is crucial for effective clinical care.

The clinical characteristics and outcomes of hospitalised patients with COVID-19 have been well described globally, but these studies are limited to patients with RT-PCR confirmed

1  
2  
3  
4 25 COVID-19.<sup>8-10</sup> The pattern of disease and outcomes of patients with false negative COVID-19  
5  
6 26 tests has not been well reported to date, nor has the diagnostic accuracy of RT-PCR assays in  
7  
8 27 secondary care settings in the United Kingdom (UK). Several studies have derived and  
9  
10 28 validated risk scores to assess severity and prognosis amongst patients with COVID-19.  
11  
12  
13 29 However few risk scores focus on identifying patients with COVID-19 amongst those needing  
14  
15 30 hospital admission and those that do are from outside the UK, do not consider all hospital  
16  
17 31 admissions, rely on high-resolution computerised tomography (CT) scanning of the lungs, and  
18  
19 32 exclude patients without RT-PCR-confirmed disease.<sup>11</sup>  
20  
21  
22  
23 33

24  
25 34 We therefore aim to describe the characteristics and outcomes of patients with a clinical  
26  
27 35 diagnosis of COVID-19 but with negative RT-PCR from NPS, and the real-world sensitivity of  
28  
29 36 RT-PCR for COVID-19. Secondly, we describe predictors of COVID-19 amongst general  
30  
31 37 medical admissions, including assessing whether a simple diagnostic risk score could be  
32  
33 38 derived, internally validated, and used to predict which patients admitted to medical wards will  
34  
35 39 have COVID-19.  
36  
37  
38

## 39 40 **METHODS**

### 41 42 **Study design**

43  
44 42 This is a retrospective observational cohort study of consecutive admissions in London North  
45  
46 43 West University Healthcare NHS Trust, comprising two hospitals, Northwick Park and Ealing.  
47  
48 44 Patients were included in this study if they were admitted via the acute medical team between  
49  
50 45 2<sup>nd</sup> March and 3<sup>rd</sup> May 2020 inclusive.  
51  
52  
53  
54 46

### 56 47 **Data collection**

1  
2  
3 48 Cases were identified retrospectively through electronic medical admission lists. De-identified  
4  
5  
6 49 data on patient demographics, co-morbidities, clinical characteristics, vital signs, routine  
7  
8 50 biochemical, haematological and microbiological tests, diagnosis and clinical outcomes were  
9  
10 51 extracted from routinely collected clinical data using electronic patient record systems, and  
11  
12  
13 52 other NHS Trust health information systems. Physiological observations were those first  
14  
15 53 recorded on admission to the emergency department. All biochemical and haematological data  
16  
17 54 were from the first samples taken within 48 hours of admission. Thoracic imaging (chest  
18  
19 55 radiographs and CT) were reported by consultant radiologists and coded based upon COVID-  
20  
21 56 19 guidelines from the British Society of Thoracic Imaging (BSTI).<sup>12</sup>  
22  
23  
24

25 57  
26  
27 58 RT-PCR of a clinical specimen from NPS was the only SARS-CoV-2 testing available during  
28  
29 59 the study period. The decision to test was based on a clinical suspicion of COVID-19. Testing  
30  
31 60 was performed at the point of admission or as soon as possible afterwards. Due to high  
32  
33 61 demand and limited capacity, some patients with high clinical suspicion did not undergo SARS-  
34  
35 62 CoV-2 testing. Routine testing for all admissions was introduced after the study period. Most  
36  
37 63 SARS-CoV-2 testing was done using Panther Fusion™ (Hologic; ORF1ab Region 1 / 2 target)  
38  
39 64 or Abbott RealTime™ (RNA-dependent RNA polymerase, Nucleocapsid target) assays on  
40  
41 65 NPS.  
42  
43  
44  
45  
46  
47  
48

49 67 Approval for this study was provided by London North West University Healthcare NHS Trust  
50  
51 68 research and governance department, and the NHS Health Regulatory Authority (IRAS ID  
52  
53 69 285815). Written informed consent from participants was not obtained in compliance with  
54  
55 70 Secretary of State for Health and Social Care 'Notice' under Regulation 3(4) of the Health  
56  
57 71 Service Control of Patient Information Regulations 20021 (COPI) requiring health providers to  
58  
59  
60

1  
2  
3  
4 72 process confidential patient and Control of Patient Information Regulations due to the COVID-  
5  
6 73 19 pandemic.  
7

8 74  
9

## 10 75 **Definitions**

11  
12  
13 76 Patients were assigned as having RT-PCR confirmed COVID-19 if they had a positive SARS-  
14  
15 77 CoV-2 RT-PCR within 7 days before or after the date of admission, and had a discharge  
16  
17  
18 78 diagnosis of COVID-19 recorded by the clinical team. False-negative RT-PCR COVID-19 was  
19  
20 79 defined as patients with a discharge diagnosis of COVID-19 made by the clinical team and one  
21  
22 80 or more negative SARS-CoV-2 RT-PCR within 48 hours of admission in the absence of any  
23  
24  
25 81 positive SARS-CoV-2 RT-PCR results. Patients with evidence of alternative diagnoses (i.e. not  
26  
27 82 COVID-19) made by the clinical team and no positive SARS-CoV-2 RT-PCR results were  
28  
29  
30 83 defined as not having COVID-19. Medical records for patients with positive SARS-CoV-2 tests  
31  
32 84 greater than 7 days after admission but before discharge, and a diagnosis of COVID-19 were  
33  
34  
35 85 reviewed as to whether the admission was likely to represent a missing or delayed SARS-CoV-  
36  
37 86 2 RT-PCR result (i.e. patients with community-acquired COVID-19) or nosocomial COVID-19  
38  
39 87 transmission. Mortality was assessed at discharge from hospital.  
40

41 88  
42  
43

## 44 89 **Statistical methods**

45  
46 90 Basic descriptive statistics were performed, with continuous data presented as median  
47  
48  
49 91 (interquartile range) and categorical data as frequency (%). Comparisons were made using chi-  
50  
51 92 squared tests for proportions, t-tests for means and Wilcoxon rank sum for medians. Logistic  
52  
53  
54 93 regression was used to assess associations between variables and diagnosis of COVID-19. In  
55  
56 94 exploratory analyses to assess association between RT-PCR negative COVID-19 and  
57  
58  
59  
60

1  
2  
3 95 mortality, a multivariable logistic regression model was used adjusting for other variable  
4  
5  
6 96 associated with poor outcomes in COVID-19.<sup>13</sup>  
7  
8 97

### 98 **Sensitivity and false-negative RT-PCR**

99 The real-world sensitivity of SARS-CoV-2 RT-PCR from NPS against a reference standard of a  
100 clinical diagnosis of COVID-19 was estimated as the proportion of patients positive from any  
101 RT-PCR, excluding those without any valid RT-PCR results. Sensitivity was also calculated by  
102 restricting analyses to patients with two or more RT-PCR results from NPS taken in a 24- and  
103 48-hour period. The reference standard was patients with at least one positive RT-PCR in the  
104 time period. Incremental yield of a second RT-PCR following an initial negative result in  
105 patients was also calculated. Specificity of SARS-CoV-2 RT-PCR was assumed to be 100%.

### 107 **Diagnostic Risk Score**

108 In development of a score to predict COVID-19 among medical admissions, candidate predictor  
109 variables were selected based on *a priori* knowledge, published literature, clinical reasoning  
110 and the need for variables to be objective, reproducible, available in the emergency department  
111 soon after presentation. We considered demographic characteristics (age, sex, ethnicity),  
112 clinical symptoms associated with COVID-19 (cough, fever or shortness of breath), vital signs  
113 (including National Early Warning [NEWS] Score 2), and laboratory bloods (including C-reactive  
114 protein (CRP) and arterial/venous blood gas) at the time of presentation to hospital.

115  
116 Continuous variables were assessed for non-linearity using fractional polynomials, and  
117 categorised based on established cut-off values and/or fractional polynomials. Complete case  
118 analysis was chosen for derivation and internal validation of the score, given most key variables

1  
2  
3  
4 119 had fewer than 10% missing data. To derive a prediction model, we undertook univariable  
5  
6 120 logistic regression analysis assessing associations between candidate variables and COVID-19  
7  
8 121 diagnosis (including all COVID-19 irrespective of RT-PCT status). We then used a backward  
9  
10  
11 122 elimination approach to create a multivariable predictive model, with stepwise elimination of  
12  
13 123 variables, using likelihood ratio tests and Akaike information criterion to compare models.  
14  
15 124 Interaction in the model were also assessed using likelihood ratio testing.

16  
17  
18 125  
19  
20 126 Points were assigned to each variable by identifying clusters of regression coefficients from the  
21  
22 127 final model, then taking the median of those clustered coefficients and scaling so the lowest  
23  
24  
25 128 point score is at least one, and then rounding to the nearest integer.<sup>14</sup> A COVID-19 diagnostic  
26  
27 129 risk score was then derived by combining the points based on patient characteristics.

28  
29  
30 130 Performance of both the full predictive model and risk score was assessed using the area  
31  
32 131 under the receiver-operator curve (AUROC, also known as concordance-statistic) for  
33  
34 132 discrimination, and plots of predicted probability of COVID-19 against observed risk of COVID-  
35  
36  
37 133 19 for calibration (calibration plots). Decision curve analysis was also conducted to help weigh  
38  
39 134 benefits of using the model, compared to assuming all or no patients were diagnosed with  
40  
41  
42 135 COVID-19, and comparison with other single variables with strong associations with COVID-19.

43  
44 136  
45  
46 137 Internal model validation was done using the bootstrap procedure, with final model applied to  
47  
48  
49 138 each bootstrap sample (n=200), and an optimism corrected AUROC calculated.<sup>15</sup> A prediction  
50  
51 139 model was also generated using bootstrap samples and tested on the original dataset. Cut-off  
52  
53  
54 140 thresholds were defined to identify patients at high- and low-risk of COVID-19 after plotting risk  
55  
56 141 score against observed COVID risk such that the high-risk group accounted for as many  
57  
58 142 COVID-19 cases as the low-risk as few as possible. Sensitivity, specificity, positive predictive  
59  
60

1  
2  
3  
4 143 value (PPV) and negative predictive value (NPV) were calculated for each threshold, and NPV  
5  
6 144 and PPV calculated for varying prevalence of COVID-19 amongst medical admissions.  
7  
8 145 Sensitivity analysis used multivariate multiple imputation with chained equations for missing  
9  
10 146 data, assuming they were missing at random. Imputation was done for missing candidate  
11  
12  
13 147 predictor variables using 20 imputations, and model generation and performance repeated. All  
14  
15 148 analyses were done using Stata version 16 (StataCorp 2019). Predictive modelling elements  
16  
17  
18 149 are presented in accordance with TRIPOD guidance.<sup>16</sup>  
19  
20 150

## 22 151 **RESULTS**

### 24 152 **Patient characteristics**

25 153 Between 2<sup>nd</sup> March and 3<sup>rd</sup> May 2020, 4008 patients were admitted (2536 at Northwick Park  
26  
27 154 Hospital, and 1472 at Ealing Hospital), with 1792 (44.7%) diagnosed with COVID-19 (figure 1).  
28  
29  
30 155 There were a median of 65 (IQR 57-76) admissions daily, including median daily admission of  
31  
32 156 47 (IQR 28-56) patients diagnosed with COVID-19 (supplementary figure 1). 1391 (77.6%)  
33  
34  
35 157 COVID-19 diagnoses had at least one positive SARS-CoV-2 RT-PCR. 283 (15.8%) had at  
36  
37 158 least one negative and no positive RT-PCR, and 119 (6.6%) did not have a RT-PCR result.  
38  
39  
40 159  
41  
42 160 There were several differences between patients with and without a COVID-19 diagnosis at  
43  
44 161 discharge (including those with false negative RT-PCR results, table 1 and supplementary table  
45  
46  
47 162 1). Most notably patients with COVID-19 were more likely to be male, be more unwell at  
48  
49 163 admission (NEWS score 6 vs 2 for patients without COVID-19) and more likely to need  
50  
51 164 supplementary oxygen. On chest radiograph, patients with COVID-19 were more likely to have  
52  
53  
54 165 lung infiltrates (79% vs 48%) and less likely to have clear lung fields (7% vs 33%).  
55  
56  
57  
58  
59 166  
60

## 167 Outcomes

168 Overall 248 (6.2%) of medical admissions were admitted to intensive care unit (ICU) for level 2  
169 or 3 support. Patients with COVID-19 diagnosis were more likely to be admitted to ICU (12.7%  
170 compared to 1.0%,  $p < 0.0001$ ). Median time to intensive care admission was 1 day (IQR 0-3)  
171 from admission. Inpatient mortality was 15.6% overall with substantially higher mortality in  
172 patients with COVID-19 diagnosis (26.9% compared to 6.4%). 0.4% [n=16] remained admitted  
173 at the time of data extraction or were missing mortality status. Inpatient death occurred a  
174 median of 5 (IQR 2-10) days after admission for patients with COVID-19, and hospital stay was  
175 longer than for those without COVID-19 (median 5 [IQR 3-11] days compared to median 3 [IQR  
176 1-7] days,  $P < 0.0001$ ).

## 178 Sensitivity of SARS-CoV-2 RT-PCR

179 Based on COVID-19 patients with a at least one valid SARS-CoV-2 RT-PCR result (n=1674),  
180 16.9% (n=283) diagnosed with COVID-19 had at least one false-negative RT-PCR. 217  
181 patients had a single negative result, with 66 having two or more negative results. Median time  
182 from admission to negative swab was 0 (IQR 0-1) days. Based on a clinical COVID-19  
183 reference standard, the sensitivity of PCR was 83.1% (95% CI 81.2-84.8%). The diagnostic  
184 yield (i.e. including those without SARS-CoV-2 PCR results) of SAR-CoV-2 PCR testing of  
185 nasopharyngeal swabs was 77.6% (95% CI 75.6-79.5%). If restricted to patients with chest  
186 radiology suggestive of COVID-19, 198/968 patients with COVID-19 were RT-PCR negative,  
187 giving a sensitivity of 79.6%.

188  
189 A total of 185 patients with COVID-19 had two RT-PCR tests within 24 hours, at least one of  
190 which was positive. 35/185 had a false-negative RT-PCR, giving a sensitivity of 81.1% (95% CI



1  
2  
3  
4 191 74.7-86.5%). 62/254 patients with COVID-19 and two or more RT-PCR tests within 48 hours,  
5  
6 192 giving a sensitivity of 75.6% (95% CI 70.0-80.5%). 557 patients with two RT-PCR tests within  
7  
8 193 24 hours had an initial negative test, of whom 17 had a second test that was positive, giving an  
9  
10 194 incremental yield of 3.1% (95% CI 1.9-4.8%). 36/669 patients with an initial negative RT-PCR  
11  
12  
13 195 had a second test that was positive within 48 hours, giving an incremental yield of 5.4% (95%  
14  
15 196 CI 3.9-7.4%).

### 17 18 197 19 20 198 **False-negative COVID-19 RT-PCR**

21  
22 199 Of patients with RT-PCR negative COVID-19, 70.0% (198/283) had chest radiography or chest  
23  
24  
25 200 CT suggestive of COVID-19 based on BSTI coding, 80.2% (227/283) had lung infiltrates on  
26  
27 201 chest imaging, and only 6.7% (19/283) had normal lung fields on chest radiography. 88.0%  
28  
29  
30 202 reported cough, fever or shortness of breath at admission. Broadly, patients with false-negative  
31  
32 203 RT-PCR COVID-19 and those confirmed by positive PCR had similar demographic and clinical  
33  
34 204 characteristics. Distribution of NEWS score and CRP were similar to RT-PCR-confirmed  
35  
36  
37 205 COVID-19 patients, and differed from those without COVID-19 diagnosis (supplementary figure  
38  
39 206 2). Notable differences include false-negative RT-PCR COVID-19 patients being more likely to  
40  
41  
42 207 report shortness of breath, slightly longer duration of symptoms (median of 7 [IQR 3-12] days  
43  
44 208 compared to 6 [IQR 3-10] days for PCR-positive patients) (table 1). False negative RT-PCR  
45  
46 209 patients also had higher median lymphocyte and platelet counts.

47  
48  
49 210  
50  
51 211 Importantly, outcomes were worse for patients with RT-PCR confirmed COVID-19 compared to  
52  
53 212 those who were had a false-negative RT-PCR, with a higher proportion admitted to ITU (13.8  
54  
55 213 [95% CI 12.1-15.7 vs 7.8 [95% CI 5.2-11.5]%,  $p=0.006$ ), and more patients dying during  
56  
57 214 admission (29.4 [95% CI 27.1-31.9] vs 21.0 [95% CI 12.7-21.4]%,  $p<0.0001$ ). When limited  
58  
59  
60

1  
2  
3  
4 215 to patients with chest radiology suggestive of COVID-19, patients with false-negative RT-PCR  
5  
6 216 disease still had better outcomes than PCR-confirmed COVID-19 (ITU admission 8.4%,  
7  
8 217 mortality 16.3%, n=227). In exploratory analyses adjusted for age, sex, co-morbidities,  
9  
10  
11 218 admission oxygen saturation and admission urea, OR for mortality was 0.41 (95% CI 0.27-0.61)  
12  
13 219 for RT-PCR negative compared to RT-PCR positive COVID-19 (see table supplementary table  
14  
15 220 2).

### 20 222 **Predictors of COVID-19 and diagnostic model**

21  
22  
23 223 Several demographic and clinical variables were strongly associated with a diagnosis of  
24  
25 224 COVID-19, both in univariable and multivariable analysis (table 2). Abnormal chest radiography  
26  
27 225 with infiltrates (OR 7.8, 95% CI 6.3-9.6), CRP over 50 (OR 6.0, 95% CI 5.2-6.9) and NEWS 2  
28  
29  
30 226 score 5 or more (OR 5.2, 95% CI 5.0-6.6) had the strongest associations with COVID-19  
31  
32 227 diagnosis.

33  
34  
35 228  
36  
37 229 The final multivariable diagnostic model included age (modelled as a binary variable being  
38  
39 230 between 50 and 70 years old), sex, ethnicity, reporting anyone of cough, fever or shortness of  
40  
41  
42 231 breath, NEWS 2, CRP, and chest radiograph appearance (n=2,940 table 3). Discrimination of  
43  
44 232 the full model was moderate (AUC of ROC 0.83, 95% CI 0.82-0.85), with good calibration (see  
45  
46 233 figure 2). A simplified risk score was constructed based on  $\beta$ -coefficients (table 3), with similar  
47  
48  
49 234 calibration and discrimination to the full model (AUC 0.83, 95% CI 8.1 – 8.4). Internal validation  
50  
51 235 using bootstrap samples (n=200) generated an optimism corrected AUC 0.82 (95% CI 0.80-  
52  
53  
54 236 0.84, AUC for internal validated model 0.83 [95% CI 0.81 – 0.85]). Decision curve analysis  
55  
56 237 showed the diagnostic risk score model had better clinical utility across a range of thresholds  
57  
58  
59 238 than treating all or no patients as having COVID-19, using a CRP of >50, or a NEWS score  $\geq 5$   
60

1  
2  
3  
4 239 (see figure 2). The model and risk score performed similarly in sensitivity analyses using  
5  
6 240 multiple imputation instead of complete case analysis, and assessing the risk score using the  
7  
8 241 whole patient population (see supplementary table 3).  
9  
10  
11 242  
12  
13 243 The number and proportion of patients with or without COVID-19 diagnosis based on the risk  
14  
15 244 score is shown in figure 3. 446 (15%) of patients had a score of <4, of whom 10.9% (49/446)  
16  
17  
18 245 were diagnosed with COVID-19. Using this threshold to identify patients *without* COVID-19 had  
19  
20 246 a 26.6% sensitivity, but 96.6% specificity, with an 89.0% positive predictive value (PPV,  
21  
22  
23 247 supplementary table 4). 594 (20.2%) patients were above the high-risk threshold, set at a  
24  
25 248 diagnostic risk score >9. At high COVID-19 prevalence (50%), this threshold had a good PPV  
26  
27 249 (>90%), and at a low prevalence (<5%), had a high NPV. However, most patients fell in  
28  
29  
30 250 between both thresholds. Potential uses for such a clinical score are highlighted in  
31  
32 251 supplementary table 5.

33  
34 25235  
36 25337  
38 25439  
40 25541  
42 25643  
44 25745  
46 25847  
48 25949  
50 26051  
52 26153  
54  
55  
56  
57  
58  
59  
60

## **DISCUSSION**

The key findings of this study are that SARS-CoV-2 RT-PCR negative COVID-19 is common amongst patients admitted to hospital, with real-life sensitivity of RT-PCR testing from NPS being 83% compared to a clinical reference standard of clinical diagnosis of COVID-19. Patients with RT-PCR negative COVID-19 had similar clinical characteristics to RT-PCR positive patients in this and other cohorts,<sup>17</sup> although significantly better outcomes (lower risk of mortality and ITU admission).<sup>13,17</sup> The proportion and number of COVID-19 admissions was increased during a three-week period from the 22<sup>nd</sup> March to 11<sup>th</sup> April 2020, and patients with

1  
2  
3  
4 262 COVID-19 were substantially more unwell than patients without COVID-19, with implications for  
5  
6 263 service delivery. Mortality in patients admitted without COVID-19 was also high at 6.4%.

7  
8 264  
9  
10 265 The current gold standard diagnostic test for COVID-19, SARS-CoV-2 PCR from  
11  
12  
13 266 nasopharyngeal swabs, has several limitations which are challenging health systems and  
14  
15 267 healthcare facilities management. We demonstrate, despite high analytical sensitivity, the real-  
16  
17  
18 268 life sensitivity of PCR is inadequate (around 80% at best).<sup>18</sup> Repeat testing of patients with an  
19  
20 269 initial negative RT-PCR only increased yield by 3-5% within 48 hours. In addition to slow  
21  
22  
23 270 turnaround times, and resource and logistical challenges, there is an urgent need for alternative  
24  
25 271 rapid and accurate methods to triage and stratify patient's risk of COVID-19, to allow  
26  
27  
28 272 appropriate infection control measures and safe patient flow to cohort areas or isolation rooms,  
29  
30 273 without overwhelming hospital infrastructure. CT imaging of lungs can lack specificity for  
31  
32 274 COVID-19, and rapid RT-PCR platforms are expensive and have inadequate throughput for  
33  
34  
35 275 future peaks of COVID-19.<sup>19,20</sup> Few studies have assessed pragmatic tools to assess risk of  
36  
37 276 COVID-19 based on readily available clinical or laboratory variables.<sup>21,22</sup>

38  
39 277  
40  
41  
42 278 We found several clinical, radiological and laboratory blood factors that were associated with  
43  
44 279 COVID-19. Our diagnostic score had moderate performance for discriminating COVID-19 from  
45  
46  
47 280 other diagnoses (AUROC 0.83). A low risk threshold had a good specificity and PPV, therefore  
48  
49 281 could be used identify patients with a low COVID risk for transfer to a low-risk cohort area.

50  
51 282 Similarly, the high-risk score had a good PPV and specificity, therefore these patients could be  
52  
53  
54 283 managed as having COVID-19, and cared for in isolation rooms or cohorts if necessary. Those  
55  
56 284 patients in neither high- nor low-risk group may benefit from rapid COVID-19 RT-PCR or  
57  
58  
59 285 antigen testing, depending on capacity. However, this score would need external validation  
60

1  
2  
3  
4 286 before use. Although derived from a cohort including unselected acute medical admissions, the  
5  
6 287 higher prevalence of other respiratory viral pathogens may impact performance, especially  
7  
8 288 specificity.<sup>23</sup> Furthermore, this score does not account for the vulnerability of individual patients  
9  
10 289 for severe COVID-19 (eg based on age or comorbidities), which would also impact decisions on  
11  
12  
13 290 isolation and testing.<sup>22</sup>

14  
15 291  
16  
17  
18 292 This is the first study, to our knowledge, reporting lower ITU admissions and mortality in RT-  
19  
20 293 PCR negative patients with COVID-19, despite similar markers of disease severity at admission  
21  
22  
23 294 (NEWS, CRP, oxygen saturations and requirement for supplementary oxygen), and in  
24  
25 295 multivariable adjusted model. Interestingly, the median duration of symptoms was slightly  
26  
27 296 longer, and median lymphocyte count was slightly higher in PCR-negative patients, suggesting  
28  
29  
30 297 they presented slightly later in their disease course, and therefore may be at a phase of illness  
31  
32 298 with lower viral burden in the upper respiratory tract.<sup>24-26</sup> This may also be associated with their  
33  
34  
35 299 better prognosis. Other potential reasons for better outcomes in PCR-negative patients with  
36  
37 300 COVID-19 include misclassification bias, where other respiratory conditions may have been  
38  
39 301 classified as COVID-19. However, sensitivity analysis in patients with chest radiology  
40  
41  
42 302 suggestive of COVID-19 had similar findings, and a small number of misclassifications are  
43  
44 303 unlikely to lead to such substantial differences in mortality.

45  
46 304  
47  
48  
49 305 During the study period, the overall number of daily admissions did not increase substantially.  
50  
51 306 However, the proportion of admissions that were related to COVID-19 increased substantially in  
52  
53  
54 307 late March and early April, with a fall in non-COVID-19 admissions, as previously  
55  
56 308 documented.<sup>27</sup> This has implications for planning for future COVID peaks. Another important  
57  
58 309 finding was the high mortality in patients without COVID-19, an over two-fold increase from  
59  
60

1  
2  
3  
4  
5  
6  
7  
8  
9  
10  
11  
12  
13  
14  
15  
16  
17  
18  
19  
20  
21  
22  
23  
24  
25  
26  
27  
28  
29  
30  
31  
32  
33  
34  
35  
36  
37  
38  
39  
40  
41  
42  
43  
44  
45  
46  
47  
48  
49  
50  
51  
52  
53  
54  
55  
56  
57  
58  
59  
60

310 mortality in the previous year (2.4% compared to 6.4%).<sup>27</sup> Whilst we were unable to describe  
311 the causes of death amongst these patients, the increased mortality may result from late  
312 presentation to hospital due to national government-mandated 'lockdown' COVID-19 control  
313 measures and fear of nosocomial transmission risk. This has been previously documented in  
314 paediatric, cardiology, and oncology patients, but not amongst acute medical admissions.<sup>28,29</sup>

315  
316 This study has several strengths. The cohort is in a large acute hospital trust with two sites  
317 covering a diverse population, and all consecutive medical admissions were included. This is  
318 one of the first large cohorts to report data on unselected acute medical admissions, and one of  
319 the largest cohorts of RT-PCR negative patients with COVID-19. There are also several  
320 limitations. The retrospective nature of the study has inherent limitations, including missing  
321 data. Although we included consecutive admitted patients, not all patients had SARS-CoV-2  
322 testing, and two different RT-PCR assays were used. The decision to repeat tests on patients  
323 with negative RT-PCR results was made by the responsible clinical team. The absence of  
324 serology or other confirmatory testing introduces a risk of misclassification bias and RT-PCR  
325 inclusion in the reference standard, and the influence of variables including in the diagnostic  
326 risk score on clinical diagnosis of COVID-19 introduces incorporation bias. However there  
327 remains no perfect reference standard for COVID-19 diagnosis and these biases are unlikely to  
328 significantly impact our findings. Our diagnostic risk model needs external validation, only has  
329 moderate discrimination, and is at risk of overfitting. Systematic reviews have struggled to  
330 identify other diagnostic clinical scores with high discrimination, and effective patient  
331 management is likely to involve a combination of clinical features, radiology and rapid PCR-  
332 testing.<sup>11</sup>

1  
2  
3  
4  
5  
6  
7  
8  
9  
10  
11  
12  
13  
14  
15  
16  
17  
18  
19  
20  
21  
22  
23  
24  
25  
26  
27  
28  
29  
30  
31  
32  
33  
34  
35  
36  
37  
38  
39  
40  
41  
42  
43  
44  
45  
46  
47  
48  
49  
50  
51  
52  
53  
54  
55  
56  
57  
58  
59  
60

334 In conclusion, we demonstrate that RT-PCR negative COVID-19 is common amongst patients  
335 admitted to hospital, and is associated with a better outcome despite similar severity at  
336 presentation. We derived and internally validated a diagnostic risk score with potential utility to  
337 help triage patients admitted from the emergency department, although prospective trials of  
338 different approaches are warranted in future peaks of COVID-19.

### **Acknowledgments**

342 The authors would like to acknowledge all staff at London North West University Healthcare  
343 Trust who were involved in the care of patients during the study period, staff supporting the  
344 provision of clinical care, and all patients and their families.

### **Funding statement**

347 This research received no specific grant from any funding agency in the public, commercial or  
348 not-for-profit sector

### **Author contributions**

351 AGW, CKM, TC, VP, GS, RT, NV, SD, AW, AM and PP made substantial contribution to the  
352 conception of the work. AGW, CKM, AW, AM and PP made substantial contribution to the  
353 design of the work. AGW, CKM, JB, SF, GS, JT, NG, HC contributed to data acquisition. AGW  
354 and CKM analysed the data. AGW, CKM, AW, AM, PP contributed to data interpretation. AGW  
355 and CFM drafted the manuscript. All authors contributed to revising the manuscript critically for  
356 important intellectual content, approved the final manuscript and are accountable for all aspects  
357 of the work.

1  
2  
3  
4  
5  
6  
7  
8  
9  
10  
11  
12  
13  
14  
15  
16  
17  
18  
19  
20  
21  
22  
23  
24  
25  
26  
27  
28  
29  
30  
31  
32  
33  
34  
35  
36  
37  
38  
39  
40  
41  
42  
43  
44  
45  
46  
47  
48  
49  
50  
51  
52  
53  
54  
55  
56  
57  
58  
59  
60

359 **Patient and Public Involvement Statement**

360 Due to the retrospective nature of this study, undertaken during the COVID-19 pandemic,  
361 patients or the public were not involved in the design, or conduct, or reporting, or dissemination  
362 plans of our research.

364 **Competing interests statement**

365 The authors have no competing interests to declare



|                                                                   |                               | Not diagnosed<br>with COVID | All COVID<br>diagnoses  | p-value | COVID negative<br>PCR  | COVID diagnosis<br>PCR positive | p-<br>value |
|-------------------------------------------------------------------|-------------------------------|-----------------------------|-------------------------|---------|------------------------|---------------------------------|-------------|
|                                                                   |                               | n=2215                      | n=1793                  |         | n=283                  | n=1391                          |             |
| <b>Age at admission, median<br/>years (IQR)</b>                   |                               | 71 (51, 82)<br>(n=2215)     | 69 (56, 81)<br>(n=1793) | 0.44    | 70 (54, 79)<br>(n=283) | 70 (57, 81)<br>(n=1391)         | 0.27        |
| <b>Age 65 years or older</b>                                      |                               | 1266 (57.2%)                | 1005 (56.1%)            | 0.48    | 154 (54.4%)            | 800 (57.5%)                     | 0.34        |
| <b>Sex</b>                                                        | Female                        | 1021 (46.1%)                | 651 (36.3%)             | <0.001  | 112 (39.6%)            | 498 (35.8%)                     | 0.23        |
|                                                                   | Male                          | 1193 (53.9%)                | 1142 (63.7%)            |         | 171 (60.4%)            | 893 (64.2%)                     |             |
| <b>Ethnicity</b>                                                  | South Asian                   | 486 (21.9%)                 | 447 (24.9%)             | <0.001  | 57 (20.1%)             | 362 (26.0%)                     | 0.15        |
|                                                                   | Asian Other                   | 174 (7.9%)                  | 211 (11.8%)             |         | 30 (10.6%)             | 162 (11.6%)                     |             |
|                                                                   | Black African or<br>Caribbean | 212 (9.6%)                  | 224 (12.5%)             |         | 33 (11.7%)             | 181 (13.0%)                     |             |
|                                                                   | Mixed Ethnicity               | 6 (0.3%)                    | 10 (0.6%)               |         | 2 (0.7%)               | 8 (0.6%)                        |             |
|                                                                   | Unknown                       | 330 (14.9%)                 | 318 (17.7%)             |         | 53 (18.7%)             | 233 (16.8%)                     |             |
|                                                                   | White European                | 890 (40.2%)                 | 458 (25.5%)             |         | 81 (28.6%)             | 361 (26.0%)                     |             |
|                                                                   | Other                         | 117 (5.3%)                  | 125 (7.0%)              |         | 27 (9.5%)              | 84 (6.0%)                       |             |
| <b>Index of Multiple<br/>Deprivation Decile,<br/>median (IQR)</b> |                               | 5 (3, 7) (n=2105)           | 5 (3, 6)<br>(n=1743)    | 0.048   | 4 (3, 6) (n=277)       | 5 (3, 6) (n=1366)               | 0.043       |
| <b>Diabetes</b>                                                   |                               | 563 (25.7%)                 | 599 (33.6%)             | <0.001  | 81 (28.9%)             | 482 (34.8%)                     | 0.059       |
| <b>Hypertension</b>                                               |                               | 825 (37.7%)                 | 739 (41.5%)             | 0.015   | 110 (39.3%)            | 590 (42.6%)                     | 0.31        |
| <b>Ischaemic Heart Disease</b>                                    |                               | 413 (18.9%)                 | 309 (17.3%)             | 0.21    | 44 (15.7%)             | 247 (17.8%)                     | 0.40        |
| <b>Heart Failure</b>                                              |                               | 156 (7.1%)                  | 70 (3.9%)               | <0.001  | 14 (5.0%)              | 53 (3.8%)                       | 0.36        |

|                                              |           |                   |                    |        |                   |                   |        |
|----------------------------------------------|-----------|-------------------|--------------------|--------|-------------------|-------------------|--------|
| <b>Chronic Obstructive Pulmonary Disease</b> |           | 185 (8.5%)        | 112 (6.3%)         | 0.010  | 21 (7.5%)         | 88 (6.3%)         | 0.48   |
| <b>Asthma</b>                                |           | 200 (9.1%)        | 165 (9.3%)         | 0.89   | 19 (6.8%)         | 133 (9.6%)        | 0.14   |
| <b>Cancer</b>                                |           | 169 (7.7%)        | 78 (4.4%)          | <0.001 | 11 (3.9%)         | 65 (4.7%)         | 0.58   |
| <b>HIV</b>                                   |           | 21 (1.0%)         | 14 (0.8%)          | 0.56   | 3 (1.1%)          | 11 (0.8%)         | 0.64   |
| <b>Cerebrovascular Disease</b>               |           | 110 (5.0%)        | 96 (5.4%)          | 0.61   | 15 (5.4%)         | 75 (5.4%)         | 0.97   |
| <b>Dementia</b>                              |           | 156 (7.1%)        | 188 (10.5%)        | <0.001 | 29 (10.4%)        | 153 (11.0%)       | 0.74   |
| <b>Chronic Kidney Disease</b>                |           | 263 (12.0%)       | 233 (13.1%)        | 0.31   | 33 (11.8%)        | 182 (13.1%)       | 0.54   |
| <b>Cough</b>                                 |           | 537 (24.5%)       | 1114 (62.5%)       | <0.001 | 177 (63.2%)       | 865 (62.4%)       | 0.80   |
| <b>Shortness of breath</b>                   |           | 687 (31.4%)       | 1171 (65.7%)       | <0.001 | 203 (72.5%)       | 886 (63.9%)       | 0.006  |
| <b>Fever</b>                                 |           | 547 (25.0%)       | 1117 (62.7%)       | <0.001 | 184 (65.7%)       | 860 (62.0%)       | 0.25   |
| <b>Confusion</b>                             |           | 241 (11.0%)       | 195 (10.9%)        | 0.95   | 30 (10.7%)        | 153 (11.0%)       | 0.87   |
| <b>Symptom duration (days), median (IQR)</b> |           | 4 (2, 12) (n=592) | 7 (3, 10) (n=1083) | 0.010  | 7 (3, 12) (n=163) | 6 (3, 10) (n=844) | 0.021  |
| <b><u>Observations</u></b>                   |           |                   |                    |        |                   |                   |        |
| <b>Pulse &gt;120 bpm</b>                     |           | 203 (10.3%)       | 241 (14.3%)        | <0.001 | 41 (15.4%)        | 177 (13.4%)       | 0.39   |
| <b>Respiratory rate &gt;30 per minute</b>    |           | 175 (8.9%)        | 568 (33.6%)        | <0.001 | 90 (33.8%)        | 439 (33.3%)       | 0.87   |
| <b>Temperature &gt;38°C</b>                  |           | 180 (9.2%)        | 605 (35.9%)        | <0.001 | 72 (27.0%)        | 495 (37.7%)       | <0.001 |
| <b>Systolic Blood Pressure &lt;100 mmHg</b>  |           | 108 (5.5%)        | 101 (6.1%)         | 0.51   | 16 (6.1%)         | 78 (6.0%)         | 0.97   |
| <b>Consciousness level</b>                   | Alert     | 646 (95.1%)       | 596 (96.0%)        | 0.93   | 101 (97.1%)       | 449 (95.5%)       | 0.47   |
|                                              | Confusion | 13 (1.9%)         | 11 (1.8%)          |        | 3 (2.9%)          | 8 (1.7%)          |        |

|                                                       |              |                               |                               |        |                              |                               |        |
|-------------------------------------------------------|--------------|-------------------------------|-------------------------------|--------|------------------------------|-------------------------------|--------|
|                                                       | Verbal       | 8 (1.2%)                      | 5 (0.8%)                      |        | 0 (0.0%)                     | 4 (0.9%)                      |        |
|                                                       | Pain         | 5 (0.7%)                      | 3 (0.5%)                      |        | 0 (0.0%)                     | 3 (0.6%)                      |        |
|                                                       | Unresponsive | 7 (1.0%)                      | 6 (1.0%)                      |        | 0 (0.0%)                     | 6 (1.3%)                      |        |
| <b>O<sub>2</sub> saturations &lt;94%</b>              |              | 198 (10.1%)                   | 543 (32.2%)                   | <0.001 | 79 (29.8%)                   | 430 (32.6%)                   | 0.37   |
| <b>NEWS 2 Score, median (IQR)</b>                     |              | 2 (1, 4) (n=1951)             | 6 (3, 8) (n=1666)             | <0.001 | 6 (4, 7) (n=264)             | 6 (3, 8) (n=1299)             | 0.73   |
| <b>NEWS 2 Score ≥5</b>                                |              | 477 (24.4%)                   | 1084 (65.1%)                  | <0.001 | 176 (66.7%)                  | 840 (64.7%)                   | 0.53   |
| <b>Supplementary oxygen</b>                           |              | 169 (8.8%)                    | 529 (33.1%)                   | <0.001 | 96 (37.9%)                   | 404 (32.4%)                   | 0.091  |
| <b>PO<sub>2</sub> &lt;8 mmHg</b>                      |              | 127 (35.4%)                   | 251 (36.2%)                   | 0.79   | 34 (27.9%)                   | 205 (38.7%)                   | 0.025  |
| <b>PCO<sub>2</sub> &gt;6 mmHg</b>                     |              | 124 (34.5%)                   | 75 (10.8%)                    | <0.001 | 12 (9.8%)                    | 59 (11.1%)                    | 0.68   |
| <b>Neutrophils &gt;10 x10<sup>9</sup>/L</b>           |              | 361 (17.8%)                   | 250 (15.6%)                   | 0.083  | 52 (19.0%)                   | 183 (14.7%)                   | 0.078  |
| <b>Lymphocytes &lt;1 x10<sup>9</sup>/L</b>            |              | 509 (25.1%)                   | 736 (46.1%)                   | <0.001 | 107 (39.1%)                  | 594 (47.8%)                   | 0.009  |
| <b>Platelet count x10<sup>9</sup>/L, median (IQR)</b> |              | 246.0 (193.0, 317.0) (n=2025) | 231.0 (177.0, 306.0) (n=1597) | <0.001 | 263.0 (206.0, 343.0) (n=274) | 226.0 (172.0, 297.0) (n=1242) | <0.001 |
| <b>Creatinine &gt;120 mmol/L</b>                      |              | 507 (25.2%)                   | 426 (26.9%)                   | 0.24   | 64 (23.8%)                   | 338 (27.4%)                   | 0.23   |
| <b>CRP µg/mL, median (IQR)</b>                        |              | 16.1 (3.4, 66.9) (n=1928)     | 98.7 (46.0, 175.3) (n=1590)   | <0.001 | 86.2 (41.7, 170.1) (n=272)   | 101.5 (48.3, 180.2) (n=1237)  | 0.15   |
| <b>Influenza RT-PCR</b>                               | Influenza A  | 11 (2.3%) (n=490)             | 1 (0.2%) (n=528)              | <0.001 | 0 (n=72)                     | 1 (0.2%) (n=445)              | 0.31   |
|                                                       | Influenza B  | 9 (1.9%)                      | 2 (0.4%)                      |        | 1 (1.4%)                     | 1 (0.2%)                      |        |

**Table 1.** Baseline characteristics for patients, including demographics, co-morbidities, admission vital signs and laboratory blood tests, stratified by diagnosis and SARS- CoV-2 RT-PCR status. Data on com-morbidities represents number with each condition. Where data are missing,

1  
2 numbers in each category are presented. P-values are calculated using chi-squared for proportions, t-tests for means and Wilcoxon rank sum  
3 for medians. CRP C-reactive Protein, IQR inter quartile range. NEWS National Early Warning Score. PO2 partial pressure of oxygen, PCO2  
4 partial pressure of carbon dioxide.  
5  
6  
7  
8  
9  
10  
11  
12  
13  
14  
15  
16  
17  
18  
19  
20  
21  
22  
23  
24  
25  
26  
27  
28  
29  
30  
31  
32  
33  
34  
35  
36  
37  
38  
39  
40  
41  
42

For peer review only

1  
2  
3  
4  
5  
6  
7  
8  
9  
10  
11  
12  
13  
14  
15  
16  
17  
18  
19  
20  
21  
22  
23  
24  
25  
26  
27  
28  
29  
30  
31  
32  
33  
34  
35  
36  
37  
38  
39  
40  
41  
42  
43  
44  
45  
46

For peer review only

| Variable |                   | N     | Univariable Regression |         | Multivariable regression |         |
|----------|-------------------|-------|------------------------|---------|--------------------------|---------|
|          |                   |       | Odds Ratio (95% CI)    | p       | Odds Ratio (95% CI)      | p       |
| Age      | increase 10 years | 4,008 | 1.05 (1 - 1.08)        | 0.015   |                          |         |
|          | 50-70             | 4,008 | 1.62 (1.4 - 1.86)      | <0.0001 | 1.7 (1.4 - 2.08)         | <0.0001 |
| Sex      | Male              | 4,008 | 1.5 (1.3 - 1.71)       | <0.0001 | 1.26 (1.1 - 1.52)        | <0.0001 |
|          | IMD Decile        | 3,848 | 0.97 (0.9 - 1)         | 0.013   |                          |         |
| Diabetes |                   | 3,971 | 1.46 (1.3 - 1.68)      | <0.0001 |                          |         |

|                           |                     |       |                   |         |                   |         |
|---------------------------|---------------------|-------|-------------------|---------|-------------------|---------|
| <b>Hypertension</b>       |                     | 3,971 | 1.17 (1 - 1.33)   | 0.007   |                   |         |
| <b>Ethnicity</b>          |                     | 4,008 |                   |         |                   |         |
|                           | White               | 1,348 |                   | <0.0001 |                   | <0.0001 |
|                           | Asian               | 1,318 | 1.94 (1.7 - 2.26) |         | 1.82 (1.5 - 2.27) |         |
|                           | Black               | 436   | 2.05 (1.6 - 2.56) |         | 1.85 (1.4 - 2.53) |         |
|                           | Mixed/ Other        | 258   | 2.13 (1.6 - 2.79) |         | 2.25 (1.5 - 3.33) |         |
|                           | Unknown             | 648   | 1.87 (1.5 - 2.27) |         | 1.77 (1.3 - 2.34) |         |
| <b>Symptoms</b>           |                     | 3,971 |                   |         |                   |         |
|                           | Cough               |       | 5.13 (4.5 - 5.88) | <0.0001 |                   |         |
|                           | Shortness of breath |       | 4.19 (3.7 - 4.79) | <0.0001 |                   |         |
|                           | Fever               |       | 5.04 (4.4 - 5.78) | <0.0001 |                   |         |
| <b>Respiratory rate</b>   | Any of above        | 4,008 | 6.29 (5.4 - 7.36) | <0.0001 | 3.11 (2.5 - 3.85) | <0.0001 |
| <b>Oxygen saturations</b> |                     | 3,654 | 1.14 (1.1 - 1.15) | <0.0001 |                   |         |

|                    |                        |           |                   |             |                   |             |
|--------------------|------------------------|-----------|-------------------|-------------|-------------------|-------------|
| <b>NEWS Score</b>  | Continuous<br>(linear) | 3,64<br>7 | 0.89 (0.9 - 0.9)  | <0.000<br>1 |                   |             |
|                    | Continuous<br>(linear) | 3,61<br>7 | 1.39 (1.3 - 1.42) | <0.000<br>1 |                   |             |
| <b>CRP</b>         | >5                     |           | 5.76 (5 - 6.65)   | <0.000<br>1 | 2.39 (2 - 2.87)   | <0.000<br>1 |
|                    | every 10 increase      | 3,51<br>8 | 1.01 (1 - 1.01)   | <0.000<br>1 |                   |             |
| <b>Lymphocytes</b> | >50                    |           | 5.99 (5.2 - 6.93) | <0.000<br>1 | 3.11 (2.6 - 3.75) | <0.000<br>1 |
|                    | Continuous<br>(linear) | 3,62<br>4 | 0.66 (0.6 - 0.72) | <0.000<br>1 |                   |             |
| <b>Chest x-ray</b> | <1                     |           | 2.54 (2.2 - 2.93) | <0.000<br>1 | 1.72 (1.4 - 2.08) | <0.000<br>1 |
|                    |                        | 3,58<br>1 |                   |             |                   |             |
|                    | Normal                 | 718<br>1  |                   | <0.000<br>1 | 1                 | <0.000<br>1 |
|                    | lung infiltrates       | 2,26<br>2 | 7.79 (6.3 - 9.65) |             | 3.75 (2.9 - 4.91) |             |
|                    | other abnormality      | 601       | 3.56 (2.8 - 4.6)  |             | 1.94 (1.4 - 2.68) |             |
|                    | CVCX0                  | 424<br>1  |                   | <0.000<br>1 |                   |             |

|  |       |       |                      |  |  |  |
|--|-------|-------|----------------------|--|--|--|
|  | CVCX1 | 1,040 | 25.85 (18.7 - 35.66) |  |  |  |
|  | CVCX2 | 435   | 2.98 (2.3 - 3.93)    |  |  |  |
|  | CVCX3 | 129   | 1.64 (1.1 - 2.44)    |  |  |  |

**Table 2.** Univariable and multivariable logistic regression analysis for risk of COVID-19 diagnosis. P-values calculated using likelihood ratio tests. There was no evidence of interaction between variables in the final multivariable model. N=2,490 for multivariable model. CVCX represents British Society of Thoracic Imaging (BSTI) classification of chest x-ray. CRP C-reactive Protein



| <u>Variable</u>                            |                          | <b>Coefficient</b> | <b>Standard error</b> | <b>Diagnsotic score points</b> |
|--------------------------------------------|--------------------------|--------------------|-----------------------|--------------------------------|
| <b>Age</b>                                 | <b>50-70</b>             | 0.53 (0 - 0.41)    | 0.09                  | 1                              |
| <b>Sex</b>                                 | <b>Male</b>              | 0.23 (0.3 - 0.73)  | 0.10                  | 1                              |
| <b>Ethnicity</b>                           | <b>Asian</b>             | 0.6 (0.4 - 0.82)   | 0.11                  | 1                              |
|                                            | <b>Black</b>             | 0.62 (0.3 - 0.93)  | 0.16                  | 1                              |
|                                            | <b>Mixed/Other</b>       | 0.81 (0.4 - 1.2)   | 0.20                  | 1                              |
|                                            | <b>Unknown</b>           | 0.57 (0.3 - 0.85)  | 0.14                  | 1                              |
| <b>Cough, fever or shortness of breath</b> |                          | 1.13 (0.9 - 1.35)  | 0.11                  | 2                              |
| <b>NEWS2 Score</b>                         | <b>&gt;5</b>             | 0.87 (0.7 - 1.05)  | 0.09                  | 2                              |
| <b>CRP</b>                                 | <b>&gt;50</b>            | 1.13 (1 - 1.32)    | 0.09                  | 2                              |
| <b>Lymphocytes</b>                         | <b>&lt;1</b>             | 0.54 (0.4 - 0.73)  | 0.10                  | 1                              |
| <b>Chest x-ray</b>                         | <b>lung infiltrates</b>  | 1.32 (1.1 - 1.59)  | 0.14                  | 2                              |
|                                            | <b>other abnormality</b> | 0.66 (0.3 - 0.98)  | 0.16                  | 1                              |

**Table 3.** Multivariable logistic regression diagnostic model for COVID-19, with regression ( $\beta$ ) co-efficients and diagnostic score points. The constant (intercept) was -4.0 (95% ci -4.4 to -3.6). N= 2,940.

| <b>Low-risk diagnostic score threshold (&lt;4)</b> | <b>Study population</b> | <b>Prevalence</b> |            |            |             |             |
|----------------------------------------------------|-------------------------|-------------------|------------|------------|-------------|-------------|
|                                                    |                         | <b>0.5</b>        | <b>0.2</b> | <b>0.1</b> | <b>0.05</b> | <b>0.01</b> |
| <b>Sensitivity</b>                                 | 26.6%                   | -                 | -          | -          | -           | -           |
| <b>Specificity</b>                                 | 96.6%                   | -                 | -          | -          | -           | -           |
| <b>PPV</b>                                         | 89.0%                   | 88.7%             | 66.2%      | 46.6%      | 29.2%       | 7.3%        |
| <b>NPV</b>                                         | 56.0%                   | 56.8%             | 84.0%      | 92.2%      | 96.2%       | 99.2%       |
|                                                    |                         |                   |            |            |             |             |
|                                                    |                         |                   |            |            |             |             |

|                                                     |       |       |       |       |       |       |
|-----------------------------------------------------|-------|-------|-------|-------|-------|-------|
| <b>High-risk diagnostic score threshold (&gt;9)</b> |       |       |       |       |       |       |
| <b>Sensitivity</b>                                  | 37.0% | -     | -     | -     | -     | -     |
| <b>Specificity</b>                                  | 96.1% | -     | -     | -     | -     | -     |
| <b>PPV</b>                                          | 90.1% | 90.4% | 70.1% | 51.0% | 33.0% | 8.6%  |
| <b>NPV</b>                                          | 61.2% | 60.4% | 85.9% | 93.2% | 96.7% | 99.3% |

**Table 4.** Diagnostic performance of a low COVID-19 risk threshold (less than 4 points on the diagnostic score) and high-risk threshold (greater than 9 points). Low-risk threshold diagnostic accuracy is for identifying patients without COVID-19, whereas high-risk threshold is for identifying patients with COVID-19

**Figure 1.** Patient flow diagram by final diagnosis and SARS-CoV-2 RT-PCR status with outcomes. Note 'presumed COVID' includes patients who were RT-PCR negative (n=293) and those who did not have a valid RT-PCR results (n=109)

**Figure 2.** (A) Receiver operator curve for the full diagnostic predictive model. Area under the curve (AUC) 0.839 (95%CI 0.824-0.853), N=2,940. (B) Calibration plot showing observed compared to predicted risk of COVID-19 diagnosis as deciles, with 95% confidence interval. The dashed green line shows perfect calibration. (C) Decision curve analysis showing standardised net benefit at different threshold probabilities for diagnosing patients with COVID-19, comparing diagnosing all patients as COVID-19 (blue solid line), diagnosing no patients with COVID-19 (solid red line), and various diagnostic risk models, including the COVID diagnostic score (full model and simplified risk score), C-reactive protein over 50, and National Early Warning Score of 5 or more. CRP C-reactive Protein, NEWS National Early Warning Score

**Figure 3.** (A) Overlaid histogram of COVID diagnostic risk score and number of patients with COVID-19 (white) and alternative (not COVID-19) diagnoses. (B) Proportion (%) of patients with COVID-19 (orange) or alternative (not COVID-19, blue) diagnoses by COVID diagnostic risk score. N=2,940

## References

- 1 Long C, Xu H, Shen Q, *et al.* Diagnosis of the Coronavirus disease (COVID-19): rRT-PCR or CT? *Eur J Radiol* 2020; **126**. DOI:10.1016/j.ejrad.2020.108961.
- 2 Arevalo-Rodriguez I, Buitrago-Garcia D, Simancas-Racines D, *et al.* False-Negative Results of Initial Rt-Pcr Assays for Covid-19: a Systematic Review. 2020; : 1–26.
- 3 Woloshin S, Patel N, Kesselheim AS. False Negative Tests for SARS-CoV-2 Infection - Challenges and Implications. *N Engl J Med* 2020; **383**: e38.
- 4 Xie X, Zhong Z, Zhao W, Zheng C, Wang F, Liu J. Chest CT for Typical 2019-nCoV Pneumonia: Relationship to Negative RT-PCR Testing. *Radiology* 2020; : 200343.
- 5 Brogna B, Bignardi E, Brogna C, *et al.* Typical CT findings of COVID-19 pneumonia in patients presenting with repetitive negative RT-PCR. *Radiography* 2020. DOI:10.1016/j.radi.2020.09.012.
- 6 Watson J, Whiting PF, Brush JE. Interpreting a covid-19 test result. *BMJ* 2020; **369**: 1–7.
- 7 Jang S, Rhee J-Y, Wi YM, Jung BK. Viral Kinetics of SARS-CoV-2 over the preclinical, clinical, and postclinical period. *Int J Infect Dis* 2020; published online Nov. DOI:10.1016/j.ijid.2020.10.099.
- 8 Guan W, Ni Z, Hu Y, *et al.* Clinical characteristics of coronavirus disease 2019 in China. *N Engl J Med* 2020; **382**: 1708–20.
- 9 Docherty AB, Harrison EM, Green CA, *et al.* Features of 20 133 UK patients in hospital with covid-19 using the ISARIC WHO Clinical Characterisation Protocol: Prospective observational cohort study. *BMJ* 2020; **369**. DOI:10.1136/bmj.m1985.
- 10 Richardson S, Hirsch JS, Narasimhan M, *et al.* Presenting Characteristics, Comorbidities, and Outcomes Among 5700 Patients Hospitalized With COVID-19 in the New York City Area. *Jama* 2020; **10022**: 1–8.
- 11 Wynants L, Van Calster B, Collins GS, *et al.* Prediction models for diagnosis and prognosis of covid-19: Systematic review and critical appraisal. *BMJ* 2020; **369**. DOI:10.1136/bmj.m1328.
- 12 British Society of Thoracic Imaging. COVID-19 CXR Report Proforma. .
- 13 Knight SR, Ho A, Pius R, *et al.* Risk stratification of patients admitted to hospital with covid-19 using the ISARIC WHO Clinical Characterisation Protocol: Development and validation of the 4C Mortality Score. *BMJ* 2020; **370**: 1–13.
- 14 Baik Y, Rickman HM, Hanrahan CF, *et al.* A clinical score for identifying active tuberculosis while awaiting microbiological results: Development and validation of a multivariable prediction model in sub-Saharan Africa. *PLOS Med* 2020; **17**: e1003420.
- 15 Altman DG, Vergouwe Y, Royston P, Moons KGM. Prognosis and prognostic research:

- 1  
2  
3  
4 Validating a prognostic model. *BMJ* 2009; **338**: 1432–5.
- 5  
6 16 Collins GS, Reitsma JB, Altman DG, Moons KGM. Transparent reporting of a  
7  
8 multivariable prediction model for individual prognosis or diagnosis (TRIPOD): The  
9  
10 TRIPOD Statement. *BMC Med* 2015; **13**: 1.
- 11  
12 17 De Angelis G, Posteraro B, Biscetti F, *et al*. Confirmed or unconfirmed cases of 2019  
13  
14 novel coronavirus pneumonia in Italian patients: a retrospective analysis of clinical  
15  
16 features. *BMC Infect Dis* 2020; **20**. DOI:10.1186/s12879-020-05504-7.
- 17  
18 18 Tang Y-W, Schmitz JE, Persing DH, Stratton CW. Laboratory Diagnosis of COVID-19:  
19  
20 Current Issues and Challenges. 2020  
21  
22 [www.chinamerlin.com/en/index.php?pproducts\\_show&id166&s\\_id&c\\_id68&](http://www.chinamerlin.com/en/index.php?pproducts_show&id166&s_id&c_id68&) (accessed  
23  
24 Oct 15, 2020).
- 25  
26 19 Gibani MM, Toumazou C, Sohbaty M, *et al*. Assessing a novel, lab-free, point-of-care  
27  
28 test for SARS-CoV-2 (CovidNudge): a diagnostic accuracy study. *The Lancet Microbe*  
29  
30 2020; **0**. DOI:10.1016/s2666-5247(20)30121-x.
- 31  
32 20 Salameh JP, Leeflang MMG, Hooft L, *et al*. Thoracic imaging tests for the diagnosis of  
33  
34 COVID-19. *Cochrane Database Syst Rev* 2020; **2020**.  
35  
36 DOI:10.1002/14651858.CD013639.pub2.
- 37  
38 21 Wake RM, Morgan M, Choi J, Winn S. Reducing nosocomial transmission of COVID-19:  
39  
40 implementation of a COVID-19 triage system. *Clin Med* 2020; **20**: e141–5.
- 41  
42 22 Patterson B, Marks M, Martinez-Garcia G, *et al*. A novel cohorting and isolation strategy  
43  
44 for suspected COVID-19 cases during a pandemic. *J Hosp Infect* 2020; **105**: 632–7.
- 45  
46 23 Pormohammad A, Ghorbani S, Khatami A, *et al*. Comparison of influenza type A and B  
47  
48 with COVID-19: A global systematic review and meta-analysis on clinical, laboratory and  
49  
50 radiographic findings. *Rev Med Virol* 2020; published online Oct 9.  
51  
52 DOI:10.1002/rmv.2179.
- 53  
54 24 Zheng S, Fan J, Yu F, *et al*. Viral load dynamics and disease severity in patients  
55  
56 infected with SARS-CoV-2 in Zhejiang province, China, January-March 2020:  
57  
58 Retrospective cohort study. *BMJ* 2020; **369**. DOI:10.1136/bmj.m1443.
- 59  
60 25 To KKW, Tsang OTY, Leung WS, *et al*. Temporal profiles of viral load in posterior  
oropharyngeal saliva samples and serum antibody responses during infection by SARS-  
CoV-2: an observational cohort study. *Lancet Infect Dis* 2020; **20**: 565–74.
- 26  
27 26 Xiao AT, Tong YX, Gao C, Zhu L, Zhang YJ, Zhang S. Dynamic profile of RT-PCR  
28  
29 findings from 301 COVID-19 patients in Wuhan, China: A descriptive study. *J Clin Virol*  
30  
31 2020; **127**: 104346.
- 32  
33 27 NHS Digital. Summary Hospital-level Mortality Indicator (SHMI) - Deaths associated with  
34  
35 hospitalisation, England, March 2019 - February 2020. 2020. <https://digital.nhs.uk/data->

- 1  
2  
3  
4 and-information/publications/statistical/shmi/2020-07/shmi-march-2019---february-2020  
5 (accessed Oct 14, 2020).  
6  
7 28 Lynn RM, Avis JL, Lenton S, Amin-Chowdhury Z, Ladhani SN. Delayed access to care  
8 and late presentations in children during the COVID-19 pandemic: A snapshot survey of  
9 4075 paediatricians in the UK and Ireland. *Arch. Dis. Child.* 2020; **0**.  
10 DOI:10.1136/archdischild-2020-319848.  
11  
12  
13 29 Pessoa-Amorim G, Camm CF, Gajendragadkar P, *et al.* Admission of patients with  
14 STEMI since the outbreak of the COVID-19 pandemic: a survey by the European  
15 Society of Cardiology. *Eur Hear journal Qual care Clin outcomes* 2020; **6**: 210–6.  
16  
17  
18  
19  
20  
21  
22  
23  
24  
25  
26  
27  
28  
29  
30  
31  
32  
33  
34  
35  
36  
37  
38  
39  
40  
41  
42  
43  
44  
45  
46  
47  
48  
49  
50  
51  
52  
53  
54  
55  
56  
57  
58  
59  
60

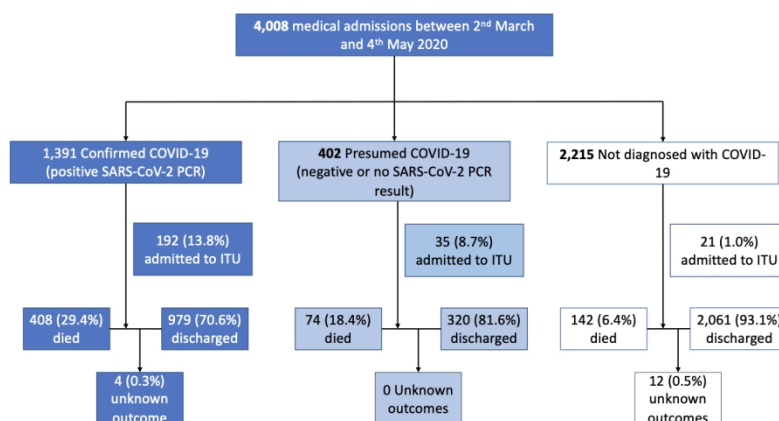

Figure 1

297x209mm (150 x 150 DPI)

1  
2  
3  
4  
5  
6  
7  
8  
9  
10  
11  
12  
13  
14  
15  
16  
17  
18  
19  
20  
21  
22  
23  
24  
25  
26  
27  
28  
29  
30  
31  
32  
33  
34  
35  
36  
37  
38  
39  
40  
41  
42  
43  
44  
45  
46  
47  
48  
49  
50  
51  
52  
53  
54  
55  
56  
57  
58  
59  
60

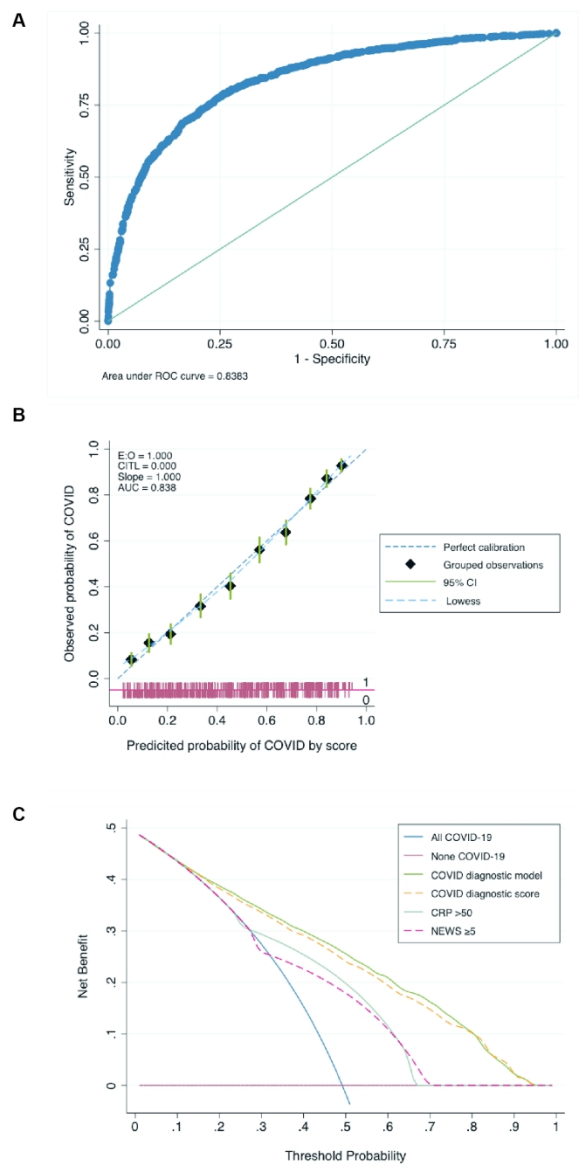

Figure 2

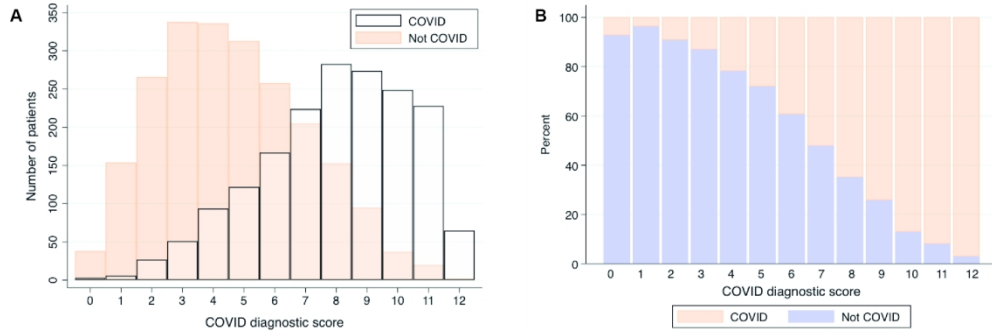

Figure 3



1  
2  
3 **Supplementary Appendix-** False-negative RT-PCR for COVID-19 and a diagnostic risk score: a  
4 retrospective cohort study among patients admitted to hospital  
5  
6  
7  
8  
9  
10  
11  
12  
13  
14  
15  
16  
17  
18  
19  
20  
21  
22  
23  
24  
25  
26  
27  
28  
29  
30  
31  
32  
33  
34  
35  
36  
37  
38  
39  
40  
41  
42  
43  
44  
45  
46  
47  
48  
49  
50  
51  
52  
53  
54  
55  
56  
57  
58  
59  
60

For peer review only

|                                            |     | Not diagnosed with COVID   | All COVID diagnoses        | p-value | COVID negative PCR       | COVID diagnosis PCR positive | p-value |
|--------------------------------------------|-----|----------------------------|----------------------------|---------|--------------------------|------------------------------|---------|
|                                            |     | n=2215                     | n=1793                     |         | n=283                    | n=1391                       |         |
| <b>Symptoms</b>                            |     |                            |                            |         |                          |                              |         |
| Cough                                      |     | 537 (24.5%)                | 1114 (62.5%)               | <0.001  | 177 (63.2%)              | 865 (62.4%)                  | 0.80    |
| Chest pain                                 |     | 335 (15.3%)                | 109 (6.1%)                 | <0.001  | 23 (8.2%)                | 80 (5.8%)                    | 0.12    |
| Diarrhoea                                  |     | 152 (6.9%)                 | 131 (7.4%)                 | 0.62    | 25 (8.9%)                | 96 (6.9%)                    | 0.24    |
| Fall                                       |     | 277 (12.7%)                | 166 (9.3%)                 | <0.001  | 24 (8.6%)                | 129 (9.3%)                   | 0.70    |
| Symptom duration (days), median (IQR)      |     | 4 (2, 12) (n=592)          | 7 (3, 10) (n=1083)         | 0.010   | 7 (3, 12) (n=163)        | 6 (3, 10) (n=844)            | 0.021   |
| <b>Observations</b>                        |     |                            |                            |         |                          |                              |         |
| Pulse, median (IQR)                        |     | 89 (75, 106) (n=1964)      | 96 (83, 110) (n=1689)      | <0.001  | 98 (85, 110) (n=266)     | 96 (83, 110) (n=1319)        | 0.050   |
| Pulse >120 bpm                             |     | 203 (10.3%)                | 241 (14.3%)                | <0.001  | 41 (15.4%)               | 177 (13.4%)                  | 0.39    |
| Respiratory rate per minute, median (IQR)  |     | 20 (18, 23) (n=1966)       | 26 (21, 32) (n=1688)       | <0.001  | 26 (22, 32) (n=266)      | 26 (20, 32) (n=1318)         | 0.59    |
| Respiratory rate >30 per minute            |     | 175 (8.9%)                 | 568 (33.6%)                | <0.001  | 90 (33.8%)               | 439 (33.3%)                  | 0.87    |
| Temperature °C, median (IQR)               |     | 36.7 (36.4, 37.1) (n=1961) | 37.5 (36.8, 38.4) (n=1684) | <0.001  | 37.3 (36.7, 38) (n=267)  | 37.5 (36.8, 38.4) (n=1313)   | 0.007   |
| Temperature >38°C                          |     | 180 (9.2%)                 | 605 (35.9%)                | <0.001  | 72 (27.0%)               | 495 (37.7%)                  | <0.001  |
| Systolic Blood Pressure mmHg, median (IQR) |     | 136 (119, 154) (n=1948)    | 132 (117, 147) (n=1666)    | <0.001  | 131 (118, 146.5) (n=264) | 132 (117, 148) (n=1299)      | 0.88    |
| Systolic Blood Pressure mmHg <100          |     | 108 (5.5%)                 | 101 (6.1%)                 | 0.51    | 16 (6.1%)                | 78 (6.0%)                    | 0.97    |
| O <sub>2</sub> saturations %, median (IQR) |     | 97 (96, 99) (n=1961)       | 96 (92, 97) (n=1686)       | <0.001  | 95 (93, 98) (n=265)      | 96 (92, 97) (n=1317)         | 0.55    |
| O <sub>2</sub> saturations <94%            |     | 198 (10.1%)                | 543 (32.2%)                | <0.001  | 79 (29.8%)               | 430 (32.6%)                  | 0.37    |
| NEWS 2 Score, median (IQR)                 |     | 2 (1, 4) (n=1951)          | 6 (3, 8) (n=1666)          | <0.001  | 6 (4, 7) (n=264)         | 6 (3, 8) (n=1299)            | 0.73    |
| NEWS 2 Score ≥5                            |     | 477 (24.4%)                | 1084 (65.1%)               | <0.001  | 176 (66.7%)              | 840 (64.7%)                  | 0.53    |
| Supplementary oxygen                       | Yes | 169 (8.8%)                 | 529 (33.1%)                | <0.001  | 96 (37.9%)               | 404 (32.4%)                  | 0.091   |

|                                                      |  |                                  |                                |        |                                 |                                  |        |
|------------------------------------------------------|--|----------------------------------|--------------------------------|--------|---------------------------------|----------------------------------|--------|
|                                                      |  |                                  |                                |        |                                 |                                  |        |
| <b>Blood gas and pathology</b>                       |  |                                  |                                |        |                                 |                                  |        |
| PO <sub>2</sub> (KPa), median (IQR)                  |  | 8.8 (7.3, 11.1)<br>(n=359)       | 8.7 (7.4, 10.7)<br>(n=693)     | 0.51   | 9.1 (7.7, 10.6)<br>(n=122)      | 8.5 (7.3, 10.7)<br>(n=530)       | 0.18   |
| PO <sub>2</sub> <8 v                                 |  | 127 (35.4%)                      | 251 (36.2%)                    | 0.79   | 34 (27.9%)                      | 205 (38.7%)                      | 0.025  |
| pCO <sub>2</sub> (KPa), median (IQR)                 |  | 5.2 (4.4, 6.7) (n=359)           | 4.6 (4.1, 5.2)<br>(n=693)      | <0.001 | 4.6 (4.1, 5.2)<br>(n=122)       | 4.6 (4.1, 5.2) (n=530)           | 0.83   |
| pCO <sub>2</sub> >6                                  |  | 124 (34.5%)                      | 75 (10.8%)                     | <0.001 | 12 (9.8%)                       | 59 (11.1%)                       | 0.68   |
| Haemoglobin (g/L), mean (SD)                         |  | 121.7 (23.2) (n=2026)            | 124.4 (21.1)<br>(n=1598)       | <0.001 | 122.2 (21.0)<br>(n=274)         | 124.6 (20.9) (n=1243)            | 0.085  |
| Neutrophil count (x10 <sup>9</sup> /L), median (IQR) |  | 5.9 (4.1, 8.6)<br>(n=2026)       | 5.8 (4.0, 8.3)<br>(n=1598)     | 0.20   | 6.7 (4.5, 9.1)<br>(n=274)       | 5.6 (3.9, 8.0)<br>(n=1243)       | <0.001 |
| Neutrophils >10 x10 <sup>9</sup> /L                  |  | 361 (17.8%)                      | 250 (15.6%)                    | 0.083  | 52 (19.0%)                      | 183 (14.7%)                      | 0.078  |
| Lymphocyte count (x10 <sup>9</sup> /L), median (IQR) |  | 1.4 (0.9, 2.0)<br>(n=2026)       | 1.0 (0.7, 1.4)<br>(n=1598)     | <0.001 | 1.1 (0.8, 1.4)<br>(n=274)       | 1.0 (0.7, 1.4)<br>(n=1243)       | 0.013  |
| Lymphocytes <1 x10 <sup>9</sup> /L                   |  | 509 (25.1%)                      | 736 (46.1%)                    | <0.001 | 107 (39.1%)                     | 594 (47.8%)                      | 0.009  |
| Platelet count (x10 <sup>9</sup> /L), median (IQR)   |  | 246.0 (193.0, 317.0)<br>(n=2025) | 231.0 (177.0, 306.0) (n=1597)  | <0.001 | 263.0 (206.0, 343.0)<br>(n=274) | 226.0 (172.0, 297.0)<br>(n=1242) | <0.001 |
| Platelets <100 x10 <sup>9</sup> /L                   |  | 80 (4.0%)                        | 62 (3.9%)                      | 0.92   | 11 (4.0%)                       | 50 (4.0%)                        | 0.99   |
| ALT, median (IQR)                                    |  | 22.0 (15.0, 36.0)<br>(n=1755)    | 31.0 (18.0, 51.0)<br>(n=1412)  | <0.001 | 31.0 (18.0, 55.0)<br>(n=245)    | 30.0 (19.0, 51.0)<br>(n=1096)    | 0.71   |
| Creatinine (mmol/L), median (IQR)                    |  | 84.0 (65.0, 121.0)<br>(n=2011)   | 86.0 (67.0, 124.0)<br>(n=1582) | 0.057  | 80.0 (65.0, 117.0)<br>(n=269)   | 87.0 (68.0, 127.0)<br>(n=1235)   | 0.011  |
| Creatinine >120 mmol/L                               |  | 507 (25.2%)                      | 426 (26.9%)                    | 0.24   | 64 (23.8%)                      | 338 (27.4%)                      | 0.23   |
| Urea (mmol/L), median (IQR)                          |  | 6.0 (4.0, 9.8)<br>(n=2025)       | 6.1 (4.0, 10.6)<br>(n=1584)    | 0.58   | 5.5 (3.8, 8.9)<br>(n=270)       | 6.4 (4.1, 11.0)<br>(n=1236)      | 0.007  |
| CRP µg/mL, median (IQR)                              |  | 16.1 (3.4, 66.9)<br>(n=1928)     | 98.7 (46.0, 175.3)<br>(n=1590) | <0.001 | 86.2 (41.7, 170.1)<br>(n=272)   | 101.5 (48.3, 180.2)<br>(n=1237)  | 0.15   |
| CRP >50 µg/mL                                        |  | 599 (31.1%)                      | 1160 (73.0%)                   | <0.001 | 191 (70.2%)                     | 917 (74.1%)                      | 0.19   |
| Glucose (mmol/L), median (IQR)                       |  | 6.6 (5.6, 8.5)<br>(n=1182)       | 7.1 (5.9, 9.3)<br>(n=910)      | <0.001 | 6.7 (5.9, 9.1)<br>(n=147)       | 7.1 (5.9, 9.3) (n=710)           | 0.49   |
| Lactate >2 mmol/L                                    |  | 41 (3.5%)                        | 30 (3.3%)                      | 0.83   | 5 (3.4%)                        | 21 (3.0%)                        | 0.78   |

1  
2  
3 **Supplementary Table 1.** Baseline characteristics for patients, including co-morbidities, admission vital signs and laboratory blood tests, stratified by diagnosis  
4 and SARS- CoV-2 RT-PCR status. Data on com-morbidities represents number with each condition. Where data are missing, numbers in each category are  
5 presented. P-values are calculated using chi-squared for proportions, t-tests for means and Wilcoxon rank sum for medians. CRP C-reactive Protein, IQR inter  
6 quartile range. NEWS National Early Warning Score. PO2 partial pressure of oxygen, PCO2 partial pressure of carbon dioxide.  
7  
8  
9  
10  
11  
12  
13  
14  
15  
16  
17  
18  
19  
20  
21  
22  
23  
24  
25  
26  
27  
28  
29  
30  
31  
32  
33  
34  
35  
36  
37  
38  
39  
40  
41  
42  
43  
44  
45  
46

For peer review only

| Variable                 |           | Odds ratio (95% CI) | P-value |
|--------------------------|-----------|---------------------|---------|
| COVID-19 RT-PCR negative |           | 0.41 (0.3 - 0.6)    | <0.0001 |
| Age, years               |           | 1.06 (1.0 - 1.1)    | <0.0001 |
| Sex                      | Female    | 0.90 (0.7 - 1.2)    | 0.446   |
| Co-morbidities           | 1         | 1.13 (0.8 - 1.7)    | 0.552   |
|                          | 2 or more | 1.45 (1.0 - 2.1)    | 0.042   |
| CRP                      |           | 1.00 (1.0 - 1.0)    | <0.0001 |
| Oxygen Saturations <94%  |           | 1.41 (1.1 - 1.9)    | 0.016   |
| Urea                     |           | 1.04 (1 - 1.1)      | <0.0001 |

**Supplementary Table 2.** Multivariable logistic regression model assessing association between COVID-19 PCR-status and mortality, adjusting for other variables known to be risk-factors for mortality in COVID-19. Continuous variables modelled as linear. No interactions in the final model. P-values calculated by likelihood ratio tests. N= 1,414.

| Variable                            |                   | $\beta$ -Coefficient | Odds ratio (95% CI) | Diagnostic score points |
|-------------------------------------|-------------------|----------------------|---------------------|-------------------------|
| Age                                 | 50-70             | 0.4 (0.2 - 0.6)      | 1.5 (1.2-1.8)       | 1                       |
| Sex                                 | Male              | 0.2 (0.0 - 0.3)      | 1.2 (1.0-1.4)       | 1                       |
| Ethnicity                           | Asian             | 0.6 (0.4 - 0.8)      | 1.8 (1.4-2.1)       | 1                       |
|                                     | Black             | 0.6 (0.4 - 0.9)      | 1.9 (1.4-2.5)       | 1                       |
|                                     | Mixed/Other       | 0.8 (0.4 - 1.1)      | 2.2 (1.5-3.1)       | 1                       |
|                                     | Unknown           | 0.5 (0.3 - 0.8)      | 1.7 (1.3-2.2)       | 1                       |
| Cough, fever or shortness of breath |                   | 1.3 (1.2 - 1.5)      | 3.8 (3.2-4.5)       | 2                       |
| NEWS2 Score                         | >5                | 0.9 (0.7 - 1.1)      | 2.4 (2.0-2.9)       | 2                       |
| CRP                                 | >50               | 1.1 (1.0 - 1.3)      | 3.0 (2.6-3.7)       | 2                       |
| Lymphocytes                         | <1                | 0.6 (0.4 - 0.8)      | 1.8 (1.5 - 2.2)     | 1                       |
| Chest x-ray                         | lung infiltrates  | 1.3 (1.0 - 1.5)      | 3.6 (2.8 - 4.5)     | 2                       |
|                                     | other abnormality | 0.7 (0.4 - 0.9)      | 1.9 (1.4-2.6)       | 1                       |

**Supplementary Table 3.** Logistic regression multivariable model for COVID-19 diagnosis using multivariate multiple imputation using chained equations for missing data in candidate predictor variables, with odds ratio and  $\beta$  co-efficients. N=3,968. Area under the receiver operator curve (ROC) = 0.86 (95% CI 0.84 - 0.87).

| Low-risk diagnostic score threshold (<4)  | Study population | Prevalence |       |       |       |       |
|-------------------------------------------|------------------|------------|-------|-------|-------|-------|
|                                           |                  | 0.5        | 0.2   | 0.1   | 0.05  | 0.01  |
| Sensitivity                               | 26.6%            | -          | -     | -     | -     | -     |
| Specificity                               | 96.6%            | -          | -     | -     | -     | -     |
| PPV                                       | 89.0%            | 88.7%      | 66.2% | 46.6% | 29.2% | 7.3%  |
| NPV                                       | 56.0%            | 56.8%      | 84.0% | 92.2% | 96.2% | 99.2% |
|                                           |                  |            |       |       |       |       |
|                                           |                  |            |       |       |       |       |
| High-risk diagnostic score threshold (>9) | Study population | 0.5        | 0.2   | 0.1   | 0.05  | 0.01  |
| Sensitivity                               | 37.0%            | -          | -     | -     | -     | -     |
| Specificity                               | 96.1%            | -          | -     | -     | -     | -     |
| PPV                                       | 90.1%            | 90.4%      | 70.1% | 51.0% | 33.0% | 8.6%  |
| NPV                                       | 61.2%            | 60.4%      | 85.9% | 93.2% | 96.7% | 99.3% |

**Supplementary Table 4.** Diagnostic performance of a low COVID-19 risk threshold (less than 4 points on the diagnostic score) and high-risk threshold (greater than 9 points). Low-risk threshold diagnostic accuracy is for identifying patients without COVID-19, whereas high-risk threshold is for identifying patients with COVID-19

| COVID status based on diagnostic risk score (proportion of patients expected during 'peak') | Management                                                                                                                                                                                                                                                                                                              |
|---------------------------------------------------------------------------------------------|-------------------------------------------------------------------------------------------------------------------------------------------------------------------------------------------------------------------------------------------------------------------------------------------------------------------------|
| Low risk, COVID-19 diagnostic risk score <4                                                 | <ul style="list-style-type: none"> <li>• Alternative diagnosis most likely</li> <li>• Rapid RT-PCR or antigen test, if negative send to 'COVID-negative' area</li> </ul>                                                                                                                                                |
| Medium risk, COVID-19 diagnostic score 4-9                                                  | <ul style="list-style-type: none"> <li>• Uncertain if COVID-19 is cause for presentation</li> <li>• Will need further testing to determine COVID-19 diagnosis</li> <li>• Either test with Rapid RT-PCR or antigen test, or consider CT imaging, or standard COVID-19 RT-PCR testing and move to isolation in</li> </ul> |
| High risk, COVID-19 diagnostic score >9                                                     | <ul style="list-style-type: none"> <li>• COVID-19 most likely</li> <li>• Isolate patient in COVID-19 area or isolation room and standard COVID-19 RT-PCR testing</li> </ul>                                                                                                                                             |

**Supplementary Table 5.** Potential application of COVID-19 diagnostic risk score

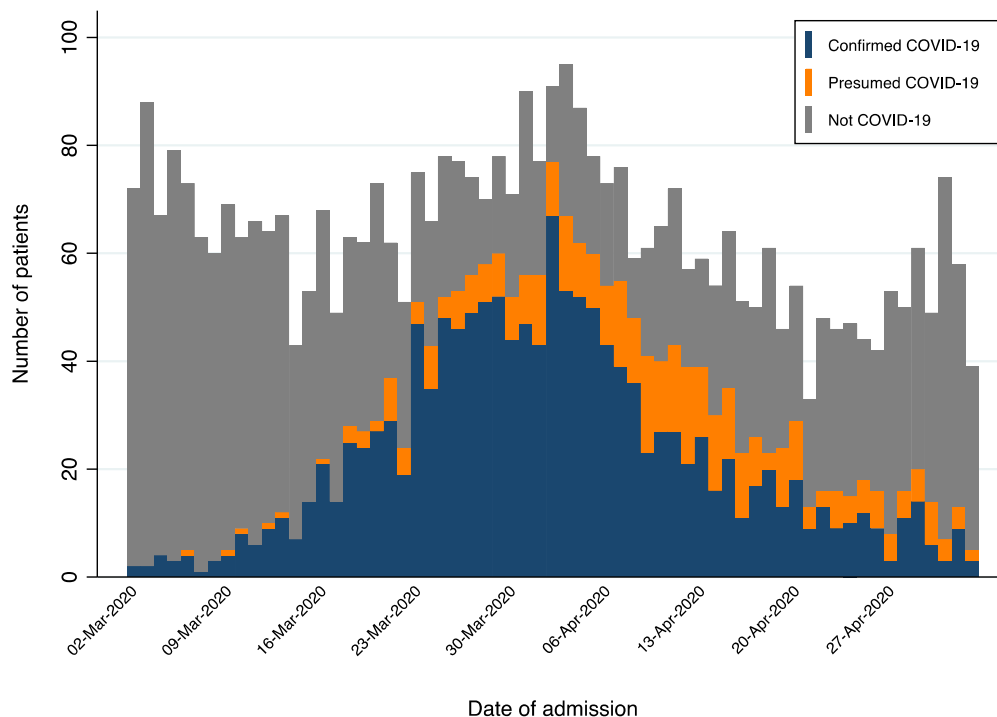

**Supplementary Figure 1.** Number of patients admitted and final diagnosis by date of admission. Confirmed COVID-19 is patients with a positive SARS-CoV-2 PCR from nasopharyngeal swab, presumed COVID-19 is patients without a positive SARS-CoV-2 PCR but a discharge diagnosis of COVID-19. Not COVID-19 are patients without a positive SARS-CoV-2 PCR and an alternative diagnosis. N=4008.

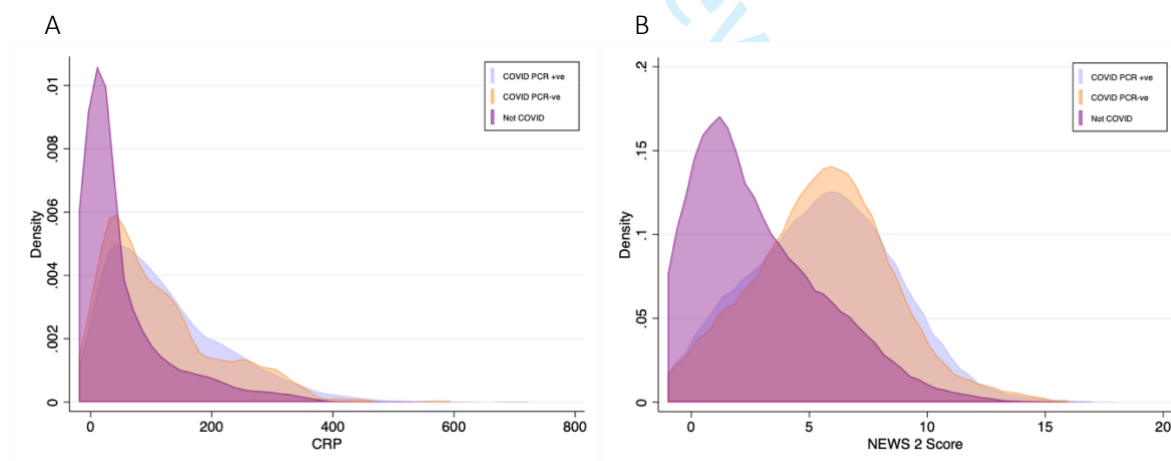

**Supplementary Figure 2.** Distribution of (A) C-reactive protein (N=3518) and (B) National Early Warning Score (NEWS) (N=3889) by diagnosis at the time of hospital admission.

**False-negative RT-PCR for COVID-19 and diagnostic risk score: a retrospective cohort study among patients admitted to hospital**  
**STROBE 2007 (v4) Statement—Checklist of items that should be included in reports of *cohort studies***

| Section/Topic                | Item # | Recommendation                                                                                                                                                                       | Reported on page # |
|------------------------------|--------|--------------------------------------------------------------------------------------------------------------------------------------------------------------------------------------|--------------------|
| <b>Title and abstract</b>    | 1      | (a) Indicate the study's design with a commonly used term in the title or the abstract                                                                                               | 1                  |
|                              |        | (b) Provide in the abstract an informative and balanced summary of what was done and what was found                                                                                  | 2                  |
| <b>Introduction</b>          |        |                                                                                                                                                                                      |                    |
| Background/rationale         | 2      | Explain the scientific background and rationale for the investigation being reported                                                                                                 | 3                  |
| Objectives                   | 3      | State specific objectives, including any prespecified hypotheses                                                                                                                     | 3                  |
| <b>Methods</b>               |        |                                                                                                                                                                                      |                    |
| Study design                 | 4      | Present key elements of study design early in the paper                                                                                                                              | 4                  |
| Setting                      | 5      | Describe the setting, locations, and relevant dates, including periods of recruitment, exposure, follow-up, and data collection                                                      | 4                  |
| Participants                 | 6      | (a) Give the eligibility criteria, and the sources and methods of selection of participants. Describe methods of follow-up                                                           | 4-5                |
|                              |        | (b) For matched studies, give matching criteria and number of exposed and unexposed                                                                                                  | NA                 |
| Variables                    | 7      | Clearly define all outcomes, exposures, predictors, potential confounders, and effect modifiers. Give diagnostic criteria, if applicable                                             | 5                  |
| Data sources/<br>measurement | 8*     | For each variable of interest, give sources of data and details of methods of assessment (measurement). Describe comparability of assessment methods if there is more than one group | 4-5                |
| Bias                         | 9      | Describe any efforts to address potential sources of bias                                                                                                                            | 5-6                |
| Study size                   | 10     | Explain how the study size was arrived at                                                                                                                                            | 5                  |
| Quantitative variables       | 11     | Explain how quantitative variables were handled in the analyses. If applicable, describe which groupings were chosen and why                                                         | 5-6                |
| Statistical methods          | 12     | (a) Describe all statistical methods, including those used to control for confounding                                                                                                | 5-6                |
|                              |        | (b) Describe any methods used to examine subgroups and interactions                                                                                                                  | 6                  |
|                              |        | (c) Explain how missing data were addressed                                                                                                                                          | 6                  |
|                              |        | (d) If applicable, explain how loss to follow-up was addressed                                                                                                                       | NA                 |
|                              |        | (e) Describe any sensitivity analyses                                                                                                                                                | 5-6                |



|                          |     |                                                                                                                                                                                                              |                 |
|--------------------------|-----|--------------------------------------------------------------------------------------------------------------------------------------------------------------------------------------------------------------|-----------------|
| <b>Results</b>           |     |                                                                                                                                                                                                              |                 |
| Participants             | 13* | (a) Report numbers of individuals at each stage of study—eg numbers potentially eligible, examined for eligibility, confirmed eligible, included in the study, completing follow-up, and analysed            | Figure 1/page 7 |
|                          |     | (b) Give reasons for non-participation at each stage                                                                                                                                                         | NA              |
|                          |     | (c) Consider use of a flow diagram                                                                                                                                                                           | Figure 1        |
| Descriptive data         | 14* | (a) Give characteristics of study participants (eg demographic, clinical, social) and information on exposures and potential confounders                                                                     | Table 1, page 7 |
|                          |     | (b) Indicate number of participants with missing data for each variable of interest                                                                                                                          | Table 1         |
|                          |     | (c) Summarise follow-up time (eg, average and total amount)                                                                                                                                                  | 7               |
| Outcome data             | 15* | Report numbers of outcome events or summary measures over time                                                                                                                                               | 7, figure S2    |
| Main results             | 16  | (a) Give unadjusted estimates and, if applicable, confounder-adjusted estimates and their precision (eg, 95% confidence interval). Make clear which confounders were adjusted for and why they were included | 7-8             |
|                          |     | (b) Report category boundaries when continuous variables were categorized                                                                                                                                    | 7-8             |
|                          |     | (c) If relevant, consider translating estimates of relative risk into absolute risk for a meaningful time period                                                                                             | NA              |
| Other analyses           | 17  | Report other analyses done—eg analyses of subgroups and interactions, and sensitivity analyses                                                                                                               | 7-8             |
| <b>Discussion</b>        |     |                                                                                                                                                                                                              |                 |
| Key results              | 18  | Summarise key results with reference to study objectives                                                                                                                                                     | 10              |
| <b>Limitations</b>       |     |                                                                                                                                                                                                              |                 |
| Interpretation           | 20  | Give a cautious overall interpretation of results considering objectives, limitations, multiplicity of analyses, results from similar studies, and other relevant evidence                                   | 10-11           |
| Generalisability         | 21  | Discuss the generalisability (external validity) of the study results                                                                                                                                        | 11              |
| <b>Other information</b> |     |                                                                                                                                                                                                              |                 |
| Funding                  | 22  | Give the source of funding and the role of the funders for the present study and, if applicable, for the original study on which the present article is based                                                | 12              |

\*Give information separately for cases and controls in case-control studies and, if applicable, for exposed and unexposed groups in cohort and cross-sectional studies.

**Note:** An Explanation and Elaboration article discusses each checklist item and gives methodological background and published examples of transparent reporting. The STROBE checklist is best used in conjunction with this article (freely available on the Web sites of PLoS Medicine at <http://www.plosmedicine.org/>, Annals of Internal Medicine at <http://www.annals.org/>, and Epidemiology at <http://www.epidem.com/>). Information on the STROBE Initiative is available at [www.strobe-statement.org](http://www.strobe-statement.org).

False-negative RT-PCR for COVID-19 and diagnostic risk score: a retrospective cohort study among patients admitted to hospital

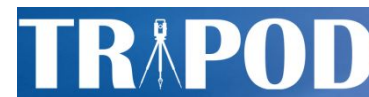

TRIPOD Checklist: Prediction Model Development and Validation

| Section/Topic                | Item | Checklist Item | Page                                                                                                                                                                                                                               |                  |
|------------------------------|------|----------------|------------------------------------------------------------------------------------------------------------------------------------------------------------------------------------------------------------------------------------|------------------|
| <b>Title and abstract</b>    |      |                |                                                                                                                                                                                                                                    |                  |
| Title                        | 1    | D;V            | Identify the study as developing and/or validating a multivariable prediction model, the target population, and the outcome to be predicted.                                                                                       | 1                |
| Abstract                     | 2    | D;V            | Provide a summary of objectives, study design, setting, participants, sample size, predictors, outcome, statistical analysis, results, and conclusions.                                                                            | 2                |
| <b>Introduction</b>          |      |                |                                                                                                                                                                                                                                    |                  |
| Background and objectives    | 3a   | D;V            | Explain the medical context (including whether diagnostic or prognostic) and rationale for developing or validating the multivariable prediction model, including references to existing models.                                   | 3                |
|                              | 3b   | D;V            | Specify the objectives, including whether the study describes the development or validation of the model or both.                                                                                                                  | 3                |
| <b>Methods</b>               |      |                |                                                                                                                                                                                                                                    |                  |
| Source of data               | 4a   | D;V            | Describe the study design or source of data (e.g., randomized trial, cohort, or registry data), separately for the development and validation data sets, if applicable.                                                            | 4                |
|                              | 4b   | D;V            | Specify the key study dates, including start of accrual; end of accrual; and, if applicable, end of follow-up.                                                                                                                     | 4                |
| Participants                 | 5a   | D;V            | Specify key elements of the study setting (e.g., primary care, secondary care, general population) including number and location of centres.                                                                                       | 4                |
|                              | 5b   | D;V            | Describe eligibility criteria for participants.                                                                                                                                                                                    | 4                |
|                              | 5c   | D;V            | Give details of treatments received, if relevant.                                                                                                                                                                                  | NA               |
| Outcome                      | 6a   | D;V            | Clearly define the outcome that is predicted by the prediction model, including how and when assessed.                                                                                                                             | 6                |
|                              | 6b   | D;V            | Report any actions to blind assessment of the outcome to be predicted.                                                                                                                                                             | NA               |
| Predictors                   | 7a   | D;V            | Clearly define all predictors used in developing or validating the multivariable prediction model, including how and when they were measured.                                                                                      | 6                |
|                              | 7b   | D;V            | Report any actions to blind assessment of predictors for the outcome and other predictors.                                                                                                                                         | NA               |
| Sample size                  | 8    | D;V            | Explain how the study size was arrived at.                                                                                                                                                                                         | 6                |
| Missing data                 | 9    | D;V            | Describe how missing data were handled (e.g., complete-case analysis, single imputation, multiple imputation) with details of any imputation method.                                                                               | 6-7              |
| Statistical analysis methods | 10a  | D              | Describe how predictors were handled in the analyses.                                                                                                                                                                              | 6                |
|                              | 10b  | D              | Specify type of model, all model-building procedures (including any predictor selection), and method for internal validation.                                                                                                      | 6                |
|                              | 10c  | V              | For validation, describe how the predictions were calculated.                                                                                                                                                                      | 6-7              |
|                              | 10d  | D;V            | Specify all measures used to assess model performance and, if relevant, to compare multiple models.                                                                                                                                | 6                |
|                              | 10e  | V              | Describe any model updating (e.g., recalibration) arising from the validation, if done.                                                                                                                                            | NA               |
| Risk groups                  | 11   | D;V            | Provide details on how risk groups were created, if done.                                                                                                                                                                          | 6-7              |
| Development vs. validation   | 12   | V              | For validation, identify any differences from the development data in setting, eligibility criteria, outcome, and predictors.                                                                                                      | NA               |
| <b>Results</b>               |      |                |                                                                                                                                                                                                                                    |                  |
| Participants                 | 13a  | D;V            | Describe the flow of participants through the study, including the number of participants with and without the outcome and, if applicable, a summary of the follow-up time. A diagram may be helpful.                              | Figure 1, page 7 |
|                              | 13b  | D;V            | Describe the characteristics of the participants (basic demographics, clinical features, available predictors), including the number of participants with missing data for predictors and outcome.                                 | Table 1          |
|                              | 13c  | V              | For validation, show a comparison with the development data of the distribution of important variables (demographics, predictors and outcome).                                                                                     | NA               |
| Model development            | 14a  | D              | Specify the number of participants and outcome events in each analysis.                                                                                                                                                            | 7                |
|                              | 14b  | D              | If done, report the unadjusted association between each candidate predictor and outcome.                                                                                                                                           | Table 2          |
| Model specification          | 15a  | D              | Present the full prediction model to allow predictions for individuals (i.e., all regression coefficients, and model intercept or baseline survival at a given time point).                                                        | Table 3          |
|                              | 15b  | D              | Explain how to use the prediction model.                                                                                                                                                                                           | 9                |
| Model performance            | 16   | D;V            | Report performance measures (with CIs) for the prediction model.                                                                                                                                                                   | 9, supplement    |
| Model-updating               | 17   | V              | If done, report the results from any model updating (i.e., model specification, model performance).                                                                                                                                | NA               |
| <b>Discussion</b>            |      |                |                                                                                                                                                                                                                                    |                  |
| Limitations                  | 18   | D;V            | Discuss any limitations of the study (such as nonrepresentative sample, few events per predictor, missing data).                                                                                                                   | 10-11            |
| Interpretation               | 19a  | V              | For validation, discuss the results with reference to performance in the development data, and any other validation data.                                                                                                          | 10-11            |
|                              | 19b  | D;V            | Give an overall interpretation of the results, considering objectives, limitations, results from similar studies, and other relevant evidence.                                                                                     | 10-11            |
| Implications                 | 20   | D;V            | Discuss the potential clinical use of the model and implications for future research.                                                                                                                                              | 10-11, table S5  |
| <b>Other information</b>     |      |                |                                                                                                                                                                                                                                    |                  |
| Supplementary information    | 21   | D;V            | Provide information about the availability of supplementary resources, such as study protocol, Web calculator, and data sets. <a href="http://www.bmj.com/site/about/guidelines.xhtml">www.bmj.com/site/about/guidelines.xhtml</a> | Supplement       |

1 False-negative RT-PCR for COVID-19 and diagnostic risk score: a  
 2 retrospective cohort study among patients admitted to hospital

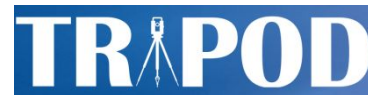

3 TRIPOD Checklist: Prediction Model Development and Validation  
 4

5

|         |    |     |                                                                               |                     |
|---------|----|-----|-------------------------------------------------------------------------------|---------------------|
|         |    |     |                                                                               | ary<br>appen<br>dix |
| Funding | 22 | D;V | Give the source of funding and the role of the funders for the present study. | 12                  |

6  
7  
8  
9

10 \*Items relevant only to the development of a prediction model are denoted by D, items relating solely to a validation of a prediction model are  
 11 denoted by V, and items relating to both are denoted D;V. We recommend using the TRIPOD Checklist in conjunction with the TRIPOD  
 12 Explanation and Elaboration document.  
 13  
 14  
 15  
 16  
 17  
 18  
 19  
 20  
 21  
 22  
 23  
 24  
 25  
 26  
 27  
 28  
 29  
 30  
 31  
 32  
 33  
 34  
 35  
 36  
 37  
 38  
 39  
 40  
 41  
 42  
 43  
 44  
 45  
 46  
 47  
 48  
 49  
 50  
 51  
 52  
 53  
 54  
 55  
 56  
 57  
 58  
 59  
 60

For peer review only

# BMJ Open

## False-negative RT-PCR for COVID-19 and a diagnostic risk score: a retrospective cohort study among patients admitted to hospital

|                                 |                                                                                                                                                                                                                                                                                                                                                                                                                                                                                                                                                                                                                                                                                                                                                                                                                                                                                                                                                                                                                                                                                                                                                                                                                                                                                                                                                                                                                                                                                                                              |
|---------------------------------|------------------------------------------------------------------------------------------------------------------------------------------------------------------------------------------------------------------------------------------------------------------------------------------------------------------------------------------------------------------------------------------------------------------------------------------------------------------------------------------------------------------------------------------------------------------------------------------------------------------------------------------------------------------------------------------------------------------------------------------------------------------------------------------------------------------------------------------------------------------------------------------------------------------------------------------------------------------------------------------------------------------------------------------------------------------------------------------------------------------------------------------------------------------------------------------------------------------------------------------------------------------------------------------------------------------------------------------------------------------------------------------------------------------------------------------------------------------------------------------------------------------------------|
| Journal:                        | <i>BMJ Open</i>                                                                                                                                                                                                                                                                                                                                                                                                                                                                                                                                                                                                                                                                                                                                                                                                                                                                                                                                                                                                                                                                                                                                                                                                                                                                                                                                                                                                                                                                                                              |
| Manuscript ID                   | bmjopen-2020-047110.R1                                                                                                                                                                                                                                                                                                                                                                                                                                                                                                                                                                                                                                                                                                                                                                                                                                                                                                                                                                                                                                                                                                                                                                                                                                                                                                                                                                                                                                                                                                       |
| Article Type:                   | Original research                                                                                                                                                                                                                                                                                                                                                                                                                                                                                                                                                                                                                                                                                                                                                                                                                                                                                                                                                                                                                                                                                                                                                                                                                                                                                                                                                                                                                                                                                                            |
| Date Submitted by the Author:   | 06-Jan-2021                                                                                                                                                                                                                                                                                                                                                                                                                                                                                                                                                                                                                                                                                                                                                                                                                                                                                                                                                                                                                                                                                                                                                                                                                                                                                                                                                                                                                                                                                                                  |
| Complete List of Authors:       | Gupta-Wright, Ankur; University College London, Institute for Global Health; London School of Hygiene and Tropical Medicine Faculty of Infectious and Tropical Diseases, Clinical Research Department<br>Macleod , Colin ; London North West University Healthcare NHS Trust; London School of Hygiene and Tropical Medicine Faculty of Infectious and Tropical Diseases, Clinical Research Department<br>Barrett, Jessica; London North West University Healthcare NHS Trust<br>Filson, Sarah; London North West University Healthcare NHS Trust<br>Corrah, Tumena; London North West University Healthcare NHS Trust<br>Parris, Victoria; London North West University Healthcare NHS Trust<br>Sandhu, Gurjinder; London North West University Healthcare NHS Trust<br>Harris, Miriam; London North West Healthcare NHS Trust, Microbiology<br>Tennant, Rachel; London North West University Healthcare NHS Trust<br>Vaid, Nidhi; London North West University Healthcare NHS Trust<br>Takata, Junko; London North West University Healthcare NHS Trust<br>Duraisingham, Sai; London North West University Healthcare NHS Trust<br>Gandy, Nemi; London North West University Healthcare NHS Trust<br>Chana, Harmeet; London North West University Healthcare NHS Trust<br>Whittington, Ashley; London North West University Healthcare NHS Trust<br>McGregor , Alastair; London North West University Healthcare NHS Trust<br>Papineni, Padmasayee; London North West University Healthcare NHS Trust, Infectious Diseases |
| <b>Primary Subject Heading</b>: | Infectious diseases                                                                                                                                                                                                                                                                                                                                                                                                                                                                                                                                                                                                                                                                                                                                                                                                                                                                                                                                                                                                                                                                                                                                                                                                                                                                                                                                                                                                                                                                                                          |
| Secondary Subject Heading:      | Diagnostics                                                                                                                                                                                                                                                                                                                                                                                                                                                                                                                                                                                                                                                                                                                                                                                                                                                                                                                                                                                                                                                                                                                                                                                                                                                                                                                                                                                                                                                                                                                  |
| Keywords:                       | COVID-19, Molecular diagnostics < INFECTIOUS DISEASES, Epidemiology < INFECTIOUS DISEASES                                                                                                                                                                                                                                                                                                                                                                                                                                                                                                                                                                                                                                                                                                                                                                                                                                                                                                                                                                                                                                                                                                                                                                                                                                                                                                                                                                                                                                    |
|                                 |                                                                                                                                                                                                                                                                                                                                                                                                                                                                                                                                                                                                                                                                                                                                                                                                                                                                                                                                                                                                                                                                                                                                                                                                                                                                                                                                                                                                                                                                                                                              |

SCHOLARONE™  
Manuscripts



I, the Submitting Author has the right to grant and does grant on behalf of all authors of the Work (as defined in the below author licence), an exclusive licence and/or a non-exclusive licence for contributions from authors who are: i) UK Crown employees; ii) where BMJ has agreed a CC-BY licence shall apply, and/or iii) in accordance with the terms applicable for US Federal Government officers or employees acting as part of their official duties; on a worldwide, perpetual, irrevocable, royalty-free basis to BMJ Publishing Group Ltd ("BMJ") its licensees and where the relevant Journal is co-owned by BMJ to the co-owners of the Journal, to publish the Work in this journal and any other BMJ products and to exploit all rights, as set out in our [licence](#).

The Submitting Author accepts and understands that any supply made under these terms is made by BMJ to the Submitting Author unless you are acting as an employee on behalf of your employer or a postgraduate student of an affiliated institution which is paying any applicable article publishing charge ("APC") for Open Access articles. Where the Submitting Author wishes to make the Work available on an Open Access basis (and intends to pay the relevant APC), the terms of reuse of such Open Access shall be governed by a Creative Commons licence – details of these licences and which [Creative Commons](#) licence will apply to this Work are set out in our licence referred to above.

Other than as permitted in any relevant BMJ Author's Self Archiving Policies, I confirm this Work has not been accepted for publication elsewhere, is not being considered for publication elsewhere and does not duplicate material already published. I confirm all authors consent to publication of this Work and authorise the granting of this licence.

1  
2  
3 **BMJ Open: Original Research Article**  
4  
5  
6  
7

8 **Title:**  
9

10 False-negative RT-PCR for COVID-19 and a diagnostic risk score: a retrospective cohort study  
11  
12 among patients admitted to hospital  
13  
14  
15  
16

17  
18 **Authors:**  
19

20 Ankur Gupta-Wright (1,2,3)\*, Colin Kenneth Macleod (2,3)\*, Jessica Barrett (3), Sarah Ann  
21  
22 Filson (3), Tumena Corrah (3), Victoria Parris (3), Gurjinder Sandhu (3), Miriam Harris (3),  
23  
24 Rachel Tennant (3), Nidhi Vaid (3), Junko Takata (3), Sai Duraisingham (3), Nemi Gandy (3),  
25  
26 Harmeet Chana (3), Ashley Whittington (3), Alastair McGregor (3), Padmasayee Papineni (3)  
27  
28

29 \*Contributed equally  
30  
31  
32  
33  
34

35 **Author affiliations**  
36

- 37 1. Institute for Global Health, University College London, London UK  
38  
39 2. Clinical Research Department, London School of Hygiene & Tropical Medicine, London UK  
40  
41 3. London North West University Healthcare NHS Trust, London, United Kingdom  
42  
43  
44  
45

46 **Corresponding author:**  
47

48 Ankur Gupta-Wright  
49

50  
51 Institute for Global Health

52  
53 University College London

54  
55 Mortimer Market, off Caper Street

56  
57  
58 London WC1E 6JB  
59  
60

1  
2  
3 [ankurgw@outlook.com](mailto:ankurgw@outlook.com)  
4

5  
6 +44 (0) 7764607560  
7  
8  
9

10 Word Count: 3,832 (abstract 266)  
11  
12  
13  
14

15 Keywords: COVID-19, diagnosis, risk score, hospital  
16  
17  
18  
19  
20  
21  
22  
23  
24  
25  
26  
27  
28  
29  
30  
31  
32  
33  
34  
35  
36  
37  
38  
39  
40  
41  
42  
43  
44  
45  
46  
47  
48  
49  
50  
51  
52  
53  
54  
55  
56  
57  
58  
59  
60

For peer review only

## **ABSTRACT**

Objective: To describe the characteristics and outcomes of patients with a clinical diagnosis of COVID-19 and false negative SARS-CoV-2 RT-PCR, and develop and internally validate a diagnostic risk score to predict risk of COVID-19 (including RT-PCR negative COVID-19) amongst medical admissions

Design: Retrospective cohort study

Setting: Two hospitals within an acute NHS trust in London, UK

Participants: All patients admitted to medical wards between 2<sup>nd</sup> March and 3<sup>rd</sup> May 2020.

Outcomes: Main outcomes were diagnosis of COVID-19, SARS-CoV-2 RT-PCR results, sensitivity of SARS-CoV-2 RT-PCR and mortality during hospital admission. For the diagnostic risk score, we report discrimination, calibration and diagnostic accuracy of the model and simplified risk score, and internal validation.

Results: 4008 patients were admitted between 2<sup>nd</sup> March and 3<sup>rd</sup> May 2020. 1792 patients (44.8%) were diagnosed with COVID-19, of whom 1391 were SARS-CoV-2 RT-PCR positive, and 283 had only negative RT-PCRs. Compared to a clinical reference standard, sensitivity of RT-PCR in hospital patients was 83.1% (95% CI 81.2-84.8%). Broadly, patients with false-negative RT-PCR COVID-19 and those confirmed by positive PCR had similar demographic and clinical characteristics, but lower risk of ICU admission and lower in-hospital mortality (adjusted odds ratio 0.41, 95% CI 0.27-0.61). A simple diagnostic risk score comprising of age,



1  
2  
3 sex, ethnicity, cough, fever or shortness of breath, National Early Warning Score (NEWS2), C-  
4  
5  
6 Reactive Protein, and chest radiograph appearance had moderate discrimination (area under  
7  
8 the receiver-operator-curve 0.83, 95% CI 0.82-0.85), good calibration and was internally  
9  
10 validated.  
11  
12  
13  
14

15 Conclusion: RT-PCR negative COVID-19 is common and is associated with lower mortality  
16  
17 despite similar presentation. Diagnostic risk scores could potentially help triage patients  
18  
19 requiring admission, but need external validation.  
20  
21  
22  
23  
24  
25  
26  
27  
28  
29  
30  
31  
32  
33  
34  
35  
36  
37  
38  
39  
40  
41  
42  
43  
44  
45  
46  
47  
48  
49  
50  
51  
52  
53  
54  
55  
56  
57  
58  
59  
60

### STRENGTHS AND LIMITATIONS OF THIS STUDY

- Large cohort of consecutive acute medical admissions in two hospitals covering a diverse population in London, UK, during first COVID-19 'peak'
- Assessment of 'real world' performance of SARS CoV-2 RT-PCR from nasopharyngeal swabs for diagnosis of COVID-19
- Inherent limitations of retrospective cohort study design, including some missing data
- Not all patients had SARS-CoV-2 RT-PCR testing

## INTRODUCTION

The coronavirus disease 2019 (COVID-19) global pandemic, caused by infection with the severe acute respiratory syndrome coronavirus 2 (SARS-CoV-2), has led to unprecedented numbers of unwell and infectious patients requiring admission to hospital. The symptoms of COVID-19 can be non-specific, so diagnostic confirmation in hospital is often sought by detection of SARS-CoV-2 ribonucleic acid (RNA) sequences by reverse transcription-polymerase chain reaction (RT-PCR) from a clinical specimen.

Since the beginning of the pandemic, the standard sample for PCR testing has been a nasopharyngeal swab (NPS) or aspirate, but there are concerns that a significant proportion of cases test negative on initial RT-PCR of an NPS sample, with many patients having repeated sampling to confirm the diagnosis.<sup>1</sup> A systematic review of real-world diagnostic sensitivity of SARS-CoV-2 RT-PCR reports that up to 33% of patients with COVID-19 may have an initial false negative NPS result despite a compatible clinical illness, consistent thoracic imaging and/or subsequent positive antibodies to COVID-19.<sup>2-5</sup> False negative RT-PCR may result from inadequate nasopharyngeal sampling technique, delayed time to analysis, ineffective sample storage, variable gene targets in RT-PCR assays leading to imperfect analytic sensitivity, or if a patient is tested at a point when viral throat carriage is absent or below the detectable threshold (either too early or too late).<sup>6,7</sup> This high false negative rate complicates both hospital infection control and clinical decision making. Being able to identify patients with a high probability of COVID-19 despite a negative RT-PCR is crucial for effective clinical care.

The clinical characteristics and outcomes of hospitalised patients with COVID-19 have been well described globally, but these studies are limited to patients with RT-PCR confirmed

1  
2  
3  
4 25 COVID-19.<sup>8-10</sup> The pattern of disease and outcomes of patients with false negative COVID-19  
5  
6 26 tests has not been well reported to date, nor has the diagnostic accuracy of RT-PCR assays in  
7  
8 27 secondary care settings in the United Kingdom (UK). Several studies have derived and  
9  
10 28 validated risk scores to assess severity and prognosis amongst patients with COVID-19.  
11  
12  
13 29 However few risk scores focus on identifying patients with COVID-19 amongst those needing  
14  
15 30 hospital admission and those that do are from outside the UK, do not consider all hospital  
16  
17 31 admissions, rely on high-resolution computerised tomography (CT) scanning of the lungs, and  
18  
19 32 exclude patients without RT-PCR-confirmed disease.<sup>11</sup>  
20  
21  
22  
23 33

24  
25 34 We therefore aim to describe the characteristics and outcomes of patients with a clinical  
26  
27 35 diagnosis of COVID-19 but with negative RT-PCR from NPS, and the real-world sensitivity of  
28  
29 36 RT-PCR for COVID-19. Secondly, we describe predictors of COVID-19 amongst general  
30  
31 37 medical admissions, including assessing whether a simple diagnostic risk score could be  
32  
33 38 derived, internally validated, and used to predict which patients admitted to medical wards will  
34  
35 39 have COVID-19.  
36  
37  
38

## 39 40 **METHODS**

### 41 42 **Study design**

43  
44 42 This is a retrospective observational cohort study of consecutive admissions in London North  
45  
46 43 West University Healthcare NHS Trust, comprising two hospitals, Northwick Park and Ealing.  
47  
48 44 Patients were included in this study if they were admitted via the acute medical team between  
49  
50 45 2<sup>nd</sup> March and 3<sup>rd</sup> May 2020 inclusive.  
51  
52  
53  
54 46

### 56 47 **Data collection**

57  
58  
59  
60

1  
2  
3 48 Cases were identified retrospectively through electronic medical admission lists. De-identified  
4  
5  
6 49 data on patient demographics, co-morbidities, clinical characteristics, vital signs, routine  
7  
8 50 biochemical, haematological and microbiological tests, diagnosis and clinical outcomes were  
9  
10 51 extracted from routinely collected clinical data using electronic patient record systems, and  
11  
12  
13 52 other NHS Trust health information systems. Physiological observations were those first  
14  
15 53 recorded on admission to the emergency department. All biochemical and haematological data  
16  
17 54 were from the first samples taken within 48 hours of admission. Thoracic imaging (chest  
18  
19 55 radiographs and CT) were reported by consultant radiologists and coded based upon COVID-  
20  
21 56 19 guidelines from the British Society of Thoracic Imaging (BSTI).<sup>12</sup>  
22  
23  
24

25 57  
26  
27 58 RT-PCR of a clinical specimen from NPS was the only SARS-CoV-2 testing available during  
28  
29 59 the study period. The decision to test was based on a clinical suspicion of COVID-19. Testing  
30  
31 60 was performed at the point of admission or as soon as possible afterwards. Due to high  
32  
33 61 demand and limited capacity, some patients with high clinical suspicion did not undergo SARS-  
34  
35 62 CoV-2 testing. Routine testing for all admissions was introduced after the study period. Most  
36  
37 63 SARS-CoV-2 testing was done using Panther Fusion™ (Hologic; ORF1ab Region 1 / 2 target)  
38  
39 64 or Abbott RealTime™ (RNA-dependent RNA polymerase, Nucleocapsid target) assays on  
40  
41 65 NPS.  
42  
43  
44  
45  
46  
47  
48

49 67 Approval for this study was provided by London North West University Healthcare NHS Trust  
50  
51 68 research and governance department, and the NHS Health Regulatory Authority (IRAS ID  
52  
53 69 285815). Written informed consent from participants was not obtained in compliance with  
54  
55 70 Secretary of State for Health and Social Care 'Notice' under Regulation 3(4) of the Health  
56  
57 71 Service Control of Patient Information Regulations 20021 (COPI) requiring health providers to  
58  
59  
60

1  
2  
3  
4 72 process confidential patient and Control of Patient Information Regulations due to the COVID-  
5  
6 73 19 pandemic.  
7

8 74  
9

## 10 75 **Definitions**

11  
12  
13 76 Patients were assigned as having RT-PCR confirmed COVID-19 if they had a positive SARS-  
14  
15 77 CoV-2 RT-PCR within 7 days before or after the date of admission, and had a discharge  
16  
17  
18 78 diagnosis of COVID-19 recorded by the clinical team. False-negative RT-PCR COVID-19 was  
19  
20 79 defined as patients with a discharge diagnosis of COVID-19 made by the clinical team and one  
21  
22 80 or more negative SARS-CoV-2 RT-PCR within 48 hours of admission in the absence of any  
23  
24  
25 81 positive SARS-CoV-2 RT-PCR results. Patients with evidence of alternative diagnoses (i.e. not  
26  
27 82 COVID-19) made by the clinical team and no positive SARS-CoV-2 RT-PCR results were  
28  
29  
30 83 defined as not having COVID-19. Medical records for patients with positive SARS-CoV-2 tests  
31  
32 84 greater than 7 days after admission but before discharge, and a diagnosis of COVID-19 were  
33  
34  
35 85 reviewed as to whether the admission was likely to represent a missing or delayed SARS-CoV-  
36  
37 86 2 RT-PCR result (i.e. patients with community-acquired COVID-19) or nosocomial COVID-19  
38  
39 87 transmission. Mortality was assessed at discharge from hospital.  
40

41 88  
42  
43

## 44 89 **Statistical methods**

45  
46 90 Basic descriptive statistics were performed, with continuous data presented as median  
47  
48  
49 91 (interquartile range) and categorical data as frequency (%). Comparisons were made using chi-  
50  
51 92 squared tests for proportions, t-tests for means and Wilcoxon rank sum for medians. Logistic  
52  
53  
54 93 regression was used to assess associations between variables and diagnosis of COVID-19. In  
55  
56 94 exploratory analyses to assess association between RT-PCR negative COVID-19 and  
57  
58  
59  
60

1  
2  
3 95 mortality, a multivariable logistic regression model was used adjusting for other variable  
4  
5  
6 96 associated with poor outcomes in COVID-19.<sup>13</sup>  
7

8 97  
9

### 10 98 **Sensitivity and false-negative RT-PCR**

11  
12  
13 99 The real-world sensitivity of SARS-CoV-2 RT-PCR from NPS against a reference standard of a  
14  
15 100 clinical diagnosis of COVID-19 was estimated as the proportion of patients positive from any  
16  
17  
18 101 RT-PCR, excluding those without any valid RT-PCR results. Sensitivity was also calculated by  
19  
20 102 restricting analyses to patients with two or more RT-PCR results from NPS taken in a 24- and  
21  
22  
23 103 48-hour period. The reference standard was patients with at least one positive RT-PCR in the  
24  
25 104 time period. Incremental yield of a second RT-PCR following an initial negative result in  
26  
27 105 patients was also calculated. Specificity of SARS-CoV-2 RT-PCR was assumed to be 100%.  
28  
29

30 106  
31

### 32 107 **Diagnostic Risk Score**

33  
34 108 In development of a score to predict COVID-19 among medical admissions, candidate predictor  
35  
36  
37 109 variables were selected based on *a priori* knowledge, published literature, clinical reasoning  
38  
39 110 and the need for variables to be objective, reproducible, available in the emergency department  
40  
41  
42 111 soon after presentation. We considered demographic characteristics (age, sex, ethnicity),  
43  
44 112 clinical symptoms associated with COVID-19 (cough, fever or shortness of breath), vital signs  
45  
46 113 (including National Early Warning [NEWS] Score 2), and laboratory bloods (including C-reactive  
47  
48  
49 114 protein (CRP) and arterial/venous blood gas) at the time of presentation to hospital.  
50

51 115  
52  
53

54 116 Continuous variables were assessed for non-linearity using fractional polynomials, and  
55  
56 117 categorised based on established cut-off values and/or fractional polynomials. Complete case  
57  
58 118 analysis was chosen for derivation and internal validation of the score, given most key variables  
59  
60

1  
2  
3  
4 119 had fewer than 10% missing data. To derive a prediction model, we undertook univariable  
5  
6 120 logistic regression analysis assessing associations between candidate variables and COVID-19  
7  
8 121 diagnosis (including all COVID-19 irrespective of RT-PCT status). We then used a backward  
9  
10  
11 122 elimination approach to create a multivariable predictive model, with stepwise elimination of  
12  
13 123 variables, using likelihood ratio tests and Akaike information criterion to compare models.  
14  
15 124 Interaction in the model were also assessed using likelihood ratio testing.

16  
17  
18 125  
19  
20 126 Points were assigned to each variable by identifying clusters of regression coefficients from the  
21  
22  
23 127 final model, then taking the median of those clustered coefficients and scaling so the lowest  
24  
25 128 point score is at least one, and then rounding to the nearest integer.<sup>14</sup> A COVID-19 diagnostic  
26  
27 129 risk score was then derived by combining the points based on patient characteristics.

28  
29  
30 130 Performance of both the full predictive model and risk score was assessed using the area  
31  
32 131 under the receiver operating characteristic (ROC) curve (AUROC curve, also known as  
33  
34 132 concordance-statistic) for discrimination, and plots of predicted probability of COVID-19 against  
35  
36  
37 133 observed risk of COVID-19 for calibration (calibration plots). Decision curve analysis was also  
38  
39 134 conducted to help weigh benefits of using the model, compared to assuming all or no patients  
40  
41  
42 135 were diagnosed with COVID-19, and comparison with other single variables with strong  
43  
44 136 associations with COVID-19.

45  
46  
47 137  
48  
49 138 Internal model validation was done using the bootstrap procedure, with final model applied to  
50  
51 139 each bootstrap sample (n=200), and an optimism corrected AUROC curve calculated.<sup>15</sup> A  
52  
53  
54 140 prediction model was also generated using bootstrap samples and tested on the original  
55  
56 141 dataset. Cut-off thresholds were defined to identify patients at high- and low-risk of COVID-19  
57  
58  
59 142 after plotting risk score against observed COVID risk such that the high-risk group accounted  
60



1  
2  
3  
4 143 for as many COVID-19 cases as the low-risk as few as possible. Sensitivity, specificity, positive  
5  
6 144 predictive value (PPV) and negative predictive value (NPV) were calculated for each threshold,  
7  
8 145 and NPV and PPV calculated for varying prevalence of COVID-19 amongst medical  
9  
10  
11 146 admissions. Sensitivity analysis used multivariate multiple imputation with chained equations  
12  
13 147 for missing data, assuming they were missing at random. Imputation was done for missing  
14  
15 148 candidate predictor variables using 20 imputations, and model generation and performance  
16  
17  
18 149 repeated. All analyses were done using Stata version 16 (StataCorp 2019). Predictive  
19  
20 150 modelling elements are presented in accordance with TRIPOD guidance.<sup>16</sup>  
21  
22  
23 151

## 25 152 **RESULTS**

### 27 153 **Patient characteristics**

29  
30 154 Between 2<sup>nd</sup> March and 3<sup>rd</sup> May 2020, 4008 patients were admitted (2536 at Northwick Park  
31  
32 155 Hospital, and 1472 at Ealing Hospital), with 1792 (44.7%) diagnosed with COVID-19 (figure 1).  
33  
34  
35 156 There were a median of 65 (IQR 57-76) admissions daily, including median daily admission of  
36  
37 157 47 (IQR 28-56) patients diagnosed with COVID-19 (supplementary figure 1). 1391 (77.6%)  
38  
39 158 COVID-19 diagnoses had at least one positive SARS-CoV-2 RT-PCR. 283 (15.8%) had at  
40  
41  
42 159 least one negative and no positive RT-PCR, and 119 (6.6%) did not have a RT-PCR result.  
43  
44 160  
45  
46  
47 161 There were several differences between patients with and without a COVID-19 diagnosis at  
48  
49 162 discharge (including those with false negative RT-PCR results, table 1 and supplementary table  
50  
51 163 1). Most notably patients with COVID-19 were more likely to be male, be more unwell at  
52  
53  
54 164 admission (NEWS score 6 vs 2 for patients without COVID-19) and more likely to need  
55  
56 165 supplementary oxygen. On chest radiograph, patients with COVID-19 were more likely to have  
57  
58  
59 166 lung infiltrates (79% vs 48%) and less likely to have clear lung fields (7% vs 33%).  
60

167

## Outcomes

Overall 248 (6.2%) of medical admissions were admitted to intensive care unit (ICU) for level 2 or 3 support. Patients with COVID-19 diagnosis were more likely to be admitted to ICU (12.7% compared to 1.0%,  $p<0.0001$ ). Median time to intensive care admission was 1 day (IQR 0-3) from admission. Inpatient mortality was 15.6% overall with substantially higher mortality in patients with COVID-19 diagnosis (26.9% compared to 6.4%). 0.4% [ $n=16$ ] remained admitted at the time of data extraction or were missing mortality status. Inpatient death occurred a median of 5 (IQR 2-10) days after admission for patients with COVID-19, and hospital stay was longer than for those without COVID-19 (median 5 [IQR 3-11] days compared to median 3 [IQR 1-7] days,  $P<0.0001$ ).

## Sensitivity of SARS-CoV-2 RT-PCR

Based on COVID-19 patients with a at least one valid SARS-CoV-2 RT-PCR result ( $n=1674$ ), 16.9% ( $n=283$ ) diagnosed with COVID-19 had at least one false-negative RT-PCR. 217 patients had a single negative result, with 66 having two or more negative results. Median time from admission to negative swab was 0 (IQR 0-1) days. Based on a clinical COVID-19 reference standard, the sensitivity of PCR was 83.1% (95% CI 81.2-84.8%). The diagnostic yield (i.e. including those without SARS-CoV-2 PCR results) of SAR-CoV-2 PCR testing of nasopharyngeal swabs was 77.6% (95% CI 75.6-79.5%). If restricted to patients with chest radiology suggestive of COVID-19, 198/968 patients with COVID-19 were RT-PCR negative, giving a sensitivity of 79.6%.

1  
2  
3  
4 190 A total of 185 patients with COVID-19 had two RT-PCR tests within 24 hours, at least one of  
5  
6 191 which was positive. 35/185 had a false-negative RT-PCR, giving a sensitivity of 81.1% (95% CI  
7  
8 192 74.7-86.5%). 62/254 patients with COVID-19 and two or more RT-PCR tests within 48 hours,  
9  
10  
11 193 giving a sensitivity of 75.6% (95% CI 70.0-80.5%). 557 patients with two RT-PCR tests within  
12  
13 194 24 hours had an initial negative test, of whom 17 had a second test that was positive, giving an  
14  
15 195 incremental yield of 3.1% (95% CI 1.9-4.8%). 36/669 patients with an initial negative RT-PCR  
16  
17  
18 196 had a second test that was positive within 48 hours, giving an incremental yield of 5.4% (95%  
19  
20 197 CI 3.9-7.4%).

21  
22  
23 198

### 24 25 199 **False-negative COVID-19 RT-PCR**

26  
27 200 Of patients with RT-PCR negative COVID-19, 70.0% (198/283) had chest radiography or chest  
28  
29  
30 201 CT suggestive of COVID-19 based on BSTI coding, 80.2% (227/283) had lung infiltrates on  
31  
32 202 chest imaging, and only 6.7% (19/283) had normal lung fields on chest radiography. 88.0%  
33  
34  
35 203 reported cough, fever or shortness of breath at admission. Broadly, patients with false-negative  
36  
37 204 RT-PCR COVID-19 and those confirmed by positive PCR had similar demographic and clinical  
38  
39 205 characteristics. Distribution of NEWS score and CRP were similar to RT-PCR-confirmed  
40  
41  
42 206 COVID-19 patients, and differed from those without COVID-19 diagnosis (supplementary figure  
43  
44 207 2). Notable differences include false-negative RT-PCR COVID-19 patients being more likely to  
45  
46  
47 208 report shortness of breath, slightly longer duration of symptoms (median of 7 [IQR 3-12] days  
48  
49 209 compared to 6 [IQR 3-10] days for PCR-positive patients) (table 1). False negative RT-PCR  
50  
51 210 patients also had higher median lymphocyte and platelet counts.

52  
53  
54 211

55  
56 212 Importantly, outcomes were worse for patients with RT-PCR confirmed COVID-19 compared to  
57  
58  
59 213 those who were had a false-negative RT-PCR, with a higher proportion admitted to ICU (13.8  
60

1  
2  
3  
4 214 [95% CI 12.1-15.7 vs 7.8 [95% CI 5.2-11.5]%, p=0.006), and more patients dying during  
5  
6 215 admission (29.3 [95% CI 27.0-31.8]% vs 16.6 [95% CI 12.7-21.4]%, p<0.0001). When limited  
7  
8 216 to patients with chest radiology suggestive of COVID-19, patients with false-negative RT-PCR  
9  
10 217 disease still had better outcomes than PCR-confirmed COVID-19 (ICU admission 8.4%,  
11  
12 mortality 16.3%, n=227). In exploratory analyses adjusted for age, sex, co-morbidities,  
13 218 admission oxygen saturation and admission urea, OR for mortality was 0.41 (95% CI 0.27-0.61)  
14  
15 219 for RT-PCR negative compared to RT-PCR positive COVID-19 (see table supplementary table  
16  
17  
18 220 2).  
19  
20 221  
21  
22  
23 222

### 24 25 223 **Predictors of COVID-19 and diagnostic model**

26  
27 224 Several demographic and clinical variables were strongly associated with a diagnosis of  
28  
29 COVID-19, both in univariable and multivariable analysis (table 2). Abnormal chest radiography  
30 225 with infiltrates (OR 7.8, 95% CI 6.3-9.6), CRP over 50 (OR 6.0, 95% CI 5.2-6.9) and NEWS 2  
31  
32 226 score 5 or more (OR 5.2, 95% CI 5.0-6.6) had the strongest associations with COVID-19  
33  
34 227 diagnosis.  
35  
36  
37 228  
38  
39 229  
40  
41

42 230 The final multivariable diagnostic model included age (modelled as a binary variable being  
43  
44 231 between 50 and 70 years old), sex, ethnicity, reporting anyone of cough, fever or shortness of  
45  
46 232 breath, NEWS 2, CRP, and chest radiograph appearance (n=2,940 table 3). Discrimination of  
47  
48 the full model was moderate (AUROC curve 0.83, 95% CI 0.82-0.85), with good calibration (see  
49 233 figure 2). A simplified risk score was constructed based on  $\beta$ -coefficients (table 3), with similar  
50  
51 234 calibration and discrimination to the full model (AUROC curve 0.83, 95% CI 0.81 – 0.84).  
52  
53 235 Internal validation using bootstrap samples (n=200) generated an optimism corrected AUC 0.82  
54  
55 236 (95% CI 0.80-0.84, AUC for internal validated model 0.83 [95% CI 0.81 – 0.85]). Decision curve  
56  
57 237  
58  
59  
60

1  
2  
3  
4 238 analysis showed the diagnostic risk score model had better clinical utility across a range of  
5  
6 239 thresholds than treating all or no patients as having COVID-19, using a CRP of >50, or a  
7  
8 240 NEWS score  $\geq 5$  (see figure 2). The model and risk score performed similarly in sensitivity  
9  
10  
11 241 analyses using multiple imputation instead of complete case analysis, and assessing the risk  
12  
13 242 score using the whole patient population (see supplementary table 3).  
14  
15  
16 243  
17  
18 244 The number and proportion of patients with or without COVID-19 diagnosis based on the risk  
19  
20 245 score is shown in figure 3. 446 (15%) of patients had a score of  $< 4$ , of whom 10.9% (49/446)  
21  
22  
23 246 were diagnosed with COVID-19. Using this threshold to identify patients *without* COVID-19 had  
24  
25 247 a 26.6% sensitivity, but 96.6% specificity, with an 89.0% positive predictive value (PPV, table  
26  
27  
28 248 4). 594 (20.2%) patients were above the high-risk threshold, set at a diagnostic risk score  $> 9$ .  
29  
30 249 At high COVID-19 prevalence (50%), this threshold had a good PPV ( $> 90\%$ ), and at a low  
31  
32 250 prevalence ( $< 5\%$ ), had a high NPV. However, most patients fell in between both thresholds.  
33  
34  
35 251 Potential uses for such a clinical score are highlighted in supplementary table 4.  
36  
37 252  
38  
39 253  
40  
41

## 42 254 **DISCUSSION**

43  
44 255 The key findings of this study are that SARS-CoV-2 RT-PCR negative COVID-19 is common  
45  
46  
47 256 amongst patients admitted to hospital, with real-life sensitivity of RT-PCR testing from NPS  
48  
49 257 being 83% compared to a clinical reference standard of clinical diagnosis of COVID-19.  
50  
51 258 Patients with RT-PCR negative COVID-19 had similar clinical characteristics to RT-PCR  
52  
53  
54 259 positive patients in this and other cohorts,<sup>17</sup> although significantly better outcomes (lower risk of  
55  
56 260 mortality and ICU admission).<sup>13,17</sup> The proportion and number of COVID-19 admissions was  
57  
58  
59 261 increased during a three-week period from the 22<sup>nd</sup> March to 11<sup>th</sup> April 2020, and patients with  
60

1  
2  
3  
4 262 COVID-19 were substantially more unwell than patients without COVID-19, with implications for  
5  
6 263 service delivery. Mortality in patients admitted without COVID-19 was also high at 6.4%.

7  
8 264  
9  
10 265 The current gold standard diagnostic test for COVID-19, SARS-CoV-2 PCR from  
11  
12  
13 266 nasopharyngeal swabs, has several limitations which are challenging health systems and  
14  
15 267 healthcare facilities management. We demonstrate, despite high analytical sensitivity, the real-  
16  
17  
18 268 life sensitivity of PCR is inadequate (around 80% at best).<sup>18</sup> Repeat testing of patients with an  
19  
20 269 initial negative RT-PCR only increased yield by 3-5% within 48 hours. In addition to slow  
21  
22  
23 270 turnaround times, and resource and logistical challenges, there is an urgent need for alternative  
24  
25 271 rapid and accurate methods to triage and stratify patient's risk of COVID-19, to allow  
26  
27  
28 272 appropriate infection control measures and safe patient flow to cohort areas or isolation rooms,  
29  
30 273 without overwhelming hospital infrastructure. CT imaging of lungs can lack specificity for  
31  
32 274 COVID-19, and rapid RT-PCR platforms are expensive and have inadequate throughput for  
33  
34  
35 275 future peaks of COVID-19.<sup>19,20</sup> Few studies have assessed pragmatic tools to assess risk of  
36  
37 276 COVID-19 based on readily available clinical or laboratory variables.<sup>21,22</sup>

38  
39 277  
40  
41  
42 278 We found several clinical, radiological and laboratory blood factors that were associated with  
43  
44 279 COVID-19. Our diagnostic score had moderate performance for discriminating COVID-19 from  
45  
46  
47 280 other diagnoses (AUROC curve 0.83). A low risk threshold had a good specificity and PPV,  
48  
49 281 therefore could be used identify patients with a low COVID risk for transfer to a low-risk cohort  
50  
51 282 area. Similarly, the high-risk score had a good PPV and specificity, therefore these patients  
52  
53  
54 283 could be managed as having COVID-19, and cared for in isolation rooms or cohorts if  
55  
56 284 necessary. Those patients in neither high- nor low-risk group may benefit from rapid COVID-19  
57  
58  
59 285 RT-PCR or antigen testing, depending on capacity. However, this score would need external  
60

1  
2  
3  
4 286 validation before use. Although derived from a cohort including unselected acute medical  
5  
6 287 admissions, the higher prevalence of other respiratory viral pathogens may impact  
7  
8 288 performance, especially specificity.<sup>23</sup> Furthermore, this score does not account for the  
9  
10  
11 289 vulnerability of individual patients for severe COVID-19 (eg based on age or comorbidities),  
12  
13 290 which would also impact decisions on isolation and testing.<sup>22</sup>  
14  
15  
16 291  
17  
18 292 This is the first study, to our knowledge, reporting lower ICU admissions and mortality in RT-  
19  
20 293 PCR negative patients with COVID-19, despite similar markers of disease severity at admission  
21  
22  
23 294 (NEWS, CRP, oxygen saturations and requirement for supplementary oxygen), and in  
24  
25 295 multivariable adjusted model. Interestingly, the median duration of symptoms was slightly  
26  
27  
28 296 longer, and median lymphocyte count was slightly higher in PCR-negative patients, suggesting  
29  
30 297 they presented slightly later in their disease course, and therefore may be at a phase of illness  
31  
32 298 with lower viral burden in the upper respiratory tract.<sup>24-26</sup> This may also be associated with their  
33  
34  
35 299 better prognosis. Other potential reasons for better outcomes in PCR-negative patients with  
36  
37 300 COVID-19 include misclassification bias, where other respiratory conditions may have been  
38  
39  
40 301 classified as COVID-19. However, sensitivity analysis in patients with chest radiology  
41  
42 302 suggestive of COVID-19 had similar findings, and a small number of misclassifications are  
43  
44 303 unlikely to lead to such substantial differences in mortality. RT-PCR result may therefore be  
45  
46  
47 304 important in prognostic scores for COVID-19, especially as its association with mortality was  
48  
49 305 independent of other key predictors such as age and sex. Patients with RT-PCR negative  
50  
51 306 COVID-19 should also be included in treatment trials, and the efficacy of treatment could be  
52  
53  
54 307 analysed separately given their different outcomes.  
55  
56 308  
57  
58  
59  
60



1  
2  
3  
4  
5  
6  
7  
8  
9  
10  
11  
12  
13  
14  
15  
16  
17  
18  
19  
20  
21  
22  
23  
24  
25  
26  
27  
28  
29  
30  
31  
32  
33  
34  
35  
36  
37  
38  
39  
40  
41  
42  
43  
44  
45  
46  
47  
48  
49  
50  
51  
52  
53  
54  
55  
56  
57  
58  
59  
60

309 During the study period, the overall number of daily admissions did not increase substantially.

310 However, the proportion of admissions that were related to COVID-19 increased substantially in

311 late March and early April, with a fall in non-COVID-19 admissions, as previously

312 documented.<sup>27</sup> This has implications for planning for future COVID peaks. Another important

313 finding was the high mortality in patients without COVID-19, an over two-fold increase from

314 mortality in the previous year (2.4% compared to 6.4%).<sup>27</sup> Whilst we were unable to describe

315 the causes of death amongst these patients, the increased mortality may result from late

316 presentation to hospital due to national government-mandated 'lockdown' COVID-19 control

317 measures and fear of nosocomial transmission risk. This has been previously documented in

318 paediatric, cardiology, and oncology patients, but not amongst acute medical admissions.<sup>28,29</sup>

319

320 This study has several strengths. The cohort is in a large acute hospital trust with two sites

321 covering a diverse population, and all consecutive medical admissions were included. This is

322 one of the first large cohorts to report data on unselected acute medical admissions, and one of

323 the largest cohorts of RT-PCR negative patients with COVID-19. There are also several

324 limitations. The retrospective nature of the study has inherent limitations, including missing

325 data. Although we included consecutive admitted patients, not all patients had SARS-CoV-2

326 testing, and two different RT-PCR assays were used which may have slightly different primer

327 targets and analytical sensitivities, and may impact generalisability. The decision to repeat tests

328 on patients with negative RT-PCR results was made by the responsible clinical team. The

329 absence of serology or other confirmatory testing introduces a risk of misclassification bias and

330 RT-PCR inclusion in the reference standard, and the influence of variables including in the

331 diagnostic risk score on clinical diagnosis of COVID-19 introduces incorporation bias. However

332 there remains no perfect reference standard for COVID-19 diagnosis and these biases are



1  
2  
3  
4 333 unlikely to significantly impact our findings. Our diagnostic risk model needs external validation,  
5  
6 334 only has moderate discrimination, and is at risk of overfitting. Systematic reviews have  
7  
8 335 struggled to identify other diagnostic clinical scores with high discrimination, and effective  
9  
10  
11 336 patient management is likely to involve a combination of clinical features, radiology and rapid  
12  
13 337 PCR-testing.<sup>11</sup>

14  
15 338  
16  
17  
18 339 In conclusion, we demonstrate that RT-PCR negative COVID-19 is common amongst patients  
19  
20 340 admitted to hospital, and is associated with a better outcome despite similar severity at  
21  
22  
23 341 presentation. We derived and internally validated a diagnostic risk score with potential utility to  
24  
25 342 help triage patients admitted from the emergency department, although prospective trials of  
26  
27 343 different approaches are warranted in future peaks of COVID-19.

### 30 344 31 345 **Acknowledgments**

32 346  
33  
34  
35 347 The authors would like to acknowledge all staff at London North West University Healthcare  
36  
37 348 Trust who were involved in the care of patients during the study period, staff supporting the  
38  
39 349 provision of clinical care, and all patients and their families.

### 40 41 350 42 43 351 **Funding statement**

44  
45  
46 352 This research received no specific grant from any funding agency in the public, commercial or  
47  
48 353 not-for-profit sector

### 49 50 354 51 52 53 355 **Author contributions**

54  
55 356 AGW, CKM, TC, VP, GS, RT, NV, SD, AW, AM, MH and PP made substantial contribution to  
56  
57  
58 357 the conception of the work. AGW, CKM, AW, AM and PP made substantial contribution to the  
59  
60

1  
2  
3  
4  
5  
6  
7  
8  
9  
10  
11  
12  
13  
14  
15  
16  
17  
18  
19  
20  
21  
22  
23  
24  
25  
26  
27  
28  
29  
30  
31  
32  
33  
34  
35  
36  
37  
38  
39  
40  
41  
42  
43  
44  
45  
46  
47  
48  
49  
50  
51  
52  
53  
54  
55  
56  
57  
58  
59  
60

358 design of the work. AGW, CKM, JB, SF, GS, JT, NG, HC, MH contributed to data acquisition.

359 AGW and CKM analysed the data. AGW, CKM, AW, AM, PP contributed to data interpretation.

360 AGW and CKM drafted the manuscript. All authors contributed to revising the manuscript

361 critically for important intellectual content, approved the final manuscript and are accountable

362 for all aspects of the work.

363

#### **Data availability statement**

364 Data are available upon reasonable request, subject to approval by the London North West

365 University Healthcare NHS Trust Research and Governance Department and approval from

366 relevant ethics and regulatory bodies.

368

#### **Patient and Public Involvement Statement**

369 Due to the retrospective nature of this study, undertaken during the COVID-19 pandemic,

370 patients or the public were not involved in the design, or conduct, or reporting, or dissemination

371 plans of our research.

373

#### **Competing interests statement**

374 The authors have no competing interests to declare

|                                                               |                               | Not<br>diagnosed<br>with COVID | All COVID<br>diagnoses  | p-<br>value | COVID diagnosis<br>PCR negative | COVID diagnosis<br>PCR positive | p-<br>value |
|---------------------------------------------------------------|-------------------------------|--------------------------------|-------------------------|-------------|---------------------------------|---------------------------------|-------------|
|                                                               |                               | n=2215                         | n=1793                  |             | n=283                           | n=1391                          |             |
| <b>Age at admission, median<br/>years (IQR)</b>               |                               | 71 (51, 82)<br>(n=2215)        | 69 (56, 81)<br>(n=1793) | 0.44        | 70 (54, 79) (n=283)             | 70 (57, 81) (n=1391)            | 0.27        |
| <b>Age 65 years or older</b>                                  |                               | 1266 (57.2%)                   | 1005 (56.1%)            | 0.48        | 154 (54.4%)                     | 800 (57.5%)                     | 0.34        |
| <b>Sex</b>                                                    | Female                        | 1021 (46.1%)                   | 651 (36.3%)             | <0.000<br>1 | 112 (39.6%)                     | 498 (35.8%)                     | 0.23        |
|                                                               | Male                          | 1193 (53.9%)                   | 1142 (63.7%)            |             | 171 (60.4%)                     | 893 (64.2%)                     |             |
| <b>Ethnicity</b>                                              | South Asian                   | 486 (21.9%)                    | 447 (24.9%)             | <0.000<br>1 | 57 (20.1%)                      | 362 (26.0%)                     | 0.15        |
|                                                               | Asian Other                   | 174 (7.9%)                     | 211 (11.8%)             |             | 30 (10.6%)                      | 162 (11.6%)                     |             |
|                                                               | Black African or<br>Caribbean | 212 (9.6%)                     | 224 (12.5%)             |             | 33 (11.7%)                      | 181 (13.0%)                     |             |
|                                                               | Mixed Ethnicity               | 6 (0.3%)                       | 10 (0.6%)               |             | 2 (0.7%)                        | 8 (0.6%)                        |             |
|                                                               | Unknown                       | 330 (14.9%)                    | 318 (17.7%)             |             | 53 (18.7%)                      | 233 (16.8%)                     |             |
|                                                               | White European                | 890 (40.2%)                    | 458 (25.5%)             |             | 81 (28.6%)                      | 361 (26.0%)                     |             |
|                                                               | Other                         | 117 (5.3%)                     | 125 (7.0%)              |             | 27 (9.5%)                       | 84 (6.0%)                       |             |
| <b>Index of Multiple Deprivation<br/>Decile, median (IQR)</b> |                               | 5 (3, 7)<br>(n=2105)           | 5 (3, 6)<br>(n=1743)    | 0.048       | 4 (3, 6) (n=277)                | 5 (3, 6) (n=1366)               | 0.043       |
| <b>Diabetes</b>                                               |                               | 563 (25.7%)                    | 599 (33.6%)             | <0.000<br>1 | 81 (28.9%)                      | 482 (34.8%)                     | 0.059       |
| <b>Hypertension</b>                                           |                               | 825 (37.7%)                    | 739 (41.5%)             | 0.015       | 110 (39.3%)                     | 590 (42.6%)                     | 0.31        |

|    |                                                  |                      |                       |        |                   |                   |       |
|----|--------------------------------------------------|----------------------|-----------------------|--------|-------------------|-------------------|-------|
| 1  |                                                  |                      |                       |        |                   |                   |       |
| 2  |                                                  |                      |                       |        |                   |                   |       |
| 3  | <b>Ischaemic Heart Disease</b>                   | 413 (18.9%)          | 309 (17.3%)           | 0.21   | 44 (15.7%)        | 247 (17.8%)       | 0.40  |
| 4  | <b>Heart Failure</b>                             |                      |                       | <0.000 |                   |                   |       |
| 5  |                                                  | 156 (7.1%)           | 70 (3.9%)             | 1      | 14 (5.0%)         | 53 (3.8%)         | 0.36  |
| 6  |                                                  |                      |                       |        |                   |                   |       |
| 7  | <b>Chronic Obstructive</b>                       |                      |                       |        |                   |                   |       |
| 8  | <b>Pulmonary Disease</b>                         | 185 (8.5%)           | 112 (6.3%)            | 0.010  | 21 (7.5%)         | 88 (6.3%)         | 0.48  |
| 9  |                                                  |                      |                       |        |                   |                   |       |
| 10 | <b>Asthma</b>                                    | 200 (9.1%)           | 165 (9.3%)            | 0.89   | 19 (6.8%)         | 133 (9.6%)        | 0.14  |
| 11 |                                                  |                      |                       |        |                   |                   |       |
| 12 | <b>Cancer</b>                                    |                      |                       | <0.000 |                   |                   |       |
| 13 |                                                  | 169 (7.7%)           | 78 (4.4%)             | 1      | 11 (3.9%)         | 65 (4.7%)         | 0.58  |
| 14 |                                                  |                      |                       |        |                   |                   |       |
| 15 | <b>HIV</b>                                       | 21 (1.0%)            | 14 (0.8%)             | 0.56   | 3 (1.1%)          | 11 (0.8%)         | 0.64  |
| 16 |                                                  |                      |                       |        |                   |                   |       |
| 17 | <b>Cerebrovascular Disease</b>                   | 110 (5.0%)           | 96 (5.4%)             | 0.61   | 15 (5.4%)         | 75 (5.4%)         | 0.97  |
| 18 |                                                  |                      |                       |        |                   |                   |       |
| 19 | <b>Dementia</b>                                  |                      |                       | <0.000 |                   |                   |       |
| 20 |                                                  | 156 (7.1%)           | 188 (10.5%)           | 1      | 29 (10.4%)        | 153 (11.0%)       | 0.74  |
| 21 |                                                  |                      |                       |        |                   |                   |       |
| 22 | <b>Chronic Kidney Disease</b>                    | 263 (12.0%)          | 233 (13.1%)           | 0.31   | 33 (11.8%)        | 182 (13.1%)       | 0.54  |
| 23 |                                                  |                      |                       |        |                   |                   |       |
| 24 | <b>Cough</b>                                     |                      |                       | <0.000 |                   |                   |       |
| 25 |                                                  | 537 (24.5%)          | 1114 (62.5%)          | 1      | 177 (63.2%)       | 865 (62.4%)       | 0.80  |
| 26 |                                                  |                      |                       |        |                   |                   |       |
| 27 | <b>Shortness of breath</b>                       |                      |                       | <0.000 |                   |                   |       |
| 28 |                                                  | 687 (31.4%)          | 1171 (65.7%)          | 1      | 203 (72.5%)       | 886 (63.9%)       | 0.006 |
| 29 |                                                  |                      |                       |        |                   |                   |       |
| 30 | <b>Fever</b>                                     |                      |                       | <0.000 |                   |                   |       |
| 31 |                                                  | 547 (25.0%)          | 1117 (62.7%)          | 1      | 184 (65.7%)       | 860 (62.0%)       | 0.25  |
| 32 |                                                  |                      |                       |        |                   |                   |       |
| 33 | <b>Confusion</b>                                 | 241 (11.0%)          | 195 (10.9%)           | 0.95   | 30 (10.7%)        | 153 (11.0%)       | 0.87  |
| 34 |                                                  |                      |                       |        |                   |                   |       |
| 35 | <b>Symptom duration (days),<br/>median (IQR)</b> | 4 (2, 12)<br>(n=592) | 7 (3, 10)<br>(n=1083) | 0.010  | 7 (3, 12) (n=163) | 6 (3, 10) (n=844) | 0.021 |
| 36 |                                                  |                      |                       |        |                   |                   |       |
| 37 | <b>Observations</b>                              |                      |                       |        |                   |                   |       |
| 38 |                                                  |                      |                       |        |                   |                   |       |
| 39 |                                                  |                      |                       |        |                   |                   |       |
| 40 |                                                  |                      |                       |        |                   |                   |       |
| 41 |                                                  |                      |                       |        |                   |                   |       |
| 42 |                                                  |                      |                       |        |                   |                   |       |
| 43 |                                                  |                      |                       |        |                   |                   |       |
| 44 |                                                  |                      |                       |        |                   |                   |       |
| 45 |                                                  |                      |                       |        |                   |                   |       |
| 46 |                                                  |                      |                       |        |                   |                   |       |

|                                   |              |                      |                      |        |                  |                   |        |
|-----------------------------------|--------------|----------------------|----------------------|--------|------------------|-------------------|--------|
| Pulse >120 bpm                    |              | 203 (10.3%)          | 241 (14.3%)          | <0.000 | 41 (15.4%)       | 177 (13.4%)       | 0.39   |
| Respiratory rate >30 per minute   |              | 175 (8.9%)           | 568 (33.6%)          | <0.000 | 90 (33.8%)       | 439 (33.3%)       | 0.87   |
| Temperature >38°C                 |              | 180 (9.2%)           | 605 (35.9%)          | <0.000 | 72 (27.0%)       | 495 (37.7%)       | <0.001 |
| Systolic Blood Pressure <100 mmHg |              | 108 (5.5%)           | 101 (6.1%)           | 0.51   | 16 (6.1%)        | 78 (6.0%)         | 0.97   |
| Consciousness level               | Alert        | 646 (95.1%)          | 596 (96.0%)          | 0.93   | 101 (97.1%)      | 449 (95.5%)       | 0.47   |
|                                   | Confusion    | 13 (1.9%)            | 11 (1.8%)            |        | 3 (2.9%)         | 8 (1.7%)          |        |
|                                   | Verbal       | 8 (1.2%)             | 5 (0.8%)             |        | 0 (0.0%)         | 4 (0.9%)          |        |
|                                   | Pain         | 5 (0.7%)             | 3 (0.5%)             |        | 0 (0.0%)         | 3 (0.6%)          |        |
|                                   | Unresponsive | 7 (1.0%)             | 6 (1.0%)             |        | 0 (0.0%)         | 6 (1.3%)          |        |
| O <sub>2</sub> saturations <94%   |              | 198 (10.1%)          | 543 (32.2%)          | <0.000 | 79 (29.8%)       | 430 (32.6%)       | 0.37   |
| NEWS 2 Score, median (IQR)        |              | 2 (1, 4)<br>(n=1951) | 6 (3, 8)<br>(n=1666) | <0.000 | 6 (4, 7) (n=264) | 6 (3, 8) (n=1299) | 0.73   |
| NEWS 2 Score ≥5                   |              | 477 (24.4%)          | 1084 (65.1%)         | <0.000 | 176 (66.7%)      | 840 (64.7%)       | 0.53   |
| Supplementary oxygen              |              | 169 (8.8%)           | 529 (33.1%)          | <0.000 | 96 (37.9%)       | 404 (32.4%)       | 0.091  |
| PO <sub>2</sub> <8 mmHg           |              | 127 (35.4%)          | 251 (36.2%)          | 0.79   | 34 (27.9%)       | 205 (38.7%)       | 0.025  |
| PCO <sub>2</sub> >6 mmHg          |              | 124 (34.5%)          | 75 (10.8%)           | <0.000 | 12 (9.8%)        | 59 (11.1%)        | 0.68   |

|                                                  |             |                               |                               |        |                              |                               |        |
|--------------------------------------------------|-------------|-------------------------------|-------------------------------|--------|------------------------------|-------------------------------|--------|
| Neutrophils >10 x10 <sup>9</sup> /L              |             | 361 (17.8%)                   | 250 (15.6%)                   | 0.083  | 52 (19.0%)                   | 183 (14.7%)                   | 0.078  |
| Lymphocytes <1 x10 <sup>9</sup> /L               |             | 509 (25.1%)                   | 736 (46.1%)                   | <0.000 | 107 (39.1%)                  | 594 (47.8%)                   | 0.009  |
| Platelet count x10 <sup>9</sup> /L, median (IQR) |             | 246.0 (193.0, 317.0) (n=2025) | 231.0 (177.0, 306.0) (n=1597) | <0.000 | 263.0 (206.0, 343.0) (n=274) | 226.0 (172.0, 297.0) (n=1242) | <0.000 |
| Creatinine >120 mmol/L                           |             | 507 (25.2%)                   | 426 (26.9%)                   | 0.24   | 64 (23.8%)                   | 338 (27.4%)                   | 0.23   |
| CRP µg/mL, median (IQR)                          |             | 16.1 (3.4, 66.9) (n=1928)     | 98.7 (46.0, 175.3) (n=1590)   | <0.000 | 86.2 (41.7, 170.1) (n=272)   | 101.5 (48.3, 180.2) (n=1237)  | 0.15   |
| Influenza RT-PCR                                 | Influenza A | 11 (2.3%) (n=490)             | 1 (0.2%) (n=528)              | <0.000 | 0 (n=72)                     | 1 (0.2%) (n=445)              | 0.31   |
|                                                  | Influenza B | 9 (1.9%)                      | 2 (0.4%)                      |        | 1 (1.4%)                     | 1 (0.2%)                      |        |
| Admitted to ICU                                  |             | 21 (1.0%)                     | 227 (12.7%)                   | <0.000 | 22 (7.8%)                    | 192 (13.8%)                   | 0.006  |
| Died during hospital admission                   |             | 142 (6.4%) (n=2,202)          | 482 (26.9%) (n=1,789)         | <0.000 | 47 (16.6%)                   | 408 (29.3%) (n=1,387)         | <0.000 |

**Table 1.** Baseline characteristics and outcomes for patients, including demographics, co-morbidities, admission vital signs and laboratory blood tests, stratified by diagnosis and SARS- CoV-2 RT-PCR status. Data on co-morbidities represents number with each condition. Where data are missing, total numbers in each category are presented in brackets. P-values are calculated using chi-squared for proportions, t-tests for means and Wilcoxon rank sum for medians. CRP C-reactive Protein, IQR inter quartile range. NEWS National Early Warning Score. PO<sub>2</sub> partial pressure of oxygen, PCO<sub>2</sub> partial pressure of carbon dioxide.

1  
2  
3  
4  
5  
6  
7  
8  
9  
10  
11  
12  
13  
14  
15  
16  
17  
18  
19  
20  
21  
22  
23  
24  
25  
26  
27  
28  
29  
30  
31  
32  
33  
34  
35  
36  
37  
38  
39  
40  
41  
42  
43  
44  
45  
46

For peer review only

| Variable     |                   | N     | Univariable Regression |         | Multivariable regression |         |
|--------------|-------------------|-------|------------------------|---------|--------------------------|---------|
|              |                   |       | Odds Ratio (95% CI)    | p       | Odds Ratio (95% CI)      | p       |
| Age          | increase 10 years | 4,008 | 1.05 (1 - 1.08)        | 0.015   |                          |         |
|              | 50-70             | 4,008 | 1.62 (1.4 - 1.86)      | <0.0001 | 1.7 (1.4 - 2.08)         | <0.0001 |
| Sex          | Male              | 4,008 | 1.5 (1.3 - 1.71)       | <0.0001 | 1.26 (1.1 - 1.52)        | <0.0001 |
|              |                   |       |                        |         |                          |         |
| IMD Decile   |                   | 3,848 | 0.97 (0.9 - 1)         | 0.013   |                          |         |
| Diabetes     |                   | 3,971 | 1.46 (1.3 - 1.68)      | <0.0001 |                          |         |
| Hypertension |                   | 3,971 | 1.17 (1 - 1.33)        | 0.007   |                          |         |
| Ethnicity    |                   | 4,008 |                        |         |                          |         |
|              | White             | 1,348 |                        | <0.0001 |                          | <0.0001 |
|              |                   |       |                        | 1       | 1                        | 1       |



|                           |                     |       |                   |         |                   |         |
|---------------------------|---------------------|-------|-------------------|---------|-------------------|---------|
|                           | Asian               | 1,318 | 1.94 (1.7 - 2.26) |         | 1.82 (1.5 - 2.27) |         |
|                           | Black               | 436   | 2.05 (1.6 - 2.56) |         | 1.85 (1.4 - 2.53) |         |
|                           | Mixed/ Other        | 258   | 2.13 (1.6 - 2.79) |         | 2.25 (1.5 - 3.33) |         |
|                           | Unknown             | 648   | 1.87 (1.5 - 2.27) |         | 1.77 (1.3 - 2.34) |         |
| <b>Symptoms</b>           |                     | 3,971 |                   |         |                   |         |
|                           | Cough               |       | 5.13 (4.5 - 5.88) | <0.0001 |                   |         |
|                           | Shortness of breath |       | 4.19 (3.7 - 4.79) | <0.0001 |                   |         |
|                           | Fever               |       | 5.04 (4.4 - 5.78) | <0.0001 |                   |         |
| <b>Respiratory rate</b>   | Any of above        | 4,008 | 6.29 (5.4 - 7.36) | <0.0001 | 3.11 (2.5 - 3.85) | <0.0001 |
| <b>Oxygen saturations</b> |                     | 3,654 | 1.14 (1.1 - 1.15) | <0.0001 |                   |         |
| <b>NEWS Score</b>         | Continuous (linear) | 3,647 | 0.89 (0.9 - 0.9)  | <0.0001 |                   |         |
|                           | Continuous (linear) | 3,617 | 1.39 (1.3 - 1.42) | <0.0001 |                   |         |
| <b>CRP</b>                | >5                  |       | 5.76 (5 - 6.65)   | <0.0001 | 2.39 (2 - 2.87)   | <0.0001 |

|                    |                        |      |                   |        |                   |        |
|--------------------|------------------------|------|-------------------|--------|-------------------|--------|
|                    | every 10 increase      | 3,51 |                   | <0.000 |                   |        |
|                    |                        | 8    | 1.01 (1 - 1.01)   | 1      |                   |        |
| <b>Lymphocytes</b> | >50                    |      |                   | <0.000 |                   | <0.000 |
|                    |                        |      | 5.99 (5.2 - 6.93) | 1      | 3.11 (2.6 - 3.75) | 1      |
|                    | Continuous<br>(linear) | 3,62 |                   | <0.000 |                   |        |
|                    |                        | 4    | 0.66 (0.6 - 0.72) | 1      |                   |        |
| <b>Chest x-ray</b> | <1                     |      |                   | <0.000 |                   | <0.000 |
|                    |                        |      | 2.54 (2.2 - 2.93) | 1      | 1.72 (1.4 - 2.08) | 1      |
|                    |                        | 3,58 |                   |        |                   |        |
|                    |                        | 1    |                   |        |                   |        |
|                    | Normal                 | 718  |                   | <0.000 |                   | <0.000 |
|                    |                        |      | 1                 | 1      | 1                 | 1      |
|                    | lung infiltrates       | 2,26 |                   |        |                   |        |
|                    |                        | 2    | 7.79 (6.3 - 9.65) |        | 3.75 (2.9 - 4.91) |        |
|                    | other abnormality      | 601  |                   |        | 1.94 (1.4 - 2.68) |        |
|                    | CVCX0                  | 424  |                   | <0.000 |                   |        |
|                    |                        |      | 1                 | 1      |                   |        |
|                    | CVCX1                  | 1,04 | 25.85 (18.7 -     |        |                   |        |
|                    |                        | 0    | 35.66)            |        |                   |        |
|                    | CVCX2                  | 435  | 2.98 (2.3 - 3.93) |        |                   |        |
|                    | CVCX3                  | 129  | 1.64 (1.1 - 2.44) |        |                   |        |

1  
2  
3  
4  
5  
6  
7  
8  
9  
10  
11  
12  
13  
14  
15  
16  
17  
18  
19  
20  
21  
22  
23  
24  
25  
26  
27  
28  
29  
30  
31  
32  
33  
34  
35  
36  
37  
38  
39  
40  
41  
42  
43  
44  
45  
46

**Table 2.** Univariable and multivariable logistic regression analysis for risk of COVID-19 diagnosis. P-values calculated using likelihood ratio tests. There was no evidence of interaction between variables in the final multivariable model. N=2,490 for multivariable model. CVCX represents British Society of Thoracic Imaging (BSTI) classification of chest x-ray. CRP C-reactive Protein

For peer review only

| <u>Variable</u>                            |                          | <b>Coefficient</b> | <b>Standard error</b> | <b>Diagnsotic score points</b> |
|--------------------------------------------|--------------------------|--------------------|-----------------------|--------------------------------|
| <b>Age</b>                                 | <b>50-70</b>             | 0.53 (0 - 0.41)    | 0.09                  | 1                              |
| <b>Sex</b>                                 | <b>Male</b>              | 0.23 (0.3 - 0.73)  | 0.10                  | 1                              |
| <b>Ethnicity</b>                           | <b>Asian</b>             | 0.6 (0.4 - 0.82)   | 0.11                  | 1                              |
|                                            | <b>Black</b>             | 0.62 (0.3 - 0.93)  | 0.16                  | 1                              |
|                                            | <b>Mixed/Other</b>       | 0.81 (0.4 - 1.2)   | 0.20                  | 1                              |
|                                            | <b>Unknown</b>           | 0.57 (0.3 - 0.85)  | 0.14                  | 1                              |
| <b>Cough, fever or shortness of breath</b> |                          | 1.13 (0.9 - 1.35)  | 0.11                  | 2                              |
| <b>NEWS2 Score</b>                         | <b>&gt;5</b>             | 0.87 (0.7 - 1.05)  | 0.09                  | 2                              |
| <b>CRP</b>                                 | <b>&gt;50</b>            | 1.13 (1 - 1.32)    | 0.09                  | 2                              |
| <b>Lymphocytes</b>                         | <b>&lt;1</b>             | 0.54 (0.4 - 0.73)  | 0.10                  | 1                              |
| <b>Chest x-ray</b>                         | <b>lung infiltrates</b>  | 1.32 (1.1 - 1.59)  | 0.14                  | 2                              |
|                                            | <b>other abnormality</b> | 0.66 (0.3 - 0.98)  | 0.16                  | 1                              |

**Table 3.** Multivariable logistic regression diagnostic model for COVID-19, with regression ( $\beta$ ) co-efficients and diagnostic score points. The constant (intercept) was -4.0 (95% ci -4.4 to -3.6). N= 2,940.

| <b>Low-risk diagnostic score threshold (&lt;4)</b> | <b>Study population</b> | <b>Prevalence</b> |            |            |             |             |
|----------------------------------------------------|-------------------------|-------------------|------------|------------|-------------|-------------|
|                                                    |                         | <b>0.5</b>        | <b>0.2</b> | <b>0.1</b> | <b>0.05</b> | <b>0.01</b> |
| <b>Sensitivity</b>                                 | 26.6%                   | -                 | -          | -          | -           | -           |
| <b>Specificity</b>                                 | 96.6%                   | -                 | -          | -          | -           | -           |
| <b>PPV</b>                                         | 89.0%                   | 88.7%             | 66.2%      | 46.6%      | 29.2%       | 7.3%        |
| <b>NPV</b>                                         | 56.0%                   | 56.8%             | 84.0%      | 92.2%      | 96.2%       | 99.2%       |
|                                                    |                         |                   |            |            |             |             |
|                                                    |                         |                   |            |            |             |             |

|                                           |       |       |       |       |       |       |
|-------------------------------------------|-------|-------|-------|-------|-------|-------|
| High-risk diagnostic score threshold (>9) |       |       |       |       |       |       |
| Sensitivity                               | 37.0% | -     | -     | -     | -     | -     |
| Specificity                               | 96.1% | -     | -     | -     | -     | -     |
| PPV                                       | 90.1% | 90.4% | 70.1% | 51.0% | 33.0% | 8.6%  |
| NPV                                       | 61.2% | 60.4% | 85.9% | 93.2% | 96.7% | 99.3% |

**Table 4.** Diagnostic performance of a low COVID-19 risk threshold (less than 4 points on the diagnostic score) and high-risk threshold (greater than 9 points). Low-risk threshold diagnostic accuracy is for identifying patients without COVID-19, whereas high-risk threshold is for identifying patients with COVID-19

**Figure 1.** Patient flow diagram by final diagnosis and SARS-CoV-2 RT-PCR status with outcomes. Note 'presumed COVID' includes patients who were RT-PCR negative (n=293) and those who did not have a valid RT-PCR results (n=109)

**Figure 2.** (A) Receiver operating characteristic curve for the full diagnostic predictive model. Area under the curve (AUC) 0.839 (95%CI 0.824-0.853), N=2,940. (B) Calibration plot showing observed compared to predicted risk of COVID-19 diagnosis as deciles, with 95% confidence interval. The dashed green line shows perfect calibration. (C) Decision curve analysis showing standardised net benefit at different threshold probabilities for diagnosing patients with COVID-19, comparing diagnosing all patients as COVID-19 (blue solid line), diagnosing no patients with COVID-19 (solid red line), and various diagnostic risk models, including the COVID diagnostic score (full model and simplified risk score), C-reactive protein over 50, and National Early Warning Score of 5 or more. CRP C-reactive Protein, NEWS National Early Warning Score

**Figure 3.** (A) Overlaid histogram of COVID diagnostic risk score and number of patients with COVID-19 (white) and alternative (not COVID-19) diagnoses. (B) Proportion (%) of patients with COVID-19 (orange) or alternative (not COVID-19, blue) diagnoses by COVID diagnostic risk score. N=2,940

## References

- 1 Long C, Xu H, Shen Q, *et al.* Diagnosis of the Coronavirus disease (COVID-19): rRT-PCR or CT? *Eur J Radiol* 2020; **126**. DOI:10.1016/j.ejrad.2020.108961.
- 2 Arevalo-Rodriguez I, Buitrago-Garcia D, Simancas-Racines D, *et al.* False-Negative Results of Initial Rt-Pcr Assays for Covid-19: a Systematic Review. 2020; : 1–26.
- 3 Woloshin S, Patel N, Kesselheim AS. False Negative Tests for SARS-CoV-2 Infection - Challenges and Implications. *N Engl J Med* 2020; **383**: e38.
- 4 Xie X, Zhong Z, Zhao W, Zheng C, Wang F, Liu J. Chest CT for Typical 2019-nCoV Pneumonia: Relationship to Negative RT-PCR Testing. *Radiology* 2020; : 200343.
- 5 Brogna B, Bignardi E, Brogna C, *et al.* Typical CT findings of COVID-19 pneumonia in patients presenting with repetitive negative RT-PCR. *Radiography* 2020. DOI:10.1016/j.radi.2020.09.012.
- 6 Watson J, Whiting PF, Brush JE. Interpreting a covid-19 test result. *BMJ* 2020; **369**: 1–7.
- 7 Jang S, Rhee J-Y, Wi YM, Jung BK. Viral Kinetics of SARS-CoV-2 over the preclinical, clinical, and postclinical period. *Int J Infect Dis* 2020; published online Nov. DOI:10.1016/j.ijid.2020.10.099.
- 8 Guan W, Ni Z, Hu Y, *et al.* Clinical characteristics of coronavirus disease 2019 in China. *N Engl J Med* 2020; **382**: 1708–20.
- 9 Docherty AB, Harrison EM, Green CA, *et al.* Features of 20 133 UK patients in hospital with covid-19 using the ISARIC WHO Clinical Characterisation Protocol: Prospective observational cohort study. *BMJ* 2020; **369**. DOI:10.1136/bmj.m1985.
- 10 Richardson S, Hirsch JS, Narasimhan M, *et al.* Presenting Characteristics, Comorbidities, and Outcomes Among 5700 Patients Hospitalized With COVID-19 in the New York City Area. *Jama* 2020; **10022**: 1–8.
- 11 Wynants L, Van Calster B, Collins GS, *et al.* Prediction models for diagnosis and prognosis of covid-19: Systematic review and critical appraisal. *BMJ* 2020; **369**. DOI:10.1136/bmj.m1328.
- 12 British Society of Thoracic Imaging. COVID-19 CXR Report Proforma. .
- 13 Knight SR, Ho A, Pius R, *et al.* Risk stratification of patients admitted to hospital with covid-19 using the ISARIC WHO Clinical Characterisation Protocol: Development and validation of the 4C Mortality Score. *BMJ* 2020; **370**: 1–13.
- 14 Baik Y, Rickman HM, Hanrahan CF, *et al.* A clinical score for identifying active tuberculosis while awaiting microbiological results: Development and validation of a multivariable prediction model in sub-Saharan Africa. *PLOS Med* 2020; **17**: e1003420.
- 15 Altman DG, Vergouwe Y, Royston P, Moons KGM. Prognosis and prognostic research:

- 1  
2  
3  
4 Validating a prognostic model. *BMJ* 2009; **338**: 1432–5.
- 5  
6 16 Collins GS, Reitsma JB, Altman DG, Moons KGM. Transparent reporting of a  
7 multivariable prediction model for individual prognosis or diagnosis (TRIPOD): The  
8 TRIPOD Statement. *BMC Med* 2015; **13**: 1.
- 9  
10  
11 17 De Angelis G, Posteraro B, Biscetti F, *et al*. Confirmed or unconfirmed cases of 2019  
12 novel coronavirus pneumonia in Italian patients: a retrospective analysis of clinical  
13 features. *BMC Infect Dis* 2020; **20**. DOI:10.1186/s12879-020-05504-7.
- 14  
15 18 Tang Y-W, Schmitz JE, Persing DH, Stratton CW. Laboratory Diagnosis of COVID-19:  
16 Current Issues and Challenges. 2020  
17 [www.chinamerlin.com/en/index.php?pproducts\\_show&id166&s\\_id&c\\_id68&](http://www.chinamerlin.com/en/index.php?pproducts_show&id166&s_id&c_id68&) (accessed  
18 Oct 15, 2020).
- 19  
20 19 Gibani MM, Toumazou C, Sohbaty M, *et al*. Assessing a novel, lab-free, point-of-care  
21 test for SARS-CoV-2 (CovidNudge): a diagnostic accuracy study. *The Lancet Microbe*  
22 2020; **0**. DOI:10.1016/s2666-5247(20)30121-x.
- 23  
24 20 Salameh JP, Leeflang MMG, Hooft L, *et al*. Thoracic imaging tests for the diagnosis of  
25 COVID-19. *Cochrane Database Syst Rev* 2020; **2020**.  
26 DOI:10.1002/14651858.CD013639.pub2.
- 27  
28 21 Wake RM, Morgan M, Choi J, Winn S. Reducing nosocomial transmission of COVID-19:  
29 implementation of a COVID-19 triage system. *Clin Med* 2020; **20**: e141–5.
- 30  
31 22 Patterson B, Marks M, Martinez-Garcia G, *et al*. A novel cohorting and isolation strategy  
32 for suspected COVID-19 cases during a pandemic. *J Hosp Infect* 2020; **105**: 632–7.
- 33  
34 23 Pormohammad A, Ghorbani S, Khatami A, *et al*. Comparison of influenza type A and B  
35 with COVID-19: A global systematic review and meta-analysis on clinical, laboratory and  
36 radiographic findings. *Rev Med Virol* 2020; published online Oct 9.  
37 DOI:10.1002/rmv.2179.
- 38  
39 24 Zheng S, Fan J, Yu F, *et al*. Viral load dynamics and disease severity in patients  
40 infected with SARS-CoV-2 in Zhejiang province, China, January-March 2020:  
41 Retrospective cohort study. *BMJ* 2020; **369**. DOI:10.1136/bmj.m1443.
- 42  
43 25 To KKW, Tsang OTY, Leung WS, *et al*. Temporal profiles of viral load in posterior  
44 oropharyngeal saliva samples and serum antibody responses during infection by SARS-  
45 CoV-2: an observational cohort study. *Lancet Infect Dis* 2020; **20**: 565–74.
- 46  
47 26 Xiao AT, Tong YX, Gao C, Zhu L, Zhang YJ, Zhang S. Dynamic profile of RT-PCR  
48 findings from 301 COVID-19 patients in Wuhan, China: A descriptive study. *J Clin Virol*  
49 2020; **127**: 104346.
- 50  
51 27 NHS Digital. Summary Hospital-level Mortality Indicator (SHMI) - Deaths associated with  
52 hospitalisation, England, March 2019 - February 2020. 2020. <https://digital.nhs.uk/data->
- 53  
54  
55  
56  
57  
58  
59  
60

- 1  
2  
3  
4 and-information/publications/statistical/shmi/2020-07/shmi-march-2019---february-2020  
5 (accessed Oct 14, 2020).  
6  
7 28 Lynn RM, Avis JL, Lenton S, Amin-Chowdhury Z, Ladhani SN. Delayed access to care  
8 and late presentations in children during the COVID-19 pandemic: A snapshot survey of  
9 4075 paediatricians in the UK and Ireland. *Arch. Dis. Child.* 2020; **0**.  
10 DOI:10.1136/archdischild-2020-319848.  
11  
12  
13 29 Pessoa-Amorim G, Camm CF, Gajendragadkar P, *et al.* Admission of patients with  
14 STEMI since the outbreak of the COVID-19 pandemic: a survey by the European  
15 Society of Cardiology. *Eur Hear journal Qual care Clin outcomes* 2020; **6**: 210–6.  
16  
17  
18  
19  
20  
21  
22  
23  
24  
25  
26  
27  
28  
29  
30  
31  
32  
33  
34  
35  
36  
37  
38  
39  
40  
41  
42  
43  
44  
45  
46  
47  
48  
49  
50  
51  
52  
53  
54  
55  
56  
57  
58  
59  
60



1  
2  
3  
4  
5  
6  
7  
8  
9  
10  
11  
12  
13  
14  
15  
16  
17  
18  
19  
20  
21  
22  
23  
24  
25  
26  
27  
28  
29  
30  
31  
32  
33  
34  
35  
36  
37  
38  
39  
40  
41  
42  
43  
44  
45  
46  
47  
48  
49  
50  
51  
52  
53  
54  
55  
56  
57  
58  
59  
60

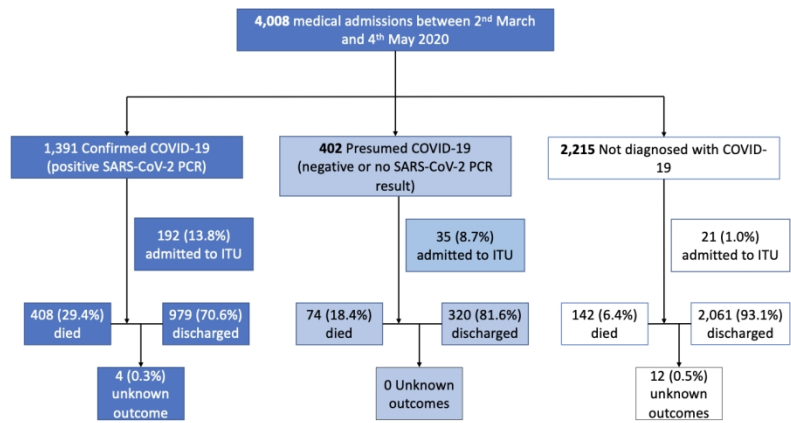

Figure 1

297x209mm (150 x 150 DPI)

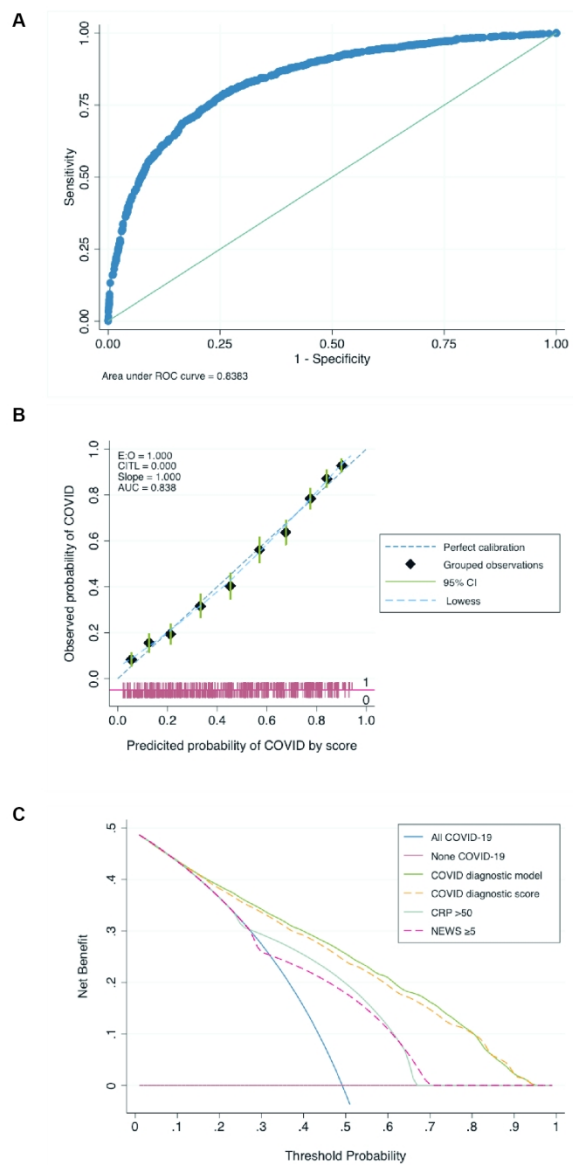

Figure 2

1  
2  
3  
4  
5  
6  
7  
8  
9  
10  
11  
12  
13  
14  
15  
16  
17  
18  
19  
20  
21  
22  
23  
24  
25  
26  
27  
28  
29  
30  
31  
32  
33  
34  
35  
36  
37  
38  
39  
40  
41  
42  
43  
44  
45  
46  
47  
48  
49  
50  
51  
52  
53  
54  
55  
56  
57  
58  
59  
60

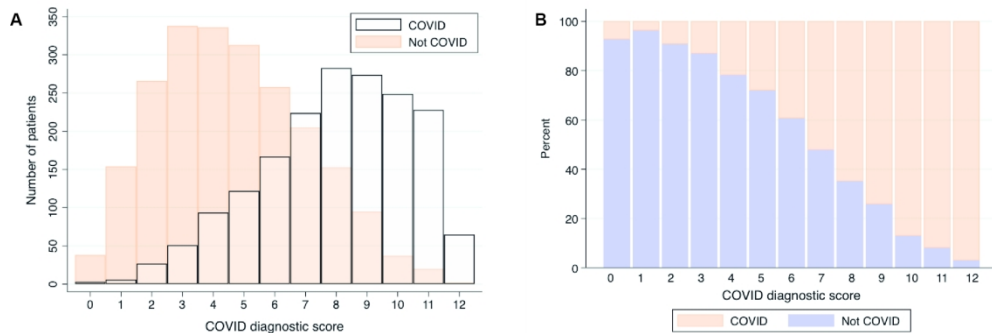

Figure 3

1  
2  
3 **Supplementary Appendix-** False-negative RT-PCR for COVID-19 and a diagnostic risk score: a  
4 retrospective cohort study among patients admitted to hospital  
5  
6  
7  
8  
9  
10  
11  
12  
13  
14  
15  
16  
17  
18  
19  
20  
21  
22  
23  
24  
25  
26  
27  
28  
29  
30  
31  
32  
33  
34  
35  
36  
37  
38  
39  
40  
41  
42  
43  
44  
45  
46  
47  
48  
49  
50  
51  
52  
53  
54  
55  
56  
57  
58  
59  
60

For peer review only

|                                            |     | Not diagnosed with COVID   | All COVID diagnoses        | p-value | COVID negative PCR       | COVID diagnosis PCR positive | p-value |
|--------------------------------------------|-----|----------------------------|----------------------------|---------|--------------------------|------------------------------|---------|
|                                            |     | n=2215                     | n=1793                     |         | n=283                    | n=1391                       |         |
| <b>Symptoms</b>                            |     |                            |                            |         |                          |                              |         |
| Cough                                      |     | 537 (24.5%)                | 1114 (62.5%)               | <0.001  | 177 (63.2%)              | 865 (62.4%)                  | 0.80    |
| Chest pain                                 |     | 335 (15.3%)                | 109 (6.1%)                 | <0.001  | 23 (8.2%)                | 80 (5.8%)                    | 0.12    |
| Diarrhoea                                  |     | 152 (6.9%)                 | 131 (7.4%)                 | 0.62    | 25 (8.9%)                | 96 (6.9%)                    | 0.24    |
| Fall                                       |     | 277 (12.7%)                | 166 (9.3%)                 | <0.001  | 24 (8.6%)                | 129 (9.3%)                   | 0.70    |
| Symptom duration (days), median (IQR)      |     | 4 (2, 12) (n=592)          | 7 (3, 10) (n=1083)         | 0.010   | 7 (3, 12) (n=163)        | 6 (3, 10) (n=844)            | 0.021   |
| <b>Observations</b>                        |     |                            |                            |         |                          |                              |         |
| Pulse, median (IQR)                        |     | 89 (75, 106) (n=1964)      | 96 (83, 110) (n=1689)      | <0.001  | 98 (85, 110) (n=266)     | 96 (83, 110) (n=1319)        | 0.050   |
| Pulse >120 bpm                             |     | 203 (10.3%)                | 241 (14.3%)                | <0.001  | 41 (15.4%)               | 177 (13.4%)                  | 0.39    |
| Respiratory rate per minute, median (IQR)  |     | 20 (18, 23) (n=1966)       | 26 (21, 32) (n=1688)       | <0.001  | 26 (22, 32) (n=266)      | 26 (20, 32) (n=1318)         | 0.59    |
| Respiratory rate >30 per minute            |     | 175 (8.9%)                 | 568 (33.6%)                | <0.001  | 90 (33.8%)               | 439 (33.3%)                  | 0.87    |
| Temperature °C, median (IQR)               |     | 36.7 (36.4, 37.1) (n=1961) | 37.5 (36.8, 38.4) (n=1684) | <0.001  | 37.3 (36.7, 38) (n=267)  | 37.5 (36.8, 38.4) (n=1313)   | 0.007   |
| Temperature >38°C                          |     | 180 (9.2%)                 | 605 (35.9%)                | <0.001  | 72 (27.0%)               | 495 (37.7%)                  | <0.001  |
| Systolic Blood Pressure mmHg, median (IQR) |     | 136 (119, 154) (n=1948)    | 132 (117, 147) (n=1666)    | <0.001  | 131 (118, 146.5) (n=264) | 132 (117, 148) (n=1299)      | 0.88    |
| Systolic Blood Pressure mmHg <100          |     | 108 (5.5%)                 | 101 (6.1%)                 | 0.51    | 16 (6.1%)                | 78 (6.0%)                    | 0.97    |
| O <sub>2</sub> saturations %, median (IQR) |     | 97 (96, 99) (n=1961)       | 96 (92, 97) (n=1686)       | <0.001  | 95 (93, 98) (n=265)      | 96 (92, 97) (n=1317)         | 0.55    |
| O <sub>2</sub> saturations <94%            |     | 198 (10.1%)                | 543 (32.2%)                | <0.001  | 79 (29.8%)               | 430 (32.6%)                  | 0.37    |
| NEWS 2 Score, median (IQR)                 |     | 2 (1, 4) (n=1951)          | 6 (3, 8) (n=1666)          | <0.001  | 6 (4, 7) (n=264)         | 6 (3, 8) (n=1299)            | 0.73    |
| NEWS 2 Score ≥5                            |     | 477 (24.4%)                | 1084 (65.1%)               | <0.001  | 176 (66.7%)              | 840 (64.7%)                  | 0.53    |
| Supplementary oxygen                       | Yes | 169 (8.8%)                 | 529 (33.1%)                | <0.001  | 96 (37.9%)               | 404 (32.4%)                  | 0.091   |

|                                                      |  |                                  |                                |        |                                 |                                  |        |
|------------------------------------------------------|--|----------------------------------|--------------------------------|--------|---------------------------------|----------------------------------|--------|
|                                                      |  |                                  |                                |        |                                 |                                  |        |
| <b>Blood gas and pathology</b>                       |  |                                  |                                |        |                                 |                                  |        |
| PO <sub>2</sub> (KPa), median (IQR)                  |  | 8.8 (7.3, 11.1)<br>(n=359)       | 8.7 (7.4, 10.7)<br>(n=693)     | 0.51   | 9.1 (7.7, 10.6)<br>(n=122)      | 8.5 (7.3, 10.7)<br>(n=530)       | 0.18   |
| PO <sub>2</sub> <8 v                                 |  | 127 (35.4%)                      | 251 (36.2%)                    | 0.79   | 34 (27.9%)                      | 205 (38.7%)                      | 0.025  |
| pCO <sub>2</sub> (KPa), median (IQR)                 |  | 5.2 (4.4, 6.7) (n=359)           | 4.6 (4.1, 5.2)<br>(n=693)      | <0.001 | 4.6 (4.1, 5.2)<br>(n=122)       | 4.6 (4.1, 5.2) (n=530)           | 0.83   |
| pCO <sub>2</sub> >6                                  |  | 124 (34.5%)                      | 75 (10.8%)                     | <0.001 | 12 (9.8%)                       | 59 (11.1%)                       | 0.68   |
| Haemoglobin (g/L), mean (SD)                         |  | 121.7 (23.2) (n=2026)            | 124.4 (21.1)<br>(n=1598)       | <0.001 | 122.2 (21.0)<br>(n=274)         | 124.6 (20.9) (n=1243)            | 0.085  |
| Neutrophil count (x10 <sup>9</sup> /L), median (IQR) |  | 5.9 (4.1, 8.6)<br>(n=2026)       | 5.8 (4.0, 8.3)<br>(n=1598)     | 0.20   | 6.7 (4.5, 9.1)<br>(n=274)       | 5.6 (3.9, 8.0)<br>(n=1243)       | <0.001 |
| Neutrophils >10 x10 <sup>9</sup> /L                  |  | 361 (17.8%)                      | 250 (15.6%)                    | 0.083  | 52 (19.0%)                      | 183 (14.7%)                      | 0.078  |
| Lymphocyte count (x10 <sup>9</sup> /L), median (IQR) |  | 1.4 (0.9, 2.0)<br>(n=2026)       | 1.0 (0.7, 1.4)<br>(n=1598)     | <0.001 | 1.1 (0.8, 1.4)<br>(n=274)       | 1.0 (0.7, 1.4)<br>(n=1243)       | 0.013  |
| Lymphocytes <1 x10 <sup>9</sup> /L                   |  | 509 (25.1%)                      | 736 (46.1%)                    | <0.001 | 107 (39.1%)                     | 594 (47.8%)                      | 0.009  |
| Platelet count (x10 <sup>9</sup> /L), median (IQR)   |  | 246.0 (193.0, 317.0)<br>(n=2025) | 231.0 (177.0, 306.0) (n=1597)  | <0.001 | 263.0 (206.0, 343.0)<br>(n=274) | 226.0 (172.0, 297.0)<br>(n=1242) | <0.001 |
| Platelets <100 x10 <sup>9</sup> /L                   |  | 80 (4.0%)                        | 62 (3.9%)                      | 0.92   | 11 (4.0%)                       | 50 (4.0%)                        | 0.99   |
| ALT, median (IQR)                                    |  | 22.0 (15.0, 36.0)<br>(n=1755)    | 31.0 (18.0, 51.0)<br>(n=1412)  | <0.001 | 31.0 (18.0, 55.0)<br>(n=245)    | 30.0 (19.0, 51.0)<br>(n=1096)    | 0.71   |
| Creatinine (mmol/L), median (IQR)                    |  | 84.0 (65.0, 121.0)<br>(n=2011)   | 86.0 (67.0, 124.0)<br>(n=1582) | 0.057  | 80.0 (65.0, 117.0)<br>(n=269)   | 87.0 (68.0, 127.0)<br>(n=1235)   | 0.011  |
| Creatinine >120 mmol/L                               |  | 507 (25.2%)                      | 426 (26.9%)                    | 0.24   | 64 (23.8%)                      | 338 (27.4%)                      | 0.23   |
| Urea (mmol/L), median (IQR)                          |  | 6.0 (4.0, 9.8)<br>(n=2025)       | 6.1 (4.0, 10.6)<br>(n=1584)    | 0.58   | 5.5 (3.8, 8.9)<br>(n=270)       | 6.4 (4.1, 11.0)<br>(n=1236)      | 0.007  |
| CRP µg/mL, median (IQR)                              |  | 16.1 (3.4, 66.9)<br>(n=1928)     | 98.7 (46.0, 175.3)<br>(n=1590) | <0.001 | 86.2 (41.7, 170.1)<br>(n=272)   | 101.5 (48.3, 180.2)<br>(n=1237)  | 0.15   |
| CRP >50 µg/mL                                        |  | 599 (31.1%)                      | 1160 (73.0%)                   | <0.001 | 191 (70.2%)                     | 917 (74.1%)                      | 0.19   |
| Glucose (mmol/L), median (IQR)                       |  | 6.6 (5.6, 8.5)<br>(n=1182)       | 7.1 (5.9, 9.3)<br>(n=910)      | <0.001 | 6.7 (5.9, 9.1)<br>(n=147)       | 7.1 (5.9, 9.3) (n=710)           | 0.49   |
| Lactate >2 mmol/L                                    |  | 41 (3.5%)                        | 30 (3.3%)                      | 0.83   | 5 (3.4%)                        | 21 (3.0%)                        | 0.78   |

1  
2  
3  
4  
5  
6  
7  
8  
9  
10  
11  
12  
13  
14  
15  
16  
17  
18  
19  
20  
21  
22  
23  
24  
25  
26  
27  
28  
29  
30  
31  
32  
33  
34  
35  
36  
37  
38  
39  
40  
41  
42  
43  
44  
45  
46

**Supplementary Table 1.** Baseline characteristics for patients, including co-morbidities, admission vital signs and laboratory blood tests, stratified by diagnosis and SARS- CoV-2 RT-PCR status. Data on com-morbidities represents number with each condition. Where data are missing, numbers in each category are presented. P-values are calculated using chi-squared for proportions, t-tests for means and Wilcoxon rank sum for medians. CRP C-reactive Protein, IQR inter quartile range. NEWS National Early Warning Score. PO2 partial pressure of oxygen, PCO2 partial pressure of carbon dioxide.

For peer review only

| Variable                 |           | Odds ratio (95% CI) | P-value |
|--------------------------|-----------|---------------------|---------|
| COVID-19 RT-PCR negative |           | 0.41 (0.3 - 0.6)    | <0.0001 |
| Age, years               |           | 1.06 (1.0 - 1.1)    | <0.0001 |
| Sex                      | Female    | 0.90 (0.7 - 1.2)    | 0.446   |
| Co-morbidities           | 1         | 1.13 (0.8 - 1.7)    | 0.552   |
|                          | 2 or more | 1.45 (1.0 - 2.1)    | 0.042   |
| CRP                      |           | 1.00 (1.0 - 1.0)    | <0.0001 |
| Oxygen Saturations <94%  |           | 1.41 (1.1 - 1.9)    | 0.016   |
| Urea                     |           | 1.04 (1 - 1.1)      | <0.0001 |

**Supplementary Table 2.** Multivariable logistic regression model assessing association between COVID-19 PCR-status and mortality, adjusting for other variables known to be risk-factors for mortality in COVID-19. Continuous variables modelled as linear. No interactions in the final model. P-values calculated by likelihood ratio tests. N= 1,414.

| Variable                            |                   | $\beta$ -Coefficient | Odds ratio (95% CI) | Diagnostic score points |
|-------------------------------------|-------------------|----------------------|---------------------|-------------------------|
| Age                                 | 50-70             | 0.4 (0.2 - 0.6)      | 1.5 (1.2-1.8)       | 1                       |
| Sex                                 | Male              | 0.2 (0.0 - 0.3)      | 1.2 (1.0-1.4)       | 1                       |
| Ethnicity                           | Asian             | 0.6 (0.4 - 0.8)      | 1.8 (1.4-2.1)       | 1                       |
|                                     | Black             | 0.6 (0.4 - 0.9)      | 1.9 (1.4-2.5)       | 1                       |
|                                     | Mixed/Other       | 0.8 (0.4 - 1.1)      | 2.2 (1.5-3.1)       | 1                       |
|                                     | Unknown           | 0.5 (0.3 - 0.8)      | 1.7 (1.3-2.2)       | 1                       |
| Cough, fever or shortness of breath |                   | 1.3 (1.2 - 1.5)      | 3.8 (3.2-4.5)       | 2                       |
| NEWS2 Score                         | >5                | 0.9 (0.7 - 1.1)      | 2.4 (2.0-2.9)       | 2                       |
| CRP                                 | >50               | 1.1 (1.0 - 1.3)      | 3.0 (2.6-3.7)       | 2                       |
| Lymphocytes                         | <1                | 0.6 (0.4 - 0.8)      | 1.8 (1.5 - 2.2)     | 1                       |
| Chest x-ray                         | lung infiltrates  | 1.3 (1.0 - 1.5)      | 3.6 (2.8 - 4.5)     | 2                       |
|                                     | other abnormality | 0.7 (0.4 - 0.9)      | 1.9 (1.4-2.6)       | 1                       |

**Supplementary Table 3.** Logistic regression multivariable model for COVID-19 diagnosis using multivariate multiple imputation using chained equations for missing data in candidate predictor variables, with odds ratio and  $\beta$  co-efficients. N=3,968. Area under the receiver operator curve (ROC) = 0.86 (95% CI 0.84 - 0.87).



| COVID status based on diagnostic risk score (proportion of patients expected during 'peak') | Management                                                                                                                                                                                                                                                                                                              |
|---------------------------------------------------------------------------------------------|-------------------------------------------------------------------------------------------------------------------------------------------------------------------------------------------------------------------------------------------------------------------------------------------------------------------------|
| Low risk, COVID-19 diagnostic risk score <4                                                 | <ul style="list-style-type: none"> <li>• Alternative diagnosis most likely</li> <li>• Rapid RT-PCR or antigen test, if negative send to 'COVID-negative' area</li> </ul>                                                                                                                                                |
| Medium risk, COVID-19 diagnostic score 4-9                                                  | <ul style="list-style-type: none"> <li>• Uncertain if COVID-19 is cause for presentation</li> <li>• Will need further testing to determine COVID-19 diagnosis</li> <li>• Either test with Rapid RT-PCR or antigen test, or consider CT imaging, or standard COVID-19 RT-PCR testing and move to isolation in</li> </ul> |
| High risk, COVID-19 diagnostic score >9                                                     | <ul style="list-style-type: none"> <li>• COVID-19 most likely</li> <li>• Isolate patient in COVID-19 area or isolation room and standard COVID-19 RT-PCR testing</li> </ul>                                                                                                                                             |

Supplementary Table 4. Potential application of COVID-19 diagnostic risk score

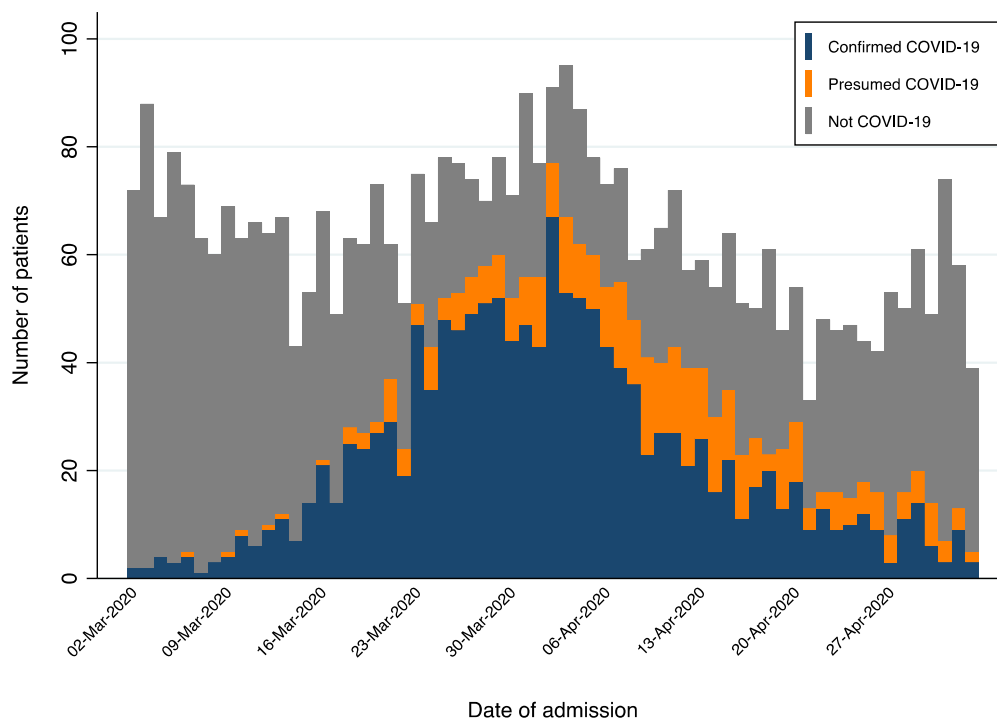

Supplementary Figure 1. Number of patients admitted and final diagnosis by date of admission. Confirmed COVID-19 is patients with a positive SARS-CoV-2 PCR from nasopharyngeal swab, presumed COVID-19 is patients without a positive SARS-CoV-2 PCR but a discharge diagnosis of COVID-19. Not COVID-19 are patients without a positive SARS-CoV-2 PCR and an alternative diagnosis. N=4008.

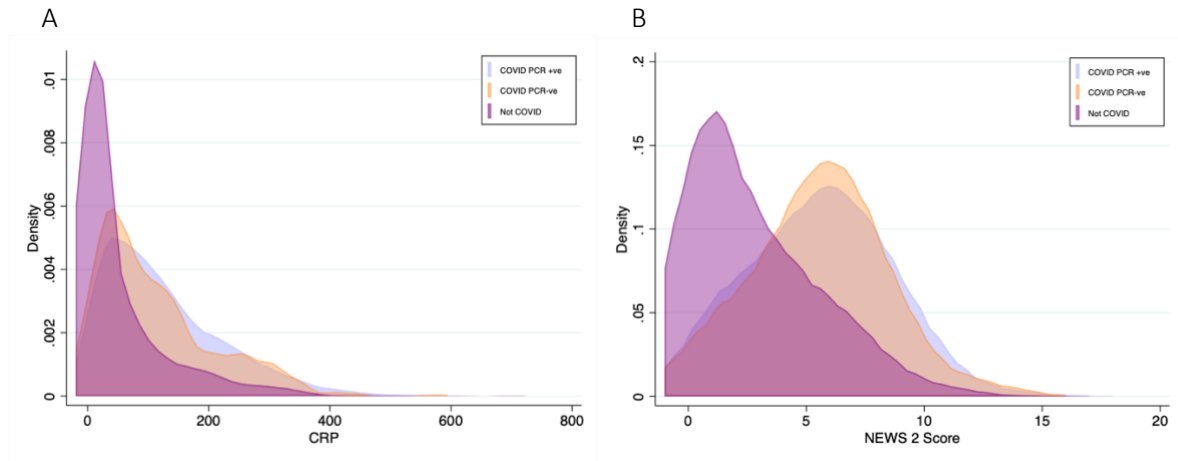

**Supplementary Figure 2.** Distribution of (A) C-reactive protein (N=3518) and (B) National Early Warning Score (NEWS) (N=3889) by diagnosis at the time of hospital admission.

**False-negative RT-PCR for COVID-19 and diagnostic risk score: a retrospective cohort study among patients admitted to hospital**  
**STROBE 2007 (v4) Statement—Checklist of items that should be included in reports of *cohort studies***

| Section/Topic                | Item # | Recommendation                                                                                                                                                                       | Reported on page # |
|------------------------------|--------|--------------------------------------------------------------------------------------------------------------------------------------------------------------------------------------|--------------------|
| <b>Title and abstract</b>    | 1      | (a) Indicate the study's design with a commonly used term in the title or the abstract                                                                                               | 1                  |
|                              |        | (b) Provide in the abstract an informative and balanced summary of what was done and what was found                                                                                  | 2                  |
| <b>Introduction</b>          |        |                                                                                                                                                                                      |                    |
| Background/rationale         | 2      | Explain the scientific background and rationale for the investigation being reported                                                                                                 | 3                  |
| Objectives                   | 3      | State specific objectives, including any prespecified hypotheses                                                                                                                     | 3                  |
| <b>Methods</b>               |        |                                                                                                                                                                                      |                    |
| Study design                 | 4      | Present key elements of study design early in the paper                                                                                                                              | 4                  |
| Setting                      | 5      | Describe the setting, locations, and relevant dates, including periods of recruitment, exposure, follow-up, and data collection                                                      | 4                  |
| Participants                 | 6      | (a) Give the eligibility criteria, and the sources and methods of selection of participants. Describe methods of follow-up                                                           | 4-5                |
|                              |        | (b) For matched studies, give matching criteria and number of exposed and unexposed                                                                                                  | NA                 |
| Variables                    | 7      | Clearly define all outcomes, exposures, predictors, potential confounders, and effect modifiers. Give diagnostic criteria, if applicable                                             | 5                  |
| Data sources/<br>measurement | 8*     | For each variable of interest, give sources of data and details of methods of assessment (measurement). Describe comparability of assessment methods if there is more than one group | 4-5                |
| Bias                         | 9      | Describe any efforts to address potential sources of bias                                                                                                                            | 5-6                |
| Study size                   | 10     | Explain how the study size was arrived at                                                                                                                                            | 5                  |
| Quantitative variables       | 11     | Explain how quantitative variables were handled in the analyses. If applicable, describe which groupings were chosen and why                                                         | 5-6                |
| Statistical methods          | 12     | (a) Describe all statistical methods, including those used to control for confounding                                                                                                | 5-6                |
|                              |        | (b) Describe any methods used to examine subgroups and interactions                                                                                                                  | 6                  |
|                              |        | (c) Explain how missing data were addressed                                                                                                                                          | 6                  |
|                              |        | (d) If applicable, explain how loss to follow-up was addressed                                                                                                                       | NA                 |
|                              |        | (e) Describe any sensitivity analyses                                                                                                                                                | 5-6                |

|                          |     |                                                                                                                                                                                                              |                 |
|--------------------------|-----|--------------------------------------------------------------------------------------------------------------------------------------------------------------------------------------------------------------|-----------------|
| <b>Results</b>           |     |                                                                                                                                                                                                              |                 |
| Participants             | 13* | (a) Report numbers of individuals at each stage of study—eg numbers potentially eligible, examined for eligibility, confirmed eligible, included in the study, completing follow-up, and analysed            | Figure 1/page 7 |
|                          |     | (b) Give reasons for non-participation at each stage                                                                                                                                                         | NA              |
|                          |     | (c) Consider use of a flow diagram                                                                                                                                                                           | Figure 1        |
| Descriptive data         | 14* | (a) Give characteristics of study participants (eg demographic, clinical, social) and information on exposures and potential confounders                                                                     | Table 1, page 7 |
|                          |     | (b) Indicate number of participants with missing data for each variable of interest                                                                                                                          | Table 1         |
|                          |     | (c) Summarise follow-up time (eg, average and total amount)                                                                                                                                                  | 7               |
| Outcome data             | 15* | Report numbers of outcome events or summary measures over time                                                                                                                                               | 7, figure S2    |
| Main results             | 16  | (a) Give unadjusted estimates and, if applicable, confounder-adjusted estimates and their precision (eg, 95% confidence interval). Make clear which confounders were adjusted for and why they were included | 7-8             |
|                          |     | (b) Report category boundaries when continuous variables were categorized                                                                                                                                    | 7-8             |
|                          |     | (c) If relevant, consider translating estimates of relative risk into absolute risk for a meaningful time period                                                                                             | NA              |
| Other analyses           | 17  | Report other analyses done—eg analyses of subgroups and interactions, and sensitivity analyses                                                                                                               | 7-8             |
| <b>Discussion</b>        |     |                                                                                                                                                                                                              |                 |
| Key results              | 18  | Summarise key results with reference to study objectives                                                                                                                                                     | 10              |
| <b>Limitations</b>       |     |                                                                                                                                                                                                              |                 |
| Interpretation           | 20  | Give a cautious overall interpretation of results considering objectives, limitations, multiplicity of analyses, results from similar studies, and other relevant evidence                                   | 10-11           |
| Generalisability         | 21  | Discuss the generalisability (external validity) of the study results                                                                                                                                        | 11              |
| <b>Other information</b> |     |                                                                                                                                                                                                              |                 |
| Funding                  | 22  | Give the source of funding and the role of the funders for the present study and, if applicable, for the original study on which the present article is based                                                | 12              |

\*Give information separately for cases and controls in case-control studies and, if applicable, for exposed and unexposed groups in cohort and cross-sectional studies.

**Note:** An Explanation and Elaboration article discusses each checklist item and gives methodological background and published examples of transparent reporting. The STROBE checklist is best used in conjunction with this article (freely available on the Web sites of PLoS Medicine at <http://www.plosmedicine.org/>, Annals of Internal Medicine at <http://www.annals.org/>, and Epidemiology at <http://www.epidem.com/>). Information on the STROBE Initiative is available at [www.strobe-statement.org](http://www.strobe-statement.org).

False-negative RT-PCR for COVID-19 and diagnostic risk score: a retrospective cohort study among patients admitted to hospital

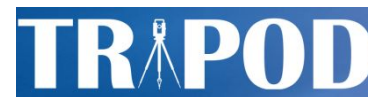

TRIPOD Checklist: Prediction Model Development and Validation

| Section/Topic                | Item | Checklist Item | Page                                                                                                                                                                                                                                        |                  |
|------------------------------|------|----------------|---------------------------------------------------------------------------------------------------------------------------------------------------------------------------------------------------------------------------------------------|------------------|
| <b>Title and abstract</b>    |      |                |                                                                                                                                                                                                                                             |                  |
| Title                        | 1    | D;V            | Identify the study as developing and/or validating a multivariable prediction model, the target population, and the outcome to be predicted.                                                                                                | 1                |
| Abstract                     | 2    | D;V            | Provide a summary of objectives, study design, setting, participants, sample size, predictors, outcome, statistical analysis, results, and conclusions.                                                                                     | 2                |
| <b>Introduction</b>          |      |                |                                                                                                                                                                                                                                             |                  |
| Background and objectives    | 3a   | D;V            | Explain the medical context (including whether diagnostic or prognostic) and rationale for developing or validating the multivariable prediction model, including references to existing models.                                            | 3                |
|                              | 3b   | D;V            | Specify the objectives, including whether the study describes the development or validation of the model or both.                                                                                                                           | 3                |
| <b>Methods</b>               |      |                |                                                                                                                                                                                                                                             |                  |
| Source of data               | 4a   | D;V            | Describe the study design or source of data (e.g., randomized trial, cohort, or registry data), separately for the development and validation data sets, if applicable.                                                                     | 4                |
|                              | 4b   | D;V            | Specify the key study dates, including start of accrual; end of accrual; and, if applicable, end of follow-up.                                                                                                                              | 4                |
| Participants                 | 5a   | D;V            | Specify key elements of the study setting (e.g., primary care, secondary care, general population) including number and location of centres.                                                                                                | 4                |
|                              | 5b   | D;V            | Describe eligibility criteria for participants.                                                                                                                                                                                             | 4                |
|                              | 5c   | D;V            | Give details of treatments received, if relevant.                                                                                                                                                                                           | NA               |
| Outcome                      | 6a   | D;V            | Clearly define the outcome that is predicted by the prediction model, including how and when assessed.                                                                                                                                      | 6                |
|                              | 6b   | D;V            | Report any actions to blind assessment of the outcome to be predicted.                                                                                                                                                                      | NA               |
| Predictors                   | 7a   | D;V            | Clearly define all predictors used in developing or validating the multivariable prediction model, including how and when they were measured.                                                                                               | 6                |
|                              | 7b   | D;V            | Report any actions to blind assessment of predictors for the outcome and other predictors.                                                                                                                                                  | NA               |
| Sample size                  | 8    | D;V            | Explain how the study size was arrived at.                                                                                                                                                                                                  | 6                |
| Missing data                 | 9    | D;V            | Describe how missing data were handled (e.g., complete-case analysis, single imputation, multiple imputation) with details of any imputation method.                                                                                        | 6-7              |
| Statistical analysis methods | 10a  | D              | Describe how predictors were handled in the analyses.                                                                                                                                                                                       | 6                |
|                              | 10b  | D              | Specify type of model, all model-building procedures (including any predictor selection), and method for internal validation.                                                                                                               | 6                |
|                              | 10c  | V              | For validation, describe how the predictions were calculated.                                                                                                                                                                               | 6-7              |
|                              | 10d  | D;V            | Specify all measures used to assess model performance and, if relevant, to compare multiple models.                                                                                                                                         | 6                |
|                              | 10e  | V              | Describe any model updating (e.g., recalibration) arising from the validation, if done.                                                                                                                                                     | NA               |
| Risk groups                  | 11   | D;V            | Provide details on how risk groups were created, if done.                                                                                                                                                                                   | 6-7              |
| Development vs. validation   | 12   | V              | For validation, identify any differences from the development data in setting, eligibility criteria, outcome, and predictors.                                                                                                               | NA               |
| <b>Results</b>               |      |                |                                                                                                                                                                                                                                             |                  |
| Participants                 | 13a  | D;V            | Describe the flow of participants through the study, including the number of participants with and without the outcome and, if applicable, a summary of the follow-up time. A diagram may be helpful.                                       | Figure 1, page 7 |
|                              | 13b  | D;V            | Describe the characteristics of the participants (basic demographics, clinical features, available predictors), including the number of participants with missing data for predictors and outcome.                                          | Table 1          |
|                              | 13c  | V              | For validation, show a comparison with the development data of the distribution of important variables (demographics, predictors and outcome).                                                                                              | NA               |
| Model development            | 14a  | D              | Specify the number of participants and outcome events in each analysis.                                                                                                                                                                     | 7                |
|                              | 14b  | D              | If done, report the unadjusted association between each candidate predictor and outcome.                                                                                                                                                    | Table 2          |
| Model specification          | 15a  | D              | Present the full prediction model to allow predictions for individuals (i.e., all regression coefficients, and model intercept or baseline survival at a given time point).                                                                 | Table 3          |
|                              | 15b  | D              | Explain how to use the prediction model.                                                                                                                                                                                                    | 9                |
| Model performance            | 16   | D;V            | Report performance measures (with CIs) for the prediction model.                                                                                                                                                                            | 9, supplement    |
| Model-updating               | 17   | V              | If done, report the results from any model updating (i.e., model specification, model performance).                                                                                                                                         | NA               |
| <b>Discussion</b>            |      |                |                                                                                                                                                                                                                                             |                  |
| Limitations                  | 18   | D;V            | Discuss any limitations of the study (such as nonrepresentative sample, few events per predictor, missing data).                                                                                                                            | 10-11            |
| Interpretation               | 19a  | V              | For validation, discuss the results with reference to performance in the development data, and any other validation data.                                                                                                                   | 10-11            |
|                              | 19b  | D;V            | Give an overall interpretation of the results, considering objectives, limitations, results from similar studies, and other relevant evidence.                                                                                              | 10-11            |
| Implications                 | 20   | D;V            | Discuss the potential clinical use of the model and implications for future research.                                                                                                                                                       | 10-11, table S5  |
| <b>Other information</b>     |      |                |                                                                                                                                                                                                                                             |                  |
| Supplementary information    | 21   | D;V            | Provide information about the availability of supplementary resources, such as study protocol, Web calculator, and data sets. <a href="https://www.bmj.com/site/about/guidelines.xhtml">https://www.bmj.com/site/about/guidelines.xhtml</a> | Supplement       |

False-negative RT-PCR for COVID-19 and diagnostic risk score: a retrospective cohort study among patients admitted to hospital



TRIPOD Checklist: Prediction Model Development and Validation

|         |    |     |                                                                               |                     |
|---------|----|-----|-------------------------------------------------------------------------------|---------------------|
|         |    |     |                                                                               | ary<br>appen<br>dix |
| Funding | 22 | D;V | Give the source of funding and the role of the funders for the present study. | 12                  |

\*Items relevant only to the development of a prediction model are denoted by D, items relating solely to a validation of a prediction model are denoted by V, and items relating to both are denoted D;V. We recommend using the TRIPOD Checklist in conjunction with the TRIPOD Explanation and Elaboration document.

For peer review only
