# Supplementary material for: False-negative RT-PCR for COVID-19 and a diagnostic risk score: a retrospective cohort study among patients admitted to hospital
Source: PubMed Central journal article supplement — BMJ Open. 2021 Feb 9;11(2):e047110. doi: 10.1136/bmjopen-2020-047110 (PMC7874904; doi:10.1136/bmjopen-2020-047110), 2021-02-09
Supplement: bmjopen-2020-047110supp001.pdf [file bmjopen-2020-047110supp001.pdf]

|                                            |     | Not diagnosed with COVID   | All COVID diagnoses        | p-value | COVID negative PCR        |
|--------------------------------------------|-----|----------------------------|----------------------------|---------|---------------------------|
|                                            |     | n=2215                     | n=1793                     |         | n=283                     |
| <b>Symptoms</b>                            |     |                            |                            |         |                           |
| Cough                                      |     | 537 (24.5%)                | 1114 (62.5%)               | <0.001  | 177 (63.2%)               |
| Chest pain                                 |     | 335 (15.3%)                | 109 (6.1%)                 | <0.001  | 23 (8.2%)                 |
| Diarrhoea                                  |     | 152 (6.9%)                 | 131 (7.4%)                 | 0.62    | 25 (8.9%)                 |
| Fatigue                                    |     | 277 (12.7%)                | 166 (9.3%)                 | <0.001  | 24 (8.6%)                 |
| Symptom duration (days), median (IQR)      |     | 4 (2, 12) (n=592)          | 7 (3, 10) (n=1064)         | 0.010   | 7 (3, 12) (n=283)         |
| <b>Observations</b>                        |     |                            |                            |         |                           |
| Pulse, median (IQR)                        |     | 89 (75, 106) (n=1961)      | 96 (83, 110) (n=1689)      | <0.001  | 98 (85, 111) (n=267)      |
| Pulse >120 bpm                             |     | 203 (10.3%)                | 241 (14.3%)                | <0.001  | 41 (15.4%)                |
| Respiratory rate per minute, median (IQR)  |     | 20 (18, 23) (n=1961)       | 26 (21, 32) (n=1688)       | <0.001  | 26 (22, 32) (n=267)       |
| Respiratory rate >30 per minute            |     | 175 (8.9%)                 | 568 (33.6%)                | <0.001  | 90 (33.8%)                |
| Temperature °C, median (IQR)               |     | 36.7 (36.4, 37.1) (n=1961) | 37.5 (36.8, 38.4) (n=1684) | <0.001  | 37.3 (36.7, 37.9) (n=267) |
| Temperature >38°C                          |     | 180 (9.2%)                 | 605 (35.9%)                | <0.001  | 72 (27.0%)                |
| Systolic Blood Pressure mmHg, median (IQR) |     | 136 (119, 154) (n=1948)    | 132 (117, 147) (n=1666)    | <0.001  | 131 (118, 144) (n=264)    |
| Systolic Blood Pressure mmHg <100          |     | 108 (5.5%)                 | 101 (6.1%)                 | 0.51    | 16 (6.1%)                 |
| O <sub>2</sub> saturations %, median (IQR) |     | 97 (96, 99) (n=1961)       | 96 (92, 97) (n=1686)       | <0.001  | 95 (93, 98) (n=267)       |
| O <sub>2</sub> saturations <94%            |     | 198 (10.1%)                | 543 (32.2%)                | <0.001  | 79 (29.8%)                |
| NEWS 2 Score, median (IQR)                 |     | 2 (1, 4) (n=1951)          | 6 (3, 8) (n=1666)          | <0.001  | 6 (4, 7) (n=267)          |
| NEWS 2 Score ≥5                            |     | 477 (24.4%)                | 1084 (65.1%)               | <0.001  | 176 (66.7%)               |
| Supplementary oxygen                       | Yes | 169 (8.8%)                 | 529 (33.1%)                | <0.001  | 96 (37.9%)                |

|                                                      |  |                                  |                                  |        |                                 |
|------------------------------------------------------|--|----------------------------------|----------------------------------|--------|---------------------------------|
| Blood gas and pathology                              |  |                                  |                                  |        |                                 |
| PO <sub>2</sub> (KPa), median (IQR)                  |  | 8.8 (7.3, 11.1)<br>(n=359)       | 8.7 (7.4, 10.7)<br>(n=693)       | 0.51   | 9.1 (7.7, 11.1)<br>(n=122)      |
| PO <sub>2</sub> <8 v                                 |  | 127 (35.4%)                      | 251 (36.2%)                      | 0.79   | 34 (27.9%)                      |
| pCO <sub>2</sub> (KPa), median (IQR)                 |  | 5.2 (4.4, 6.7) (n=359)           | 4.6 (4.1, 5.2)<br>(n=693)        | <0.001 | 4.6 (4.1, 5.2)<br>(n=122)       |
| pCO <sub>2</sub> >6                                  |  | 124 (34.5%)                      | 75 (10.8%)                       | <0.001 | 12 (9.8%)                       |
| Haemoglobin (g/L), mean (SD)                         |  | 121.7 (23.2) (n=2025)            | 124.4 (21.1)<br>(n=1598)         | <0.001 | 122.2 (21.1)<br>(n=274)         |
| Neutrophil count (x10 <sup>9</sup> /L), median (IQR) |  | 5.9 (4.1, 8.6)<br>(n=2026)       | 5.8 (4.0, 8.3)<br>(n=1598)       | 0.20   | 6.7 (4.5, 9.0)<br>(n=274)       |
| Neutrophils >10 x10 <sup>9</sup> /L                  |  | 361 (17.8%)                      | 250 (15.6%)                      | 0.083  | 52 (19.0%)                      |
| Lymphocyte count (x10 <sup>9</sup> /L), median (IQR) |  | 1.4 (0.9, 2.0)<br>(n=2026)       | 1.0 (0.7, 1.4)<br>(n=1598)       | <0.001 | 1.1 (0.8, 1.4)<br>(n=274)       |
| Lymphocytes <1 x10 <sup>9</sup> /L                   |  | 509 (25.1%)                      | 736 (46.1%)                      | <0.001 | 107 (39.1%)                     |
| Platelet count (x10 <sup>9</sup> /L), median (IQR)   |  | 246.0 (193.0, 317.0)<br>(n=2025) | 231.0 (177.0, 306.0)<br>(n=1597) | <0.001 | 263.0 (206.0, 320.0)<br>(n=274) |
| Platelets <100 x10 <sup>9</sup> /L                   |  | 80 (4.0%)                        | 62 (3.9%)                        | 0.92   | 11 (4.0%)                       |
| ALT, median (IQR)                                    |  | 22.0 (15.0, 36.0)<br>(n=1755)    | 31.0 (18.0, 51.0)<br>(n=1412)    | <0.001 | 31.0 (18.0, 51.0)<br>(n=245)    |
| Creatinine (mmol/L), median (IQR)                    |  | 84.0 (65.0, 121.0)<br>(n=2011)   | 86.0 (67.0, 124.0)<br>(n=1582)   | 0.057  | 80.0 (65.0, 121.0)<br>(n=269)   |
| Creatinine >120 mmol/L                               |  | 507 (25.2%)                      | 426 (26.9%)                      | 0.24   | 64 (23.8%)                      |
| Urea (mmol/L), median (IQR)                          |  | 6.0 (4.0, 9.8)<br>(n=2025)       | 6.1 (4.0, 10.6)<br>(n=1584)      | 0.58   | 5.5 (3.8, 8.0)<br>(n=270)       |
| CRP µg/mL, median (IQR)                              |  | 16.1 (3.4, 66.9)<br>(n=1928)     | 98.7 (46.0, 175.3)<br>(n=1590)   | <0.001 | 86.2 (41.7, 175.3)<br>(n=272)   |
| CRP >50 µg/mL                                        |  | 599 (31.1%)                      | 1160 (73.0%)                     | <0.001 | 191 (70.2%)                     |
| Glucose (mmol/L), median (IQR)                       |  | 6.6 (5.6, 8.5)<br>(n=1182)       | 7.1 (5.9, 9.3)<br>(n=910)        | <0.001 | 6.7 (5.9, 9.3)<br>(n=147)       |
| Lactate >2 mmol/L                                    |  | 41 (3.5%)                        | 30 (3.3%)                        | 0.83   | 5 (3.4%)                        |

Supplementary Table 1. Baseline characteristics for patients, including co-morbidities, admission and SARS-CoV-2 RT-PCR status. Data on com-morbidities represents number with each condition presented. P-values are calculated using chi-squared for proportions, t-tests for means and Wilcoxon for quartile range. NEWS National Early Warning Score. PO2 partial pressure of oxygen, PCO2 partial pressure of carbon dioxide
