# Supplementary material for: False-negative RT-PCR for COVID-19 and a diagnostic risk score: a retrospective cohort study among patients admitted to hospital
Source: PubMed Central journal article supplement — BMJ Open. 2021 Feb 9;11(2):e047110. doi: 10.1136/bmjopen-2020-047110 (PMC7874904; doi:10.1136/bmjopen-2020-047110), 2021-02-09
Supplement: bmjopen-2020-047110supp002.pdf [file bmjopen-2020-047110supp002.pdf]

| Variable                 |           | Odds ratio (95% CI) | P-value |
|--------------------------|-----------|---------------------|---------|
| COVID-19 RT-PCR negative |           | 0.41 (0.3 - 0.6)    | <0.0001 |
| Age, years               |           | 1.06 (1.0 - 1.1)    | <0.0001 |
| Sex                      | Female    | 0.90 (0.7 - 1.2)    | 0.446   |
| Co-morbidities           | 1         | 1.13 (0.8 - 1.7)    | 0.552   |
|                          | 2 or more | 1.45 (1.0 - 2.1)    | 0.042   |
| CRP                      |           | 1.00 (1.0 - 1.0)    | <0.0001 |
| Oxygen Saturation <94%   |           | 1.41 (1.1 - 1.9)    | 0.016   |
| Urea                     |           | 1.04 (1 - 1.1)      | <0.0001 |

Supplementary Table 2. Multivariable logistic regression model assessing association between PCR-status and mortality, adjusting for other variables known to be risk-factors for mortality in 19. Continuous variables modelled as linear. No interactions in the final model. P-values calculated using likelihood ratio tests. N= 1,414.
