# Supplementary material for: False-negative RT-PCR for COVID-19 and a diagnostic risk score: a retrospective cohort study among patients admitted to hospital
Source: PubMed Central journal article supplement — BMJ Open. 2021 Feb 9;11(2):e047110. doi: 10.1136/bmjopen-2020-047110 (PMC7874904; doi:10.1136/bmjopen-2020-047110), 2021-02-09
Supplement: bmjopen-2020-047110supp003.pdf [file bmjopen-2020-047110supp003.pdf]

| Variable                            |                   | $\beta$ -Coefficient | Odds ratio (95% CI) | Diagnostic score points |
|-------------------------------------|-------------------|----------------------|---------------------|-------------------------|
| Age                                 | 50-70             | 0.4 (0.2 - 0.6)      | 1.5 (1.2-1.8)       | 1                       |
| Sex                                 | Male              | 0.2 (0.0 - 0.3)      | 1.2 (1.0-1.4)       | 1                       |
| Ethnicity                           | Asian             | 0.6 (0.4 - 0.8)      | 1.8 (1.4-2.1)       | 1                       |
|                                     | Black             | 0.6 (0.4 - 0.9)      | 1.9 (1.4-2.5)       | 1                       |
|                                     | Mixed/Other       | 0.8 (0.4 - 1.1)      | 2.2 (1.5-3.1)       | 1                       |
|                                     | Unknown           | 0.5 (0.3 - 0.8)      | 1.7 (1.3-2.2)       | 1                       |
| Cough, fever or shortness of breath |                   | 1.3 (1.2 - 1.5)      | 3.8 (3.2-4.5)       | 2                       |
| NEWS2 Score                         | >5                | 0.9 (0.7 - 1.1)      | 2.4 (2.0-2.9)       | 2                       |
| CRP                                 | >50               | 1.1 (1.0 - 1.3)      | 3.0 (2.6-3.7)       | 2                       |
| Lymphocytes                         | <1                | 0.6 (0.4 - 0.8)      | 1.8 (1.5 - 2.2)     | 1                       |
| Chest x-ray                         | lung infiltrates  | 1.3 (1.0 - 1.5)      | 3.6 (2.8 -4.5)      | 2                       |
|                                     | other abnormality | 0.7 (0.4 - 0.9)      | 1.9 (1.4-2.6)       | 1                       |

Supplementary Table 3. Logistic regression multivariable model for COVID-19 diagnosis using multivariate multiple imputation using chained equations for missing data in candidate predict variables, with odds ratio and  $\beta$  co-efficients. N=3,968. Area under the receiver operator curve 0.86 (95% CI 0.84 - 0.87).
