# Supplementary material for: False-negative RT-PCR for COVID-19 and a diagnostic risk score: a retrospective cohort study among patients admitted to hospital
Source: PubMed Central journal article supplement — BMJ Open. 2021 Feb 9;11(2):e047110. doi: 10.1136/bmjopen-2020-047110 (PMC7874904; doi:10.1136/bmjopen-2020-047110), 2021-02-09
Supplement: bmjopen-2020-047110supp004.pdf [file bmjopen-2020-047110supp004.pdf]

| COVID status based on diagnostic risk score (proportion of patients expected during 'peak') | Management                                                                                                                                                                                                                                                                                                        |
|---------------------------------------------------------------------------------------------|-------------------------------------------------------------------------------------------------------------------------------------------------------------------------------------------------------------------------------------------------------------------------------------------------------------------|
| Low risk, COVID-19 diagnostic risk <4                                                       | <ul style="list-style-type: none"> <li>Alternative diagnosis most likely</li> <li>Rapid RT-PCR or antigen test, if negative send to 'COVID-negative' area</li> </ul>                                                                                                                                              |
| Medium risk, COVID-19 diagnostic risk 4-9                                                   | <ul style="list-style-type: none"> <li>Uncertain if COVID-19 is cause for presentation</li> <li>Will need further testing to determine COVID-19 diagnosis</li> <li>Either test with Rapid RT-PCR or antigen test, or consider CT imaging, or standard COVID-19 RT-PCR testing and move to isolation in</li> </ul> |
| High risk, COVID-19 diagnostic risk >9                                                      | <ul style="list-style-type: none"> <li>COVID-19 most likely</li> <li>Isolate patient in COVID-19 area or isolation room and standard COVID-19 RT-PCR testing</li> </ul>                                                                                                                                           |

Supplementary Table 4. Potential application of COVID-19 diagnostic risk score

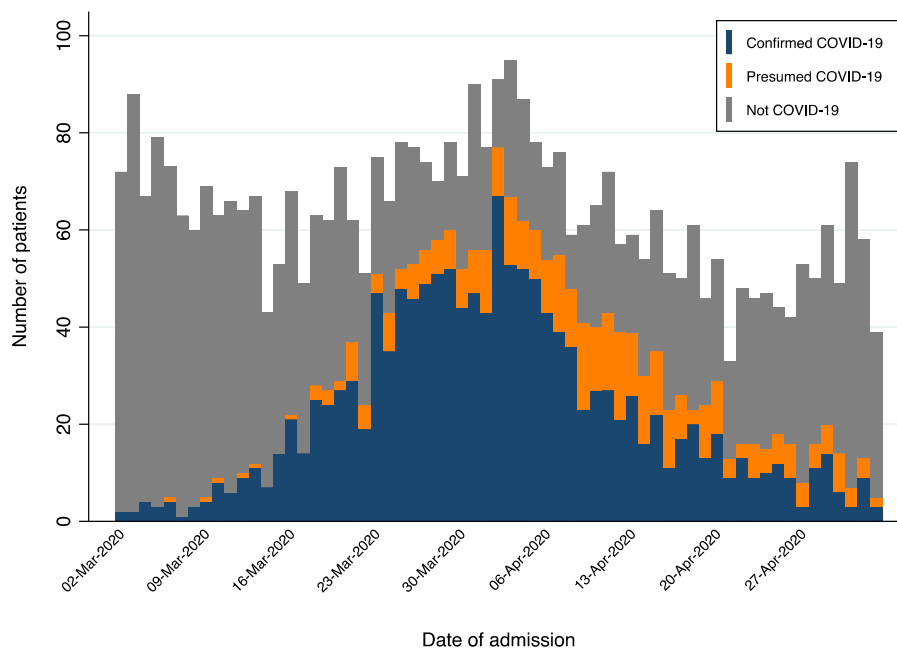

Supplementary Figure 1. Number of patients admitted and final diagnosis by date of admission. Confirmed COVID-19 is patients with a positive SARS-CoV-2 PCR from nasopharyngeal swab, presumed COVID-19 is patients without a positive SARS-CoV-2 PCR but a discharge diagnosis of COVID-19, and Not COVID-19 are patients without a positive SARS-CoV-2 PCR and an alternative diagnosis. N=400
