# Supplementary material for: False-negative RT-PCR for COVID-19 and a diagnostic risk score: a retrospective cohort study among patients admitted to hospital
Source: PubMed Central journal article supplement — BMJ Open. 2021 Feb 9;11(2):e047110. doi: 10.1136/bmjopen-2020-047110 (PMC7874904; doi:10.1136/bmjopen-2020-047110), 2021-02-09
Supplement: bmjopen-2020-047110supp006.pdf [file bmjopen-2020-047110supp006.pdf]

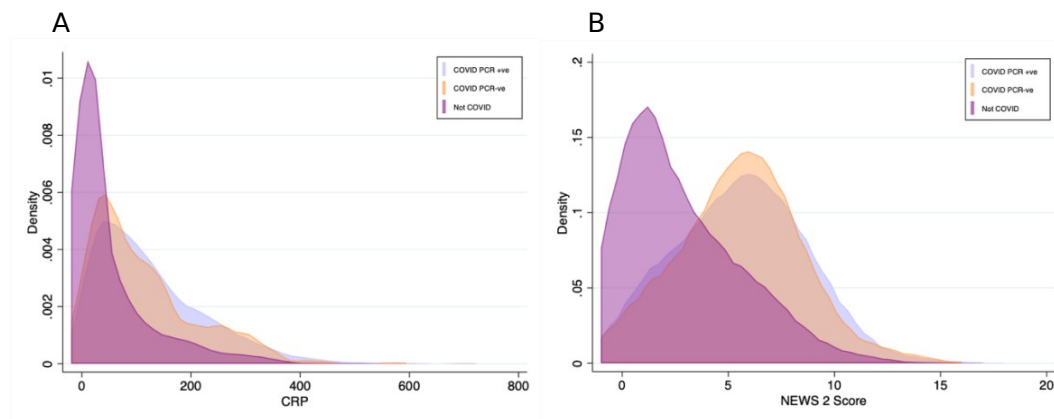

Supplementary Figure 2. Distribution of (A) C-reactive protein (N=3518) and (B) National Early Score (NEWS) (N=3889) by diagnosis at the time of hospital admission.
